# Supplementary material
Source: publisher figshare collection journal article supplement (https://acs.figshare.com/ndownloader/files/7543531)

***Supporting Information***  
**Enantioselective Total Synthesis Of  
(+)-Sieboldine A**

**Mohammed K. Abd El-Gaber, Shigeo Yasuda, Eisuke Iida and  
Chisato Mukai**

*Division of Pharmaceutical Sciences, Graduate School of Medical  
Sciences, Kanazawa University; Kakuma-machi, Kanazawa 920–1192,  
Japan*

***Table of Contents***

|                                                                                     |         |
|-------------------------------------------------------------------------------------|---------|
| General notes.....                                                                  | S2      |
| Synthetic procedures.....                                                           | S3-S22  |
| Optimization of asymmetric allylation of aldehyde <b>9</b> ( <b>Table S1</b> )..... | S23     |
| Determination of the absolute configuration of ( <b>R</b> )- <b>10</b> .....        | S24-S25 |
| Comparison of synthetic and natural (+)-sieboldine A spectral data...               | S26-S27 |
| <sup>1</sup> H, <sup>13</sup> C NMR spectra & HPLC chromatograms .....              | S28-S76 |

**General notes:**

All commercially obtained reagents and solvents were used as received unless additional purification is stated in the procedure. All glassware was oven-dried at 150 °C and cooled in desiccator immediately before use. Experiments were conducted under inert atmospheres of Nitrogen or Argon using standard syringe-septa techniques. Reactions performed at room temperature were at approximately 24 °C. Thin layer chromatography (TLC) was performed on Merck analytical glass plates pre-coated with silica gel 60 F254 (0.25 mm thick). Visualization was effected by exposure to UV light (254 nm) and staining with *p*-anisaldehyde or phosphomolybdic acid stains followed by a brief heating on a hot plate. Concentration under reduced pressure was performed by rotary evaporation (~30 mmHg) at 20-40 °C. Flash column chromatography was performed as described by W. C. Still *et al.* (*J. Org. Chem.* **1978**, 43, 2923.) using forced flow of the indicated solvent system on Kanto<sup>®</sup> Chemical silica gel 60N (spherical, neutral, 40–50 µm). Melting points were determined on YANAGIMOTO micro melting point apparatus and were uncorrected. Infrared spectra were recorded on a ThermoFisher Nicolet iS5 spectrometer and are reported in terms of frequency of absorption (cm<sup>-1</sup>). NMR spectra were recorded on JNM-ECS400 or JNM-ECA600 spectrometers. Chemical shift (δ) values are reported in parts per million relative to internal standard tetramethylsilane (δ 0.00 ppm) and residual CDCl<sub>3</sub> (δ 7.27 ppm) for proton spectra and to residual CDCl<sub>3</sub> (δ 77.23 ppm) for carbon spectra. Coupling constants are reported in Hertz. The following abbreviations were used for spin multiplicity: s, singlet; br s, broad singlet; d, doublet; t, triplet; q, quartet; dd, doublet of doublet; ddd, doublet of doublet of doublet; td, triplet of doublet; m, multiplet; br m, broad multiplet. High-resolution mass spectra were measured with JMS-T100TD (DART) mass spectrometer. Optical rotations were measured with a JASCO P-2200 polarimeter with a sodium lamp and reported as followed: [α]<sub>D</sub><sup>T</sup> (concentration g/100 mL, solvent). Single-crystal X-ray diffraction was measured with R-Axis RAPID II.

### 1-Methoxy-4-((pent-4-ynyloxy)methyl)benzene **S2**

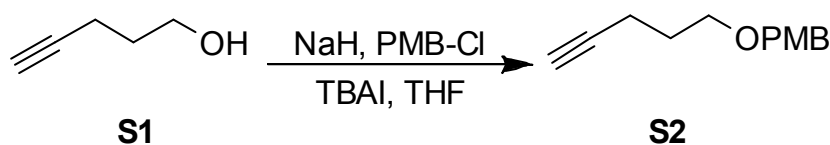

1-Methoxy-4-((pent-4-ynyloxy)methyl)benzene **S2** was prepared from 4-pentyn-1-ol **S1** according to the method described by Chandrasekhar *et al.*<sup>1</sup>

### 2-((Tributylstannyl)methyl)allyl acetate **S4**

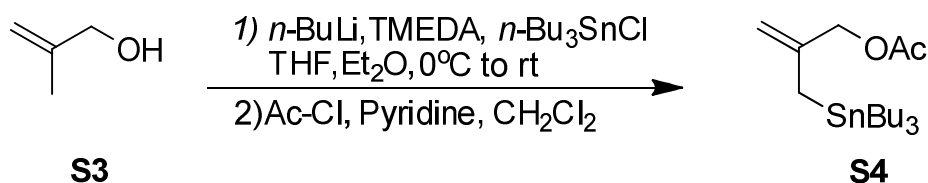

2-((Tributylstannyl)methyl)allyl acetate **S4** was prepared from methallyl alcohol **S3** according to the procedure described by Trost and Bonk.<sup>2</sup>

### 6-((4-Methoxybenzyl)oxy)hex-2-ynal **9**

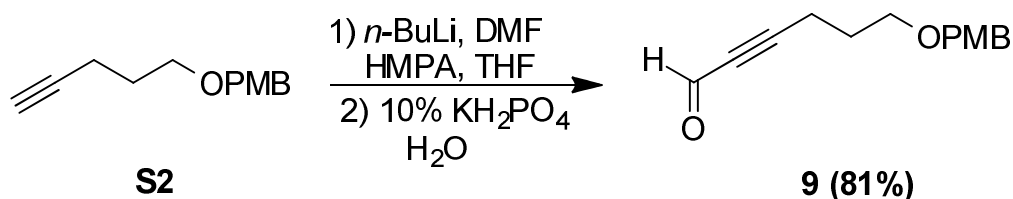

To a solution of alkyne **S3** (10 g, 49 mmol) and hexamethylphosphoramide HMPA (21.5 mL, 122.5 mmol) in THF (100 mL) at -45 °C was added *n*-BuLi (1.43 M in hexane, 51.5 mL, 73.5 mmol). After stirring for 30 min at the same temperature, DMF (15 mL, 196 mmol) was added at once and the reaction mixture was warmed up to room temperature over 1 h. The reaction was quenched with 10% aq  $\text{KH}_2\text{PO}_4$  (270 mL) and the mixture was partitioned between EtOAc and brine. The layers were separated and the aqueous layer was extracted three times with EtOAc. The combined organic extracts were dried over anhydrous  $\text{Na}_2\text{SO}_4$ , filtered and concentrated under reduced pressure. The residue was purified by flash column chromatography using

(1) Chandrasekhar, S; Rao, C. L.; Seenaiiah, M.; Naresh, P.; Jagadeesh, B.; Manjeera, D.; Sarkar, A.; Bhadra, M. P. *J. Org. Chem.* **2009**, *74*, 401.

(2) Trost, B. M.; Bonk, P. J. *J. Am. Chem. Soc.* **1985**, *107*, 1778.

(hexanes/EtOAc, 6:1) as an eluent to afford aldehyde **9** as pale yellow oil (9.2 g, 81% yield):  $^1\text{H}$  NMR (600 MHz,  $\text{CDCl}_3$ );  $\delta$  9.11 (s, 1H), 7.24 (dd,  $J = 8.2, 4.1$ , 2H), 6.86 (dd,  $J = 8.6, 4.3$ , 2H), 4.42 (s, 2H), 3.76 (s, 3H), 3.51 (t,  $J = 6.0$ , 2H), 2.51 (td,  $J = 7.0, 3.5$ , 2H), 1.85-1.84 (m, 2H);  $^{13}\text{C}$  NMR (151 MHz,  $\text{CDCl}_3$ );  $\delta$  176.9, 159.0, 130.0, 129.0, 113.5, 98.3, 81.5, 72.4, 67.5, 54.9, 27.5, 15.8; IR (thin film,  $\text{cm}^{-1}$ ) 2200, 1664, 1243, 1030; DART HRMS  $m/z$   $[\text{M}+\text{H}]^+$  calcd for  $\text{C}_{14}\text{H}_{17}\text{O}_3$  233.1177, found 233.1190.

**(*R*)-4-Hydroxy-9-((4-methoxybenzyl)oxy)-2-methylenenon-5-yn-1-yl acetate **10****

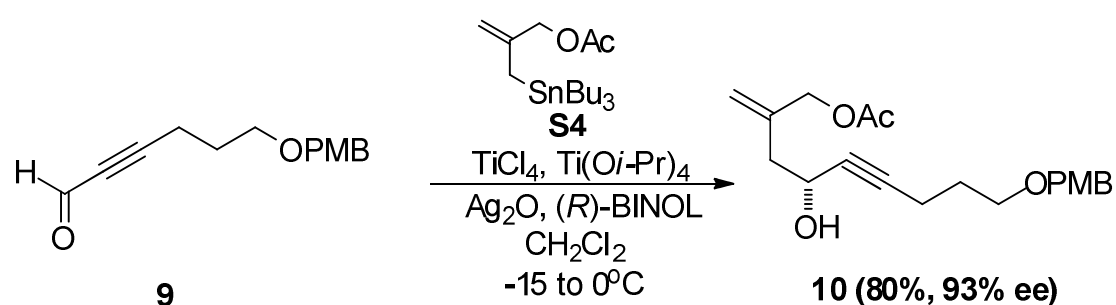

To a stirred solution of  $\text{TiCl}_4$  (22  $\mu\text{L}$ , 0.2 mmol) in  $\text{CH}_2\text{Cl}_2$  (3 mL) at 0  $^\circ\text{C}$  under argon was added  $\text{Ti}(\text{O}i\text{-Pr})_4$  (180  $\mu\text{L}$ , 0.6 mmol). The reaction mixture was allowed to warm to room temperature and stirred for 1 h. Silver(I) oxide  $\text{Ag}_2\text{O}$  (93 mg, 0.4 mmol) was added and the reaction mixture was stirred for 5 h at the same temperature under exclusion of direct light. The reaction mixture was diluted with  $\text{CH}_2\text{Cl}_2$  (8 mL), and (*R*)-BINOL (229 mg, 0.8 mmol) was added. After stirring for 2 h, the reaction mixture was cooled to -15  $^\circ\text{C}$  and a solution of aldehyde **9** (232 mg, 1 mmol) in  $\text{CH}_2\text{Cl}_2$  (2.5 mL) and a solution of allylstannane **S4** (806 mg, 2 mmol) in  $\text{CH}_2\text{Cl}_2$  (2.5 mL) were added sequentially via cannula. The reaction was allowed to warm to 0  $^\circ\text{C}$  and stirred at the same temperature for 10 h. The reaction mixture was quenched with saturated aq  $\text{NaHCO}_3$  and the heterogeneous suspension was filtered through Celite.<sup>®</sup> The Celite<sup>®</sup> was washed thoroughly with  $\text{Et}_2\text{O}$ . The layers were separated and the aqueous layer was extracted three times with  $\text{Et}_2\text{O}$ . The combined organic extracts were washed with water and brine, dried over anhydrous  $\text{Na}_2\text{SO}_4$ , filtered and concentrated under reduced pressure. The residue was purified by flash column chromatography using (hexanes/EtOAc, 2:1) as an eluent to afford alcohol **10** as colorless oil (277 mg, 80% yield, 93% ee):  $[\alpha]_D^{30} = +13.2$  ( $c$  1.1,  $\text{CHCl}_3$ );  $^1\text{H}$  NMR (600 MHz,  $\text{CDCl}_3$ );  $\delta$  7.25 (d,  $J = 8.6$ , 2H), 6.87 (d,  $J = 8.6$ , 2H), 5.17 (d,  $J = 1.4$ , 1H),

5.09 (s, 1H), 4.58 (s, 2H), 4.48-4.46 (m, 1H), 4.43 (s, 2H), 3.79 (s, 3H), 3.50 (t,  $J = 6.2$ , 2H), 2.58 (d,  $J = 5.2$ , 1H), 2.44 (d,  $J = 10.8$ , 2H), 2.31 (td,  $J = 7.1$ , 1.8, 2H), 2.08 (s, 3H), 1.80-1.75 (m, 2H);  $^{13}\text{C}$  NMR (151 MHz,  $\text{CDCl}_3$ );  $\delta$  170.6, 159.0, 139.5, 130.3, 129.1, 115.9, 113.6, 85.0, 80.8, 72.4, 68.2, 66.7, 61.0, 55.1, 41.9, 28.5, 20.8, 15.4; IR (thin film,  $\text{cm}^{-1}$ ) 3414, 1696, 1511, 1172; DART HRMS  $m/z$   $[\text{M}+\text{H}]^+$  calcd for  $\text{C}_{20}\text{H}_{27}\text{O}_5$  347.1858, found 347.1857; HPLC: Daicel CHIRALPAK<sup>®</sup> OD-H column;  $\lambda = 254$  nm; eluent: hexane/isopropanol = 90/10; flow rate: 1.0 mL/min; major enantiomer  $t_R = 18.0$  min, minor enantiomer  $t_R = 20.2$  min; ee = 93%.

**(*R*)-4-((*tert*-Butyldimethylsilyl)oxy)-9-((4-methoxybenzyl)oxy)-2-methylenenon-5-yn-1-yl acetate **11****

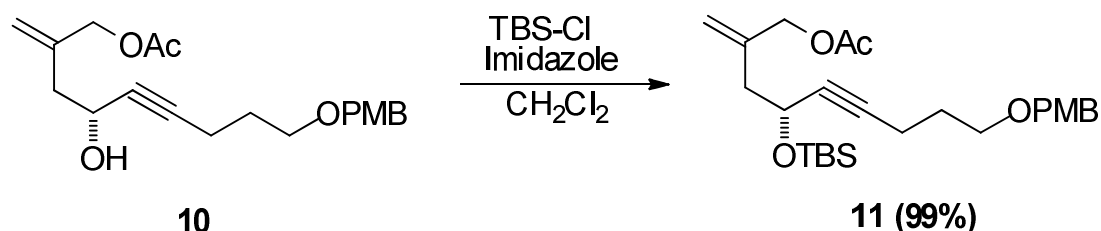

To a solution of alcohol **10** (3.1 g, 8.95 mmol) in  $\text{CH}_2\text{Cl}_2$  (30 mL) were added imidazole (1.8 g, 26.85 mmol) and TBS-Cl (2.7 g, 17.9 mmol) at room temperature. After stirring for 4 h at the same temperature, the reaction mixture was quenched with water. The layers were separated and the aqueous layer was extracted three times with  $\text{CH}_2\text{Cl}_2$ . The combined organic layers were washed with brine, dried over anhydrous  $\text{Na}_2\text{SO}_4$ , filtered and concentrated under reduced pressure. The residue was chromatographed using (hexanes/EtOAc, from 10:1) as an eluent to afford **11** as colorless oil (4.06 g, 99% yield):  $[\alpha]_{\text{D}}^{30} = +22.9$  ( $c$  0.8,  $\text{CHCl}_3$ );  $^1\text{H}$  NMR (400 MHz,  $\text{CDCl}_3$ );  $\delta$  7.16 (d,  $J = 8.7$ , 2H), 6.78 (d,  $J = 8.7$ , 2H), 5.04 (d,  $J = 1.4$ , 1H), 4.95 (s, 1H), 4.48 (s, 2H), 4.39-4.36 (m, 1H), 4.33 (s, 2H), 3.70 (s, 3H), 3.42 (t,  $J = 6.4$ , 2H), 2.31 (d,  $J = 6.4$ , 2H), 2.20 (td,  $J = 7.3$ , 1.8, 2H), 1.99 (s, 3H), 1.69-1.68 (m, 2H), 0.80 (s, 9H), 0.02 (s, 3H), 0.00 (s, 3H);  $^{13}\text{C}$  NMR (101 MHz,  $\text{CDCl}_3$ );  $\delta$  170.5, 159.1, 139.9, 130.5, 129.1, 115.5, 113.7, 84.5, 81.3, 72.6, 68.5, 67.0, 62.4, 55.1, 42.7, 28.7, 25.7, 20.9, 18.1, 15.5, -4.5, -5.1; IR (thin film,  $\text{cm}^{-1}$ ) 1733, 1514, 1249, 1078; DART HRMS  $m/z$   $[\text{M}+\text{H}]^+$  calcd for  $\text{C}_{26}\text{H}_{41}\text{O}_5\text{Si}$  461.2723, found 461.2730.

**(*R*)-*tert*-Butyl((11-((4-methoxybenzyl)oxy)-4-methyleneundec-1-en-7-yn-6-yl)oxy)dimethylsilane **12****

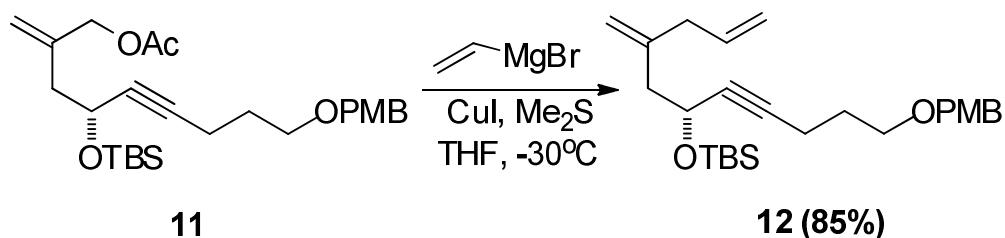

To a stirred solution of **11** (2.3 g, 5 mmol) in THF (18 mL) and dimethylsulfide Me<sub>2</sub>S (1.8 mL) at room temperature under argon, was added CuI (190 mg, 1.0 mmol). The reaction mixture was cooled to -30 °C, and vinylmagnesium bromide (10 mL, 10 mmol, 1.0 M in THF) was added slowly over 20 min. After stirring for 30 min at the same temperature, the reaction was quenched with saturated aq NaHCO<sub>3</sub> and diluted with Et<sub>2</sub>O. The layers were separated and the aqueous layer was extracted three times with Et<sub>2</sub>O. The combined organic extracts were washed with water and brine, dried over anhydrous Na<sub>2</sub>SO<sub>4</sub>, filtered and concentrated under reduced pressure. The residue was purified by flash column chromatography using (hexanes/EtOAc, 20:1) as an eluent to afford dienyne **12** as colorless oil (1.82 g, 85%). [ $\alpha$ ]<sub>D</sub><sup>30</sup> = +22.8 (*c* 0.9, CHCl<sub>3</sub>); <sup>1</sup>H NMR (600 MHz, CDCl<sub>3</sub>);  $\delta$  7.14 (d, *J* = 8.6, 2H), 6.76 (d, *J* = 8.6, 2H), 5.72-5.67 (m, 1H), 4.96-4.95 (m, 2H), 4.77-4.76 (m, 2H), 4.36-4.35 (m, 1H), 4.32 (s, 2H), 3.66 (s, 3H), 3.41 (t, *J* = 6.4, 2H), 2.71 (d, *J* = 6.9, 2H), 2.27-2.26 (m, 2H), 2.20 (td, *J* = 7.0, 1.7, 2H), 1.69-1.65 (m, 2H), 0.81 (s, 9H), 0.03 (s, 3H), 0.00 (s, 3H); <sup>13</sup>C NMR (151 MHz, CDCl<sub>3</sub>);  $\delta$  159.0, 143.7, 136.0, 130.4, 129.0, 116.1, 113.5, 113.3, 84.0, 81.8, 72.5, 68.4, 62.3, 54.9, 45.1, 40.9, 28.7, 25.7, 18.1, 15.4, -4.6, -5.1; IR (thin film, cm<sup>-1</sup>) 2952, 1513, 1248, 1079; DART HRMS *m/z* [M+H]<sup>+</sup> calcd for C<sub>26</sub>H<sub>41</sub>O<sub>3</sub>Si 429.2825, found 429.2827.

**(4*R*,7*aS*)-4-((*tert*-Butyldimethylsilyl)oxy)-3-(3-((4-methoxybenzyl)-oxy)propyl)-6-methylene-5,6,7,7*a*-tetrahydro-1*H*-inden-2(4*H*)-one 13 and (4*R*,7*aR*)-4-((*tert*-butyldimethylsilyl)oxy)-3-(3-((4-methoxybenzyl)-oxy)propyl)-6-methylene-5,6,7,7*a*-tetrahydro-1*H*-inden-2(4*H*)-one 13'**

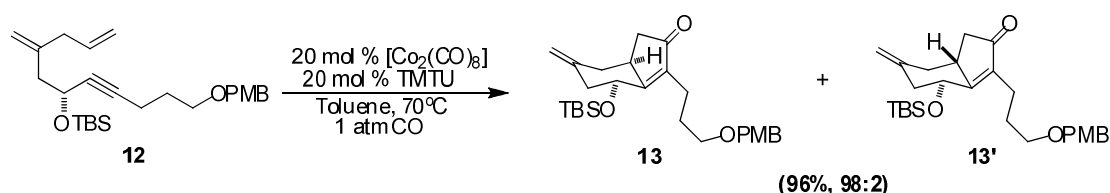

To a stirred solution of dienyne **12** (4.8 g, 11.2 mmol) in toluene (70 mL) were added

Co<sub>2</sub>(CO)<sub>8</sub> (766 mg, 20 mol %) and tetramethylthiourea TMTU (296 mg, 20 mol %) at room temperature. The reaction was stirred for 4 h at 70 °C under 1 atm CO. The black suspension was concentrated under reduced pressure. The residue was chromatographed with (hexanes/EtOAc, 9:1) eluting first **13** as colorless oil (4.8 g, 94%) followed by **13'** as colorless oil (0.1 g, 2%).

**(4*R*,7*aS*)-4-((*tert*-Butyldimethylsilyl)oxy)-3-(3-((4-methoxybenzyl)-oxy)propyl)-6-methylene-5,6,7,7*a*-tetrahydro-1*H*-inden-2(4*H*)-one **13****

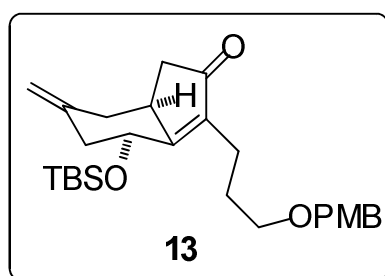

$[\alpha]_D^{30} = -62.1$  (*c* 1.0, CHCl<sub>3</sub>); <sup>1</sup>H NMR (600 MHz, CDCl<sub>3</sub>); δ 7.18 (d, *J* = 7.6, 2H), 6.79 (d, *J* = 7.6, 2H), 4.82 (s, 2H), 4.71 (s, 1H), 4.34 (s, 2H), 3.72 (s, 3H), 3.36-3.33 (m, 2H), 2.98-2.96 (m, 1H), 2.65 (dd, *J* = 6.5, 3.4, 1H), 2.47 (dd, *J* = 19.2, 6.5, 1H), 2.41 (d, *J* = 13.7, 1H), 2.23-2.22 (m, 2H), 2.09 (d, *J* = 13.7, 1H), 1.88 (d, *J* = 19.2, 1H), 1.71-1.70 (m, 1H), 1.62-1.60 (m, 2H), 0.78 (s, 9H), 0.00 (s, 3H), -0.11 (s, 3H); <sup>13</sup>C NMR (151 MHz, CDCl<sub>3</sub>); δ 209.1, 173.9, 159.0, 141.8, 136.1, 130.5, 129.0, 113.6, 112.5, 72.3, 69.1, 65.0, 55.1, 43.4, 43.3, 41.1, 36.6, 28.4, 25.5, 19.5, 17.9, -4.8, -4.9; IR (thin film, cm<sup>-1</sup>) 2928, 1702, 1247, 1071; DART HRMS *m/z* [M+H]<sup>+</sup> calcd for C<sub>27</sub>H<sub>41</sub>O<sub>4</sub>Si 457.2774, found 457.2770.

**(4*R*,7*aR*)-4-((*tert*-Butyldimethylsilyl)oxy)-3-(3-((4-methoxy-benzyl)oxy)-propyl)-6-methylene-5,6,7,7*a*-tetrahydro-1*H*-inden-2(4*H*)-one **13'****

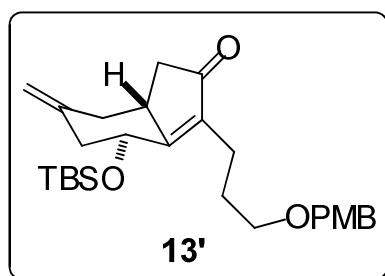

$[\alpha]_D^{25} = +21.0$  (*c* 3.1, CHCl<sub>3</sub>); <sup>1</sup>H NMR (600 MHz, CDCl<sub>3</sub>); δ 7.25-7.23 (m, 2H), 6.85 (d, *J* = 8.6, 2H), 4.83 (s, 2H), 4.47 (dd, *J* = 11.7, 5.5, 1H), 4.41 (d, *J* = 11.6, 1H), 4.39 (d, *J* = 11.6, 1H), 3.79 (s, 3H), 3.42 (t, *J* = 7.0, 2H), 2.64-2.60 (m, 2H), 2.54-2.52 (m, 3H), 2.48-2.45 (m, 1H), 2.24 (t, *J* = 11.9, 1H), 1.96 (d, *J* = 17.2, 1H), 1.77-1.71 (m, 2H), 1.64-1.62 (m, 1H), 0.92 (s, 9H), 0.13 (s, 3H), 0.11 (s, 3H); <sup>13</sup>C NMR (151 MHz, CDCl<sub>3</sub>); δ 208.4, 173.0, 159.0, 143.2, 138.0, 130.8, 129.3, 113.6, 111.6, 74.3, 72.3, 70.0, 55.2, 45.8, 42.8, 40.5, 39.1, 29.7, 25.9, 19.4, 18.2, -4.6, -5.0; IR (thin film, cm<sup>-1</sup>) 2952, 1702, 1243, 1093; DART HRMS *m/z* [M+H]<sup>+</sup> calcd for C<sub>27</sub>H<sub>41</sub>O<sub>4</sub>Si 457.2774, found 457.2779.

**(4*R*,7*aS*)-4-Hydroxy-3-(3-((4-methoxybenzyl)oxy)propyl)-6-methylene-5,6,7,7*a*-tetrahydro-1*H*-inden-2(4*H*)-one **14****

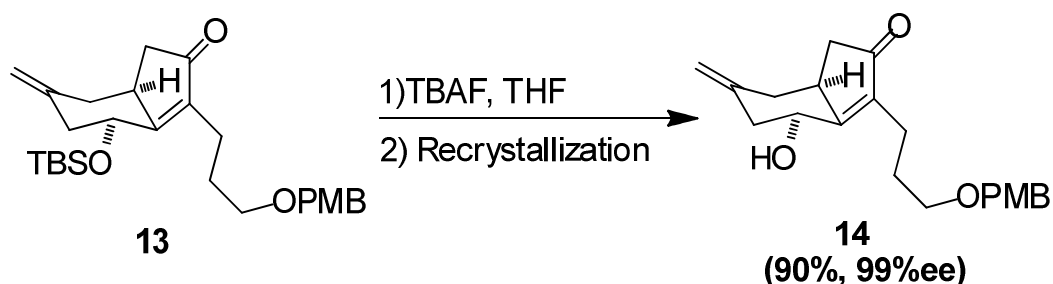

To a solution of indenone **13** (1.63 g, 3.6 mmol) in THF (36 mL) at room temperature was added tetrabutylammonium fluoride TBAF (5.4 mL, 5.4 mmol, 1.0 M in THF). After stirring for 3 h at the same temperature, the reaction was quenched with saturated aq  $\text{NH}_4\text{Cl}$  and diluted by addition of EtOAc. The layers were separated and the aqueous layer was extracted three times with EtOAc. The combined organic extracts were washed with water and brine, dried over anhydrous  $\text{Na}_2\text{SO}_4$ , filtered and concentrated under reduced pressure. The residue was chromatographed with (hexanes/EtOAc, 2:1) as an eluent. The crude eluted fractions were evaporated and the remaining solid residue was recrystallized from (EtOAc/hexanes) to give **14** as colorless needles (1.1 g, 90%, 99% ee):  $[\alpha]_{\text{D}}^{30} = -117.7$  ( $c$  1.0,  $\text{CHCl}_3$ ); mp = 68-69 °C;  $^1\text{H}$  NMR (600 MHz,  $\text{CDCl}_3$ );  $\delta$  7.23 (d,  $J = 8.6$ , 2H), 6.86 (d,  $J = 8.6$ , 2H), 4.98 (brs, 1H), 4.91-4.90 (m, 2H), 4.40 (d,  $J = 11.3$ , 1H), 4.38 (d,  $J = 11.3$ , 1H), 3.79 (s, 3H), 3.41 (t,  $J = 6.2$ , 2H), 3.04-3.00 (m, 1H), 2.79 (d,  $J = 4.8$ , 1H), 2.73 (dd,  $J = 12.7, 4.5$ , 1H), 2.60-2.53 (m, 2H), 2.32-2.30 (m, 3H), 1.97 (dd,  $J = 18.7, 1.9$ , 1H) 1.77-1.72 (m, 3H);  $^{13}\text{C}$  NMR (151 MHz,  $\text{CDCl}_3$ );  $\delta$  208.7, 172.8, 159.0, 141.6, 137.6, 130.1, 129.2, 113.7, 113.5, 72.0, 68.7, 64.2, 55.1, 42.5, 42.0, 41.0, 36.7, 27.7, 19.2; IR (thin film,  $\text{cm}^{-1}$ ) 3411, 1697, 1512, 1247, 1036; DART HRMS  $m/z$   $[\text{M}+\text{H}]^+$  calcd for  $\text{C}_{21}\text{H}_{27}\text{O}_4$  343.1909, found 343.1906; HPLC: Daicel CHIRALPAK<sup>®</sup> OD-H column;  $\lambda = 254$  nm; eluent: hexane/isopropanol = 94/6; flow rate: 1.0 mL/min; major enantiomer  $t_{\text{R}} = 32.9$  min; ee = 99%.

**(4*R*,6*R*,7*aS*)-4-Hydroxy-3-(3-((4-methoxybenzyl)oxy)propyl)-6-methyl-5,6,7,7*a*-tetrahydro-1*H*-inden-2(4*H*)-one 15**

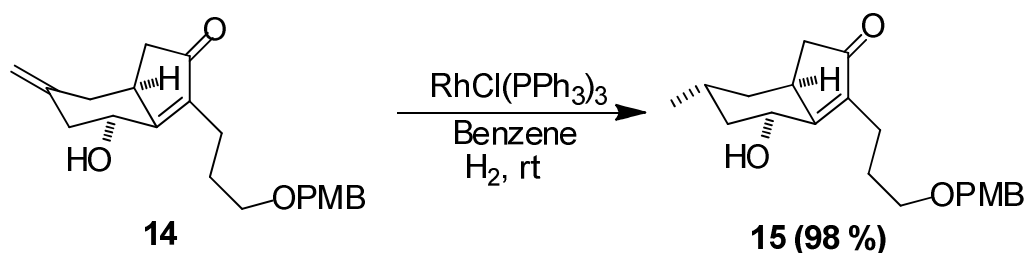



To a stirred solution of **14** (5.5 g, 16 mmol) in benzene (60 mL) at room temperature was added  $\text{RhCl}(\text{PPh}_3)_3$  (740 mg, 5 mol %). The reaction was stirred for 6 h at room temperature under 1 atm  $\text{H}_2$ . The brown mixture was concentrated under reduced pressure and the residue was chromatographed with (hexanes/EtOAc, 1:1) as an eluent to give **15** as colorless oil (5.4 g, 98%):  $[\alpha]_D^{25} = -80.4$  ( $c$  2.2,  $\text{CHCl}_3$ );  $^1\text{H}$  NMR (600 MHz,  $\text{CDCl}_3$ );  $\delta$  7.22 (d,  $J = 8.6$ , 2H), 6.87 (d,  $J = 8.6$ , 2H), 4.83 (brs, 1H), 4.40 (d,  $J = 11.7$ , 1H), 4.36 (d,  $J = 11.7$ , 1H), 3.80 (s, 3H), 3.41 (t,  $J = 5.3$ , 2H), 3.17-3.14 (m, 1H), 3.07 (s, 1H), 2.57 (dd,  $J = 18.9$ , 6.5, 1H), 2.31 (dd,  $J = 6.8$ , 6.5, 2H), 2.01-2.00 (m, 1H), 1.95-1.90 (m, 3H), 1.78-1.71 (m, 3H), 1.28-1.27 (m, 4H);  $^{13}\text{C}$  NMR (151 MHz,  $\text{CDCl}_3$ );  $\delta$  209.6, 175.1, 159.2, 137.4, 129.9, 129.3, 113.7, 71.8, 68.4, 64.2, 55.2, 41.5, 40.2, 37.9, 31.0, 27.0, 26.9, 20.5, 19.1; IR (thin film,  $\text{cm}^{-1}$ ) 3426, 1701, 1512, 1174; DART HRMS  $m/z$   $[\text{M}+\text{H}]^+$  calcd for  $\text{C}_{21}\text{H}_{29}\text{O}_4$  345.2065, found 345.2064.

**(3a*S*,4*R*,6a*S*,8*R*,9a*R*)-2-Ethoxy-4-(3-((4-methoxybenzyl)oxy)propyl)-8-methyloctahydroindeno[4,3a-*b*]furan-5(4*H*)-one **16****

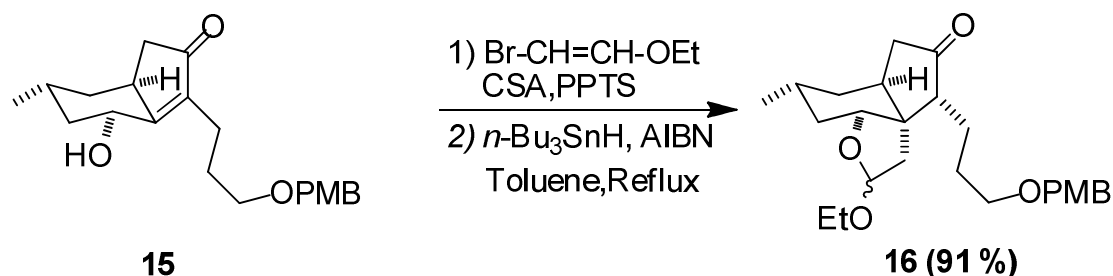

Pyridinium *p*-toluenesulfonate PPTS (263 mg, 1.05 mmol) and camphorsulfonic acid CSA (244 mg, 1.05 mmol) were added to a solution of alcohol **15** (1.8 g, 5.23 mmol) and (*Z/E*)-2-bromovinyl ethyl ether<sup>3</sup> (3.15 g, 20.9 mmol) at room temperature. After stirring for 2 h, the reaction was diluted by  $\text{Et}_2\text{O}$  and quenched with saturated aq  $\text{NaHCO}_3$  at 0 °C. The layers were separated and the aqueous layer was extracted three times with  $\text{Et}_2\text{O}$ . The combined organic layers were washed with water and brine, dried over anhydrous  $\text{Na}_2\text{SO}_4$ , filtered and concentrated under reduced pressure. The residue was passed through a short pad of silica gel using (hexanes/EtOAc, from 10:1 to 3:1) as an eluent. The crude eluted fractions were evaporated and dissolved in toluene. Tributyltin hydride  $n\text{-Bu}_3\text{SnH}$  (7.0 mL, 26.15 mmol) and Azobisisobutyronitrile AIBN were added (0.43 g, 2.62 mmol) at room

(3) (*Z/E*)-2-Bromovinyl ethyl ether was freshly prepared as described by Stalick, W. M.; Khorrami, A.; Hatton, K. S. *J. Org. Chem.* **1986**, *51*, 3577.

temperature. The reaction was heated under reflux for 4 h. The solvent was evaporated under reduced pressure and the residue was chromatographed with (hexanes/EtOAc, from 6:1 to 2:1) to afford cyclic acetal **16** as colorless oil (1.97 g, 91%, two diastereomers, 3:1):  $[\alpha]_D^{25} = +3.4$  ( $c$  1.9,  $\text{CHCl}_3$ );  $^1\text{H}$  NMR (600 MHz,  $\text{CDCl}_3$ , major isomer);  $\delta$  7.25-7.24 (m, 2H), 6.87 (d,  $J = 8.6$ , 2H), 5.12 (dd,  $J = 5.7$ , 2.6, 1H), 4.41 (s, 2H), 3.95 (t,  $J = 5.3$ , 1H), 3.80 (s, 3H), 3.75-3.71 (m, 1H), 3.46-3.41 (m, 3H), 2.44 (dd,  $J = 19.2$ , 8.9, 1H), 2.36-2.35 (m, 1H), 2.26 (dd,  $J = 9.3$ , 4.8, 1H), 2.00-1.96 (m, 2H), 1.89-1.87 (m, 2H), 1.77-1.73 (m, 2H), 1.68-1.64 (m, 1H), 1.53-1.45 (br m, 3H), 1.39-1.34 (m, 1H), 1.28-1.25 (m, 1H), 1.17 (t,  $J = 7.0$ , 3H), 1.07 (d,  $J = 6.9$ , 3H);  $^{13}\text{C}$  NMR (151 MHz,  $\text{CDCl}_3$ , major isomer);  $\delta$  219.4, 159.1, 130.6, 129.2, 113.7, 102.0, 78.7, 72.4, 69.9, 62.9, 55.2, 52.3, 50.0, 42.1, 38.0, 33.8, 33.6, 33.4, 27.8, 24.9, 23.2, 20.7, 15.3; IR (thin film,  $\text{cm}^{-1}$ ) 2924, 1736, 1513, 1247, 1098; DART HRMS  $m/z$   $[\text{M}+\text{H}]^+$  calcd for  $\text{C}_{25}\text{H}_{37}\text{O}_5$  417.2641, found 417.2639.

**(3a*S*,6a*S*,8*R*,9a*R*)-2-Ethoxy-4-(3-((4-methoxybenzyl)oxy)propyl)-8-methyl-2,3,6,6a,7,8,9,9a-octahydroindeno[4,3a-*b*]furan-5-yl acetate **17****

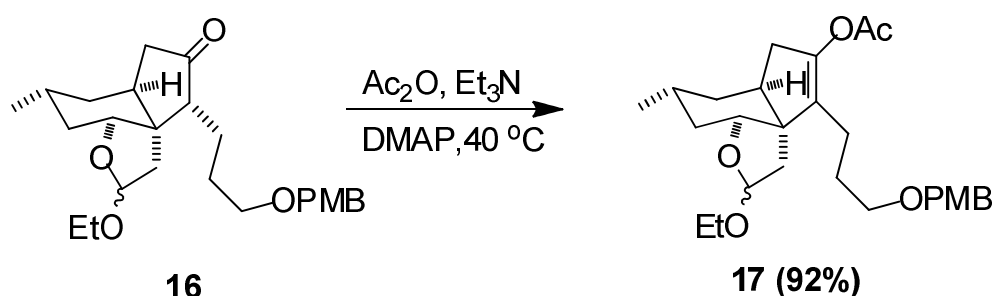

Dimethylaminopyridine DMAP (410.5 mg, 3.36 mmol) and  $\text{Et}_3\text{N}$  (11.6 mL, 84 mmol) were added to a solution of **16** (3.5 g, 8.4 mmol) and acetic anhydride<sup>4</sup> (23.8 mL, 252 mmol) at room temperature. The reaction mixture was stirred at 40 °C for 48 h. The color changed from pale yellow to dark brown during the course of the reaction. The reaction was diluted by EtOAc at 0 °C and quenched with saturated aq  $\text{NaHCO}_3$ . The heterogeneous mixture was filtered through Celite<sup>®</sup> and the Celite<sup>®</sup> was washed thoroughly with EtOAc. The layers were separated and the aqueous layer was extracted three times with EtOAc. The combined organic layers were washed with saturated aq copper(II) sulfate and brine, dried over anhydrous  $\text{Na}_2\text{SO}_4$ ,

(4) Acetic anhydride was distilled from  $\text{K}_2\text{CO}_3$  prior to use.

filtered and concentrated under reduced pressure. The residue was purified by column chromatography using (hexanes/EtOAc, from 9:1 to 6:1) as an eluent to afford vinyl acetate derivative **17** as pale yellow oil (3.54 g, 92%, two diastereomers, 3:1):  $[\alpha]_D^{24} = -13.1$  ( $c$  1.5,  $\text{CHCl}_3$ );  $^1\text{H}$  NMR (600 MHz,  $\text{CDCl}_3$ , major isomer);  $\delta$  7.26 (d,  $J = 8.6$ , 2H), 6.87 (d,  $J = 8.6$ , 2H), 5.11 (dd,  $J = 6.0$ , 3.3, 1H), 4.41 (s, 2H), 4.05 (t,  $J = 4.6$ , 1H), 3.80 (s, 3H), 3.75-3.73 (m, 1H), 3.45-3.40 (m, 3H), 2.57 (dd,  $J = 15.1$ , 7.9, 1H), 2.18-2.13 (br m, 5H), 2.08 (s, 3H), 1.92 (dd,  $J = 13.9$ , 3.3, 1H), 1.77-1.68 (m, 4H), 1.60-1.56 (m, 1H), 1.48-1.46 (m, 1H), 1.39-1.34 (m, 1H), 1.17 (t,  $J = 7.0$ , 3H), 1.03 (d,  $J = 6.9$ , 3H);  $^{13}\text{C}$  NMR (151 MHz,  $\text{CDCl}_3$ , major isomer);  $\delta$  168.7, 159.0, 146.1, 130.7, 129.1, 128.4, 113.7, 102.2, 78.0, 72.3, 69.8, 63.1, 55.2, 54.1, 44.0, 39.0, 35.3, 33.7, 32.7, 28.5, 23.9, 21.7, 20.8, 20.5, 15.3; IR (thin film,  $\text{cm}^{-1}$ ) 3292, 1754, 1512, 1246, 1100; DART HRMS  $m/z$   $[\text{M}+\text{H}]^+$  calcd for  $\text{C}_{27}\text{H}_{39}\text{O}_6$  459.2747, found 459.2749.

**(3a*R*,4*R*,6a*S*,8*R*,9a*R*)-2-Ethoxy-4-hydroxy-4-(3-((4-methoxybenzyl)-oxy)propyl)-8-methyloctahydroindeno[4,3a-*b*]furan-5(4*H*)-one **18****

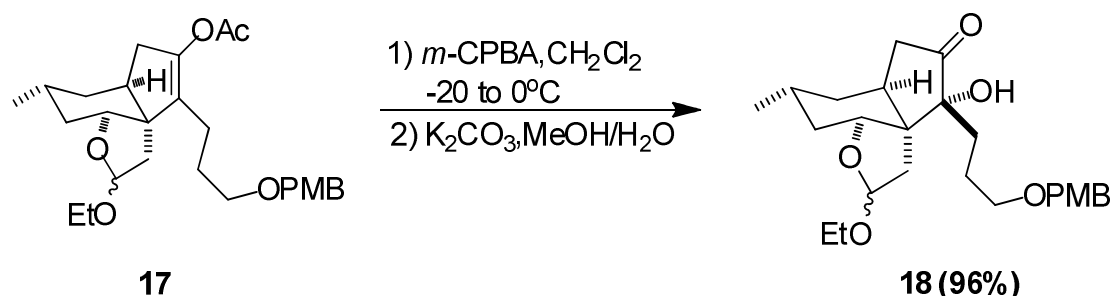

To a solution of **17** (2.0 g, 4.36 mmol) in  $\text{CH}_2\text{Cl}_2$  (40 mL) at  $-20^\circ\text{C}$  was added a solution of *m*-CPBA<sup>5</sup> (2.26 g, 13.0 mmol) in  $\text{CH}_2\text{Cl}_2$  (25 mL). The reaction mixture was gradually warmed to  $0^\circ\text{C}$  and stirred for 2 h at the same temperature. The reaction was quenched with saturated aq  $\text{NaHCO}_3$  and  $\text{Na}_2\text{S}_2\text{O}_3$ . The layers were separated and the aqueous layer was extracted three times with  $\text{CH}_2\text{Cl}_2$ . The combined organic layers were washed with water and brine, dried over anhydrous  $\text{Na}_2\text{SO}_4$ , filtered and concentrated under reduced pressure. The residue was dissolved in  $\text{MeOH}/\text{H}_2\text{O}$  (15 mL: 1.5 mL). Potassium carbonate  $\text{K}_2\text{CO}_3$  (241 mg, 1.74 mmol) was added and the reaction mixture was stirred for 4 h at room temperature. The reaction mixture was partitioned between EtOAc and brine. The

(5) *m*-CPBA was purified and recrystallized from  $\text{CH}_2\text{Cl}_2$  as described by Traylor, T. G.; Miksztal, A. R. *J. Am. Chem. Soc.* **1987**, 109, 2770.

layers were separated and the aqueous layer was extracted three times with EtOAc. The combined organic layers were dried over anhydrous  $\text{Na}_2\text{SO}_4$ , filtered and concentrated under reduced pressure. The residue was purified by flash column chromatography using (hexanes/EtOAc, 4:1) as an eluent to give  $\alpha$ -hydroxy ketone **18** as colorless oil (1.8 g, 96% yield, two diastereomers, 3:1):  $[\alpha]^{24}_{\text{D}} = +42.5$  ( $c$  0.5,  $\text{CHCl}_3$ );  $^1\text{H}$  NMR (400 MHz,  $\text{CDCl}_3$ , major isomer);  $\delta$  7.23 (d,  $J = 8.7$ , 2H), 6.87 (d,  $J = 8.7$ , 2H), 5.05 (dd,  $J = 6.4$ , 4.6, 1H), 4.94 (s, 1H), 4.49 (d,  $J = 11.4$ , 1H), 4.42 (d,  $J = 11.4$ , 1H), 3.80 (s, 3H), 3.77-3.74 (m, 1H), 3.55-3.53 (m, 2H), 3.45-3.42 (m, 2H), 2.83-2.80 (m, 1H), 2.71 (dd,  $J = 14.7$ , 6.4, 1H), 2.63 (dd,  $J = 19.5$ , 10.3, 1H), 2.15-2.10 (m, 1H), 2.04-1.92 (m, 1H), 1.87-1.84 (m, 4H), 1.51-1.44 (m, 4H), 1.35-1.31 (m, 1H), 1.21 (t,  $J = 7.1$ , 3H), 0.92 (d,  $J = 5.5$ , 3H);  $^{13}\text{C}$  NMR (151 MHz,  $\text{CDCl}_3$ , major isomer);  $\delta$  215.8, 159.3, 129.6, 129.5, 113.8, 104.5, 80.4, 77.4, 72.7, 70.8, 63.5, 56.0, 55.2, 39.5, 39.2, 34.8, 33.6, 32.9, 28.3, 24.0, 22.9, 21.9, 15.4; IR (thin film,  $\text{cm}^{-1}$ ) 3357, 1741, 1246, 1090; DART HRMS  $m/z$   $[\text{M}+\text{H}]^+$  calcd for  $\text{C}_{25}\text{H}_{37}\text{O}_6$  433.25901, found 433.25905.

**(3a*R*,4*R*,5*R*,6a*S*,8*R*,9a*R*)-2-Ethoxy-4-(3-((4-methoxybenzyl)oxy)-propyl)-8-methyldecahydroindeno[4,3a-b]furan-4,5-diol **19****

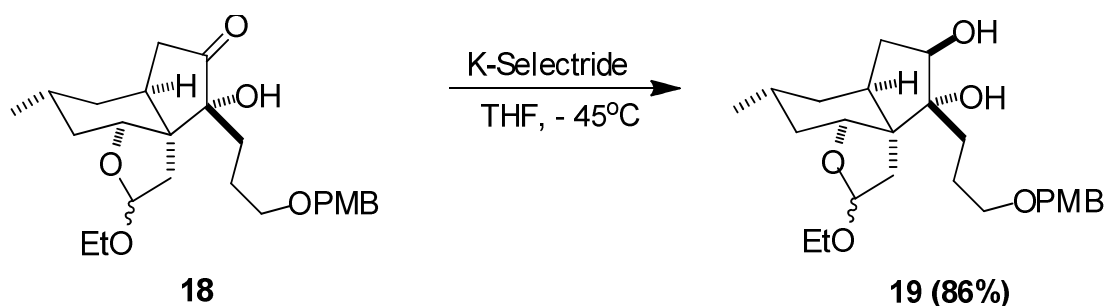

K-Selectride (5.5 mL, 5.5 mmol, 1.0M solution in THF) was added dropwise to a solution of **18** (1.8 g, 4.16 mmol) in THF (40 mL) at  $-45^\circ\text{C}$  under argon. After stirring for 6h at the same temperature, the reaction was quenched with 3 M aq NaOH and 30% aq  $\text{H}_2\text{O}_2$ . The mixture was diluted with EtOAc and the layers were separated. The aqueous layer was extracted three times with EtOAc. The combined organic extracts were washed with saturated aq  $\text{Na}_2\text{S}_2\text{O}_3$  and brine, dried over anhydrous  $\text{Na}_2\text{SO}_4$ , filtered and concentrated under reduced pressure. The residue was purified by flash column chromatography using (hexanes/EtOAc, from 2:1 to 1:1) as an eluent to give *trans*-diol **19** as colorless oil (1.54 g, 86% yield, two diastereomers, 3:1):  $[\alpha]^{24}_{\text{D}} = -9.3$  ( $c$  0.8,  $\text{CHCl}_3$ );  $^1\text{H}$  NMR (600 MHz,  $\text{CDCl}_3$ );  $\delta$

7.24-7.23 (m, 2H), 6.88-6.87 (m, 2H), 5.12-5.04 (m, 1H), 4.49-4.45 (m, 3H) 4.00-3.98 (m, 1H), 3.80 (d,  $J = 10.0$ , 3H), 3.77-3.73 (m, 1H), 3.49-3.43 (m, 3H), 2.63-2.62 (m, 1H), 2.54-2.48 (m, 2H), 2.41-2.38 (m, 1H), 2.15-2.08 (m, 2H), 1.83-1.76 (m, 4H), 1.61-1.59 (m, 1H), 1.46-1.44 (m, 1H), 1.34-1.29 (m, 4H), 1.21-1.18 (m, 3H), 0.91-0.89 (m, 3H);  $^{13}\text{C}$  NMR (151 MHz,  $\text{CDCl}_3$ );  $\delta$  159.2, 129.6, 129.5, 129.4, 113.8, 103.9, 102.4, 86.0, 85.6, 77.9, 77.4, 77.2, 72.9, 72.8, 70.6, 70.3, 63.4, 63.3, 57.3, 55.2, 54.8, 40.0, 39.6, 38.4, 37.8, 37.4, 36.8, 36.2, 34.1, 34.0, 28.8, 27.5, 24.3, 23.9, 23.8, 22.1, 22.0, 15.4; IR (thin film,  $\text{cm}^{-1}$ ) 3430, 1512, 1301, 1091; DART HRMS  $m/z$   $[\text{M}+\text{H}]^+$  calcd for  $\text{C}_{25}\text{H}_{39}\text{O}_6$  435.2746, found 435.2742.

**(1*R*,2*R*,3*aS*,5*R*,7*R*,7*aR*)-7*a*-Allyl-1-(3-((4-methoxybenzyl)oxy)-propyl)-5-methyloctahydro-1*H*-indene-1,2,7-triol **20****

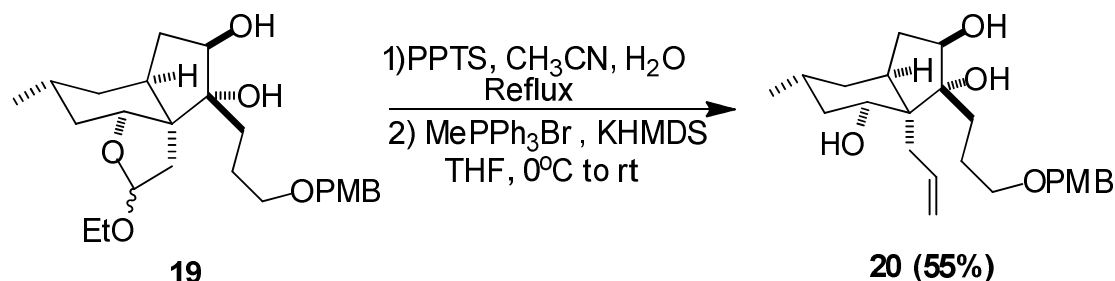

PPTS (123 mg, 0.49 mmol) was added to a solution of **19** (1.06 g, 2.44 mmol) in  $\text{CH}_3\text{CN}/\text{H}_2\text{O}$  (10 mL: 2 mL) at room temperature. The reaction mixture was heated under reflux for 4 h. The reaction was quenched with saturated aq  $\text{NaHCO}_3$  and the mixture was partitioned between EtOAc and brine. The layers were separated and the aqueous layer was extracted three times with EtOAc. The combined organic layers were dried over anhydrous  $\text{Na}_2\text{SO}_4$ , filtered and concentrated under reduced pressure. The residue was passed through a short pad of silica gel using (hexanes/EtOAc, 1:2) as an eluent. The crude eluted fractions were evaporated, dissolved in THF (10 mL) and cooled at  $0^\circ\text{C}$ . In a previously prepared second flask, methyltriphenylphosphonium bromide  $\text{PPh}_3\text{MeBr}$  (6.1 g, 17.08 mmol) was dried at  $80^\circ\text{C}$  under vacuum for 3 hours. After the salt has cooled THF (24 mL) was added and the slurry was cooled to  $0^\circ\text{C}$  under argon. Potassium bis(trimethylsilyl)amide KHMDS (16.8 mL, 16.8 mmol, 1.0 M in THF) was added dropwise at the same temperature resulting in a bright yellow color. After stirring for 30 min at the same temperature, the bright yellow ylide slurry was cannulated to the first reaction flask at  $0^\circ\text{C}$  under argon. The reaction mixture was stirred at the same temperature for 2 h then warmed gradually to room temperature and stirred overnight. The reaction was

quenched with saturated aq  $\text{NH}_4\text{Cl}$  and the mixture was diluted with EtOAc. The layers were separated and the aqueous layer was extracted three times with EtOAc. The combined organic extracts were washed with water and brine, dried over anhydrous  $\text{Na}_2\text{SO}_4$ , filtered and concentrated under reduced pressure. The residue was purified by flash column chromatography with (hexanes/EtOAc, 2:1) as eluent to afford triol **20** as colorless oil (0.54 g, 55% yield):  $[\alpha]_D^{24} = -13.4$  ( $c$  0.8,  $\text{CHCl}_3$ );  $^1\text{H}$  NMR (600 MHz,  $\text{CDCl}_3$ );  $\delta$  7.26-7.24 (m, 2H), 6.87 (d,  $J = 9.3$ , 2H), 6.22-6.15 (m, 1H), 5.14 (dd,  $J = 17.2$ , 1.7, 1H), 5.03 (dd,  $J = 10.0$ , 1.7, 1H), 4.49 (d,  $J = 11.7$ , 1H), 4.46 (d,  $J = 11.7$ , 1H), 4.31-4.27 (m, 1H), 3.94-3.93 (m, 1H), 3.80 (s, 3H), 3.57-3.54 (m, 1H), 3.46 (td,  $J = 8.5$ , 3.9, 1H), 3.33 (d,  $J = 2.7$ , 1H) 2.53-2.49 (m, 2H), 2.35-2.31 (m, 1H), 2.29-2.25 (m, 1H), 2.17 (s, 1H), 2.15-2.10 (m, 1H), 1.93-1.88 (m, 1H), 1.84-1.80 (m, 2H), 1.75-1.74 (m, 1H), 1.67-1.64 (m, 1H), 1.49-1.44 (m, 2H), 1.19-1.16 (m, 2H), 1.12-1.09 (m, 1H), 0.92 (d,  $J = 6.5$ , 3H);  $^{13}\text{C}$  NMR (151 MHz,  $\text{CDCl}_3$ );  $\delta$  159.3, 139.1, 129.8, 129.5, 116.5, 113.8, 89.3, 77.8, 72.8, 70.1, 69.2, 55.2, 53.0, 41.3, 39.7, 36.0, 32.5, 32.1, 29.4, 25.6, 24.0, 22.1; IR (thin film,  $\text{cm}^{-1}$ ) 3424, 1513, 1247, 1035; DART HRMS  $m/z$   $[\text{M}+\text{H}]^+$  calcd for  $\text{C}_{24}\text{H}_{37}\text{O}_5$  405.2641, found 405.2640.

**(2*R*,3*R*,3*aR*,4*R*,6*R*,7*aS*)-3*a*-Allyl-3-hydroxy-3-(3-((4-methoxybenzyl)-oxy)propyl)-6-methyloctahydro-1*H*-indene-2,4-diyl bis(2,2-dimethylpropanoate) **21****

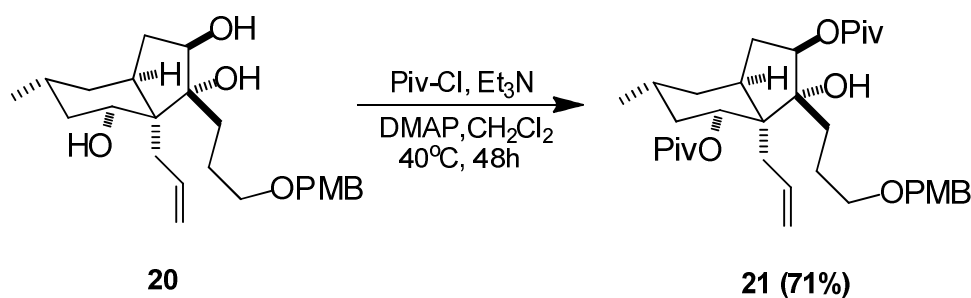

DMAP (35.5 mg, 0.29 mmol) and  $\text{Et}_3\text{N}$  (8 mL, 58 mmol) were added to a solution of triol **20** (235 mg, 0.58 mmol) in  $\text{CH}_2\text{Cl}_2$  (4 mL) at room temperature. The reaction was cooled to 0 °C and pivaloyl chloride (7.1 mL, 58 mmol) was added dropwise. After the addition, the reaction was stirred at 0 °C for 1 h and then warmed to 40 °C and stirred for 48 h. The reaction mixture was diluted with  $\text{CH}_2\text{Cl}_2$  at 0 °C and quenched with saturated aq  $\text{NaHCO}_3$ . The layers were separated and the aqueous layer was extracted three times with  $\text{CH}_2\text{Cl}_2$ . The combined organic layers were

washed with saturated aq copper(II) sulfate and brine, dried over anhydrous  $\text{Na}_2\text{SO}_4$ , filtered and concentrated under reduced pressure. The residue was purified by column chromatography using (hexanes/EtOAc, from 18:1 to 6:1) as an eluent to afford **21** as colorless oil (234.5 mg, 71% yield):  $[\alpha]_D^{25} = -17.8$  ( $c$  3.3,  $\text{CHCl}_3$ );  $^1\text{H}$  NMR (600 MHz,  $\text{CDCl}_3$ );  $\delta$  7.22 (d,  $J = 8.6$ , 2H), 6.86 (d,  $J = 8.6$ , 2H), 6.19-6.15 (m, 1H), 5.22 (dd,  $J = 11.5$ , 4.6, 1H), 5.12 (dd,  $J = 17.0$ , 1.5, 1H), 5.03 (dd,  $J = 10.1$ , 1.5, 1H), 4.80 (dd,  $J = 8.2$ , 3.1, 1H), 4.42 (d,  $J = 11.3$ , 1H), 4.39 (d,  $J = 11.3$ , 1H), 3.80 (s, 3H), 3.48-3.44 (m, 1H), 3.39 (br s, 1H), 3.34-3.30 (m, 1H), 2.65-2.63 (m, 1H), 2.55 (dd,  $J = 15.1$ , 7.2, 1H), 2.50-2.45 (m, 2H), 1.77-1.75 (m, 1H), 1.70-1.66 (m, 3H), 1.62-1.61 (m, 1H), 1.46-1.43 (m, 2H), 1.35-1.31 (m, 2H), 1.21 (s, 9H), 1.17 (s, 9H), 1.11-1.06 (m, 1H), 0.90 (d,  $J = 6.5$ , 3H);  $^{13}\text{C}$  NMR (151 MHz,  $\text{CDCl}_3$ );  $\delta$  177.4, 177.2, 159.2, 138.3, 130.0, 129.3, 116.4, 113.7, 88.1, 79.0, 72.7, 72.4, 70.5, 55.2, 51.8, 40.1, 38.8, 36.5, 35.5, 33.2, 32.6, 30.3, 27.1, 27.0, 26.8, 25.2, 24.0, 21.9; IR (thin film,  $\text{cm}^{-1}$ ) 3443, 2924, 1721, 1158; DART HRMS  $m/z$   $[\text{M}+\text{H}]^+$  calcd for  $\text{C}_{34}\text{H}_{53}\text{O}_7$  573.3791, found 573.3794.

**(2*R*,3*R*,3*aR*,4*R*,6*R*,7*aS*)-3-Hydroxy-3*a*-(3-hydroxypropyl)-3-(3-((4-methoxybenzyl)oxy)propyl)-6-methyloctahydro-1*H*-indene-2,4-diyl bis(2,2-dimethylpropanoate) **22****

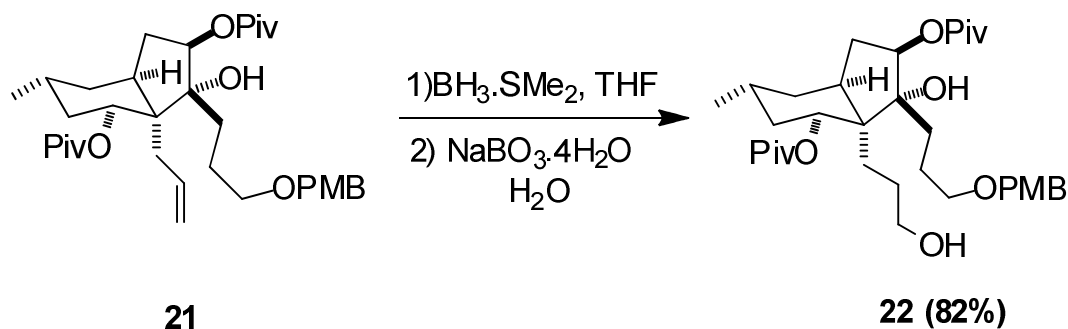

Borane dimethyl sulfide complex  $\text{BH}_3\cdot\text{SMe}_2$  (0.5 mL, 4.95 mmol) was added to a solution of allyl derivative **21** (566 mg, 0.99 mmol) in THF (10 mL) at 0 °C under argon. After stirring for 2 h at the same temperature, water  $\text{H}_2\text{O}$  (2 mL) and  $\text{NaBO}_3\cdot 4\text{H}_2\text{O}$  (762 mg, 4.95 mmol) were added. The reaction was warmed to room temperature and stirred for 4 h. The reaction mixture was partitioned between EtOAc and brine and the layers were separated. The aqueous layer was extracted three times with EtOAc. The combined organic layers were dried over anhydrous  $\text{Na}_2\text{SO}_4$ , filtered and concentrated under reduced pressure. The residue was chromatographed

using (hexanes/EtOAc, from 2:1 to 1:1) as an eluent to afford primary alcohol **22** as colorless oil (480 mg, 82% yield):  $[\alpha]_D^{25} = -19.8$  ( $c$  3.0,  $\text{CHCl}_3$ );  $^1\text{H}$  NMR (600 MHz,  $\text{CDCl}_3$ );  $\delta$  7.23 (d,  $J = 8.2$ , 2H), 6.87 (d,  $J = 8.2$ , 2H), 5.21 (dd,  $J = 11.5$ , 4.6, 1H), 4.81 (dd,  $J = 8.9$ , 3.4, 1H), 4.43 (d,  $J = 11.5$ , 1H), 4.39 (d,  $J = 11.5$ , 1H), 3.81 (s, 3H), 3.64-3.63 (m, 2H), 3.50-3.47 (m, 2H), 3.33-3.31 (m, 1H), 2.65-2.62 (m, 1H), 2.51-2.45 (m, 1H), 1.95-1.93 (m, 1H), 1.77-1.69 (m, 4H), 1.66-1.61 (m, 5H), 1.50-1.48 (m, 2H), 1.32-1.26 (m, 3H), 1.21 (s, 9H), 1.16 (s, 9H), 0.89 (d,  $J = 6.5$ , 3H);  $^{13}\text{C}$  NMR (151 MHz,  $\text{CDCl}_3$ );  $\delta$  177.4, 177.3, 159.3, 129.8, 129.4, 113.8, 87.9, 79.5, 72.8, 72.7, 70.5, 64.3, 55.3, 50.9, 40.4, 38.8, 38.5, 36.6, 35.6, 33.5, 30.2, 29.2, 27.1, 26.8, 25.2, 24.6, 24.1, 21.9; IR (thin film,  $\text{cm}^{-1}$ ) 3426, 1721, 1284, 1156; DART HRMS  $m/z$   $[\text{M}+\text{H}]^+$  calcd for  $\text{C}_{34}\text{H}_{55}\text{O}_8$  591.3897, found 591.3890.

**(2*R*,3*R*,3*aR*,4*R*,6*R*,7*aS*)-3-Hydroxy-3-(3-((4-methoxybenzyl)-oxy)propyl)-3*a*-(3-(*N*-(methoxymethoxy)-2-nitrophenylsulfonamido)-propyl)-6-methyloctahydro-1*H*-indene-2,4-diyl bis(2,2-dimethylpropanoate) **23****

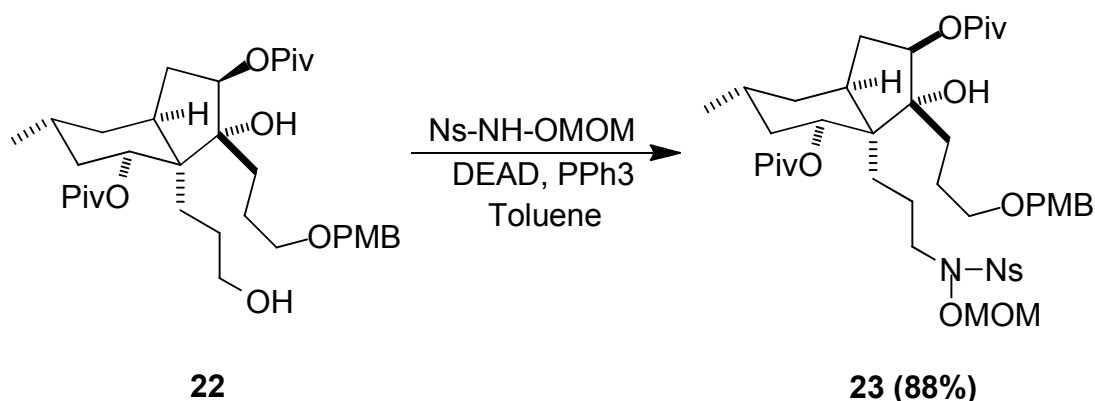

*N*-(Methoxymethoxy)-2-nitrobenzenesulfonamide<sup>6</sup> **S5**  $\text{Ns-NH-OMOM}$  (47 mg, 0.18 mmol) and triphenylphosphine (168 mg, 0.64 mmol) were added to a solution of primary alcohol **22** (94 mg, 0.16 mmol) in toluene (3 mL) at  $-20\text{ }^\circ\text{C}$ . Diethyl azodicarboxylate DEAD (348  $\mu\text{L}$ , 0.8 mmol, 40% in toluene) was added dropwise to the reaction mixture at the same temperature. The yellow suspension was warmed gradually to room temperature and stirred for 1 h. The orange suspension was concentrated under reduced pressure and the residue was chromatographed with (hexanes/ $\text{Et}_2\text{O}$ , from 1:1 to 1:2) to afford **23** as pale yellow oil (114 mg, 88%):  $[\alpha]_D^{25}$

(6) *N*-(Methoxymethoxy)-2-nitrobenzenesulfonamide **S5** was prepared as described by Canham, S. M.; France, D. J.; Overman, L. E. *J. Am. Chem. Soc.* **2010**, *132*, 7876.



= -39.2 (*c* 1.5, CHCl<sub>3</sub>); <sup>1</sup>H NMR (600 MHz, CDCl<sub>3</sub>); δ 8.04 (dd, *J* = 7.9, 1.0, 1H), 7.79-7.72 (m, 2H), 7.59 (dd, *J* = 7.7, 1.2, 1H), 7.20 (d, *J* = 8.6, 2H), 6.86 (d, *J* = 8.6, 2H), 5.19 (dd, *J* = 11.5, 4.6, 1H), 5.02 (d, *J* = 8.3, 1H), 4.99 (d, *J* = 8.3, 1H), 4.79 (dd, *J* = 8.6, 3.1, 1H), 4.40 (d, *J* = 11.0, 1H), 4.38 (d, *J* = 11.0, 1H), 3.80 (s, 3H), 3.49-3.44 (m, 1H), 3.43 (s, 3H), 3.33-3.32 (m, 1H), 3.24-3.23 (m, 2H), 2.62-2.58 (m, 1H), 2.49-2.45 (m, 1H), 2.07-2.04 (m, 1H), 1.78-1.75 (m, 3H), 1.63-1.62 (m, 3H), 1.49-1.43 (m, 2H), 1.29-1.26 (m, 4H), 1.21 (s, 9H), 1.15 (s, 9H), 1.10-1.06 (m, 2H), 0.89 (d, *J* = 6.5, 3H); <sup>13</sup>C NMR (151 MHz, CDCl<sub>3</sub>); δ 177.4, 177.3, 159.2, 149.8, 134.8, 132.3, 130.9, 130.0, 129.2, 126.6, 123.8, 113.7, 102.7, 87.9, 79.3, 72.7, 72.6, 70.5, 57.6, 55.3, 54.5, 51.0, 39.8, 38.8, 36.5, 35.5, 33.3, 30.2, 29.7, 27.1, 26.8, 25.5, 25.2, 24.2, 23.2, 21.8; IR (thin film, cm<sup>-1</sup>) 3372, 2923, 1722, 1178; DART HRMS *m/z* [M+H]<sup>+</sup> calcd for C<sub>42</sub>H<sub>63</sub>N<sub>2</sub>O<sub>13</sub>S 835.4051, found 835.4050.

**(2*R*,3*R*,3*aR*,4*R*,6*R*,7*aS*)-3-Hydroxy-3-(3-hydroxypropyl)-3*a*-(3-(*N*-(methoxymethoxy)-2-nitrophenylsulfonamido)propyl)-6-methyloctahydro-1*H*-indene-2,4-diyl bis(2,2-dimethylpropanoate) 24**

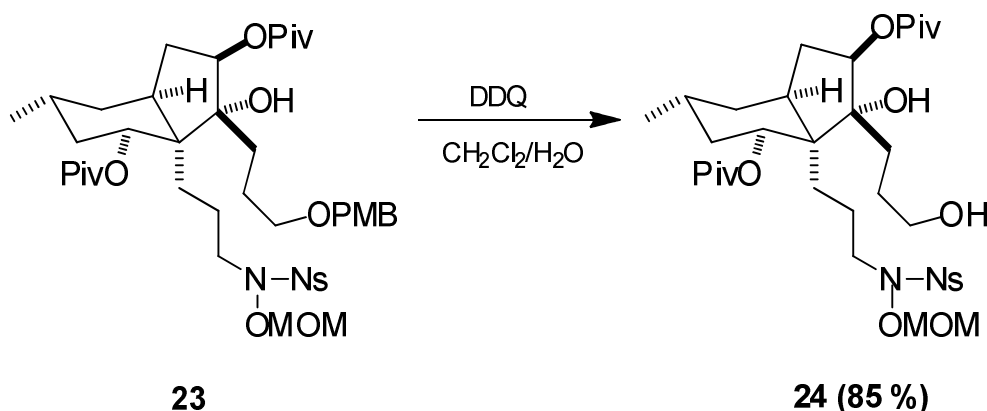

2,3-Dichloro-5,6-dicyano-1,4-benzoquinone DDQ (102 mg, 0.45 mmol) was added to a solution of **23** (250 mg, 0.3 mmol) in CH<sub>2</sub>Cl<sub>2</sub>/H<sub>2</sub>O (4 mL: 1 mL) at room temperature. After stirring for 4 h at the same temperature, the reaction was quenched with saturated aq NaHCO<sub>3</sub>. The layers were separated and the aqueous layer was extracted three times with CH<sub>2</sub>Cl<sub>2</sub>. The combined organic layers were washed with H<sub>2</sub>O and brine, dried over anhydrous Na<sub>2</sub>SO<sub>4</sub>, filtered and concentrated under reduced pressure. The residue was purified by column chromatography using (hexane/EtOAc, from 1:1 to 1:2) as an eluent to afford diol **24** as pale yellow oil (182 mg, 85% yield):  $[\alpha]_D^{25} = -12.2$  (*c* 0.22, CHCl<sub>3</sub>); <sup>1</sup>H NMR (600 MHz, CDCl<sub>3</sub>); δ 8.05 (dd, *J* = 7.9, 2.1,

1H), 7.82-7.79 (m, 1H), 7.77-7.76 (m, 1H), 7.60 (d,  $J = 7.9$ , 1H), 5.21 (dd,  $J = 11.5$ , 4.6, 1H), 5.06 (d,  $J = 7.9$ , 1H), 5.01 (d,  $J = 7.9$ , 1H), 4.82 (dd,  $J = 8.1$ , 2.9, 1H), 3.70-3.68 (m, 1H), 3.55-3.53 (m, 1H), 3.47 (s, 3H), 3.28-3.21 (m, 3H), 2.62-2.59 (m, 1H), 2.50-2.44 (m, 1H), 2.07-2.05 (m, 1H), 1.84-1.75 (m, 5H), 1.64-1.63 (m, 2H), 1.50-1.44 (m, 2H), 1.34-1.25 (m, 3H), 1.22 (s, 9H), 1.18 (s, 9H), 1.11-1.09 (m, 2H), 0.90 (d,  $J = 6.5$ , 3H);  $^{13}\text{C}$  NMR (151 MHz,  $\text{CDCl}_3$ );  $\delta$  177.5, 177.3, 149.8, 134.9, 132.3, 131.0, 126.6, 123.8, 102.7, 87.9, 79.2, 72.6, 63.3, 57.7, 54.5, 51.0, 39.9, 38.9, 38.6, 36.5, 35.5, 33.3, 29.8, 27.1, 26.8, 25.4, 25.2, 23.1, 21.8, 14.2; IR (thin film,  $\text{cm}^{-1}$ ) 3476, 1721, 1711, 1156; DART HRMS  $m/z$   $[\text{M}+\text{H}]^+$  calcd for  $\text{C}_{34}\text{H}_{55}\text{N}_2\text{O}_{12}\text{S}$  715.3476, found 715.3472.

**(1'*R*,2'*R*,3a'*S*,5'*R*,7'*R*,7a'*R*)-5-Hydroxy-7a'-(3-(*N*-(methoxymethoxy)-2-nitrophenylsulfonamido)propyl)-5'-methyldecahydro-3*H*-spiro[furan-2,1'-indene]-2',7'-diyl bis(2,2-dimethylpropanoate) 25**

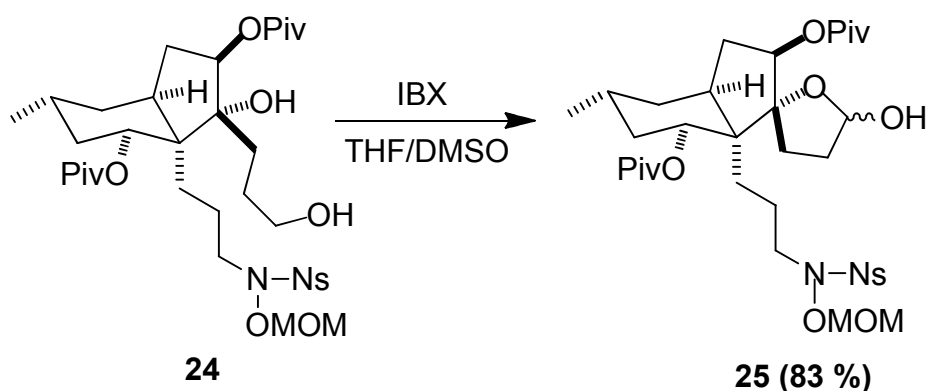

2-Iodoxybenzoic acid IBX<sup>7</sup> (29 mg, 0.105 mmol) was added to a solution of diol **24** (49 mg, 0.07 mmol) in THF/DMSO (1.0 mL: 1.0 mL) at room temperature. After stirring for 6 h at the same temperature, the reaction was quenched with saturated aq  $\text{NaHCO}_3$  and partitioned between EtOAc and brine. The layers were separated and the aqueous layer was extracted three times with EtOAc. The combined organic layers were washed with brine, dried over anhydrous  $\text{Na}_2\text{SO}_4$ , filtered and concentrated under reduced pressure. The residue was purified by column chromatography using (hexanes/EtOAc, 1:1) as an eluent to afford spiroactol **25** as colorless oil (41.5 mg, 83% yield, two diastereomers, 3:1):  $[\alpha]_{\text{D}}^{24} = -8.8$  ( $c$  0.24,  $\text{CHCl}_3$ );  $^1\text{H}$  NMR (400 MHz,  $\text{CDCl}_3$ );  $\delta$  8.08-8.05 (m, 1H), 7.79-7.74 (m, 2H), 7.61-7.60 (m, 1H), 5.46-5.41

(7) IBX was freshly prepared as described by Frigerio, M.; Santagostino, M.; Sputore, S. *J. Org. Chem.* **1999**, *64*, 4537.

(m, 1H), 5.13-5.10 (m, 1H), 5.02-4.97 (m, 2H), 4.80-4.78 (m, 1H), 3.47 (d,  $J = 11.0$ , 3H), 3.28-3.23 (m, 2H), 2.55-2.48 (m, 1H), 2.42-2.38 (m, 1H), 2.21-2.17 (m, 1H), 2.11-2.03 (m, 1H), 1.81-1.77 (m, 4H), 1.70-1.65 (m, 4H), 1.54-1.50 (m, 2H), 1.44-1.32 (m, 2H), 1.22 (d,  $J = 5.5$ , 9H), 1.17 (d,  $J = 1.8$ , 9H), 1.08-1.05 (m, 1H), 0.91-0.89 (m, 3H);  $^{13}\text{C}$  NMR (101 MHz,  $\text{CDCl}_3$ );  $\delta$  177.7, 177.3, 158.4, 145.4, 134.8, 132.3, 132.0, 131.1, 123.9, 123.8, 102.3, 100.0, 99.3, 97.0, 78.1, 72.3, 72.1, 57.8, 55.0, 48.8, 39.3, 38.8, 38.6, 36.1, 34.6, 33.2, 32.9, 31.8, 27.2, 27.1, 26.9, 25.0, 24.3, 23.9, 23.4, 21.9; IR (thin film,  $\text{cm}^{-1}$ ) 3492, 1719, 1283, 1158; DART HRMS  $m/z$   $[\text{M}+\text{H}]^+$  calcd for  $\text{C}_{34}\text{H}_{53}\text{N}_2\text{O}_{12}\text{S}$  713.3319, found 713.3313.

**(1*R*,2*R*,3*a**S*,5*R*,7*R*,7*a**R*)-5-Hydroxy-7*a*'-(3-((methoxymethoxy)-amino)propyl)-5'-methyldecahydro-3*H*-spiro[furan-2,1'-indene]-2',7'-diyl bis(2,2-dimethylpropanoate) 26**

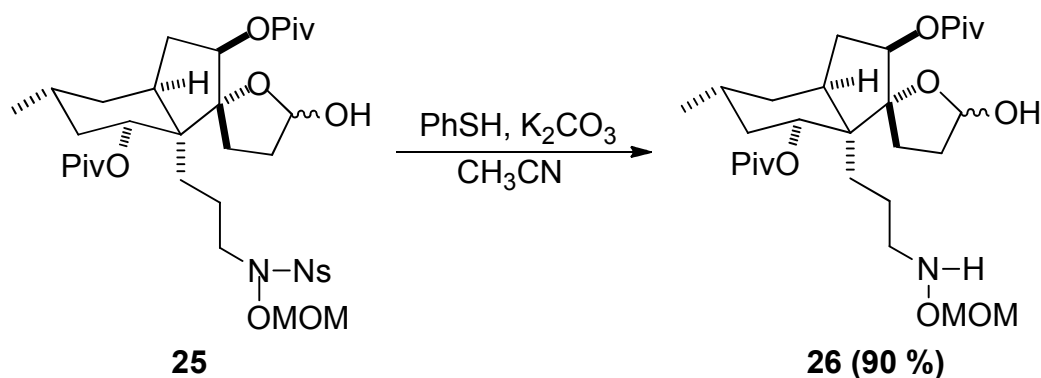

K<sub>2</sub>CO<sub>3</sub> (29.0 mg, 0.21 mmol) and thiophenol PhSH (140  $\mu$ L, 0.14 mmol, 1.0M in CH<sub>3</sub>CN) were added to a solution of **25** (50 mg, 0.07 mmol) in CH<sub>3</sub>CN (4 mL) at room temperature. After stirring for 6 h at the same temperature, the mixture was partitioned between EtOAc and brine. The layers were separated and the aqueous layer was extracted three times with EtOAc. The combined organic layers were washed with brine, dried over anhydrous Na<sub>2</sub>SO<sub>4</sub>, filtered and concentrated under reduced pressure. The residue was purified by column chromatography using (hexanes/EtOAc, from 1:1 to 1:2) as an eluent to afford aminolactol **26** as colorless oil (33.2 mg, 90% yield, two diastereomers, 3:1): [ $\alpha$ ]<sub>D</sub><sup>24</sup> = -6.5 (*c* 0.4, CHCl<sub>3</sub>); <sup>1</sup>H NMR (600 MHz, CDCl<sub>3</sub>);  $\delta$  5.44-5.43 (m, 1H), 5.11-5.09 (m, 1H), 4.82-4.80 (m, 1H), 4.76 (d, *J* = 2.4, 2H), 3.42 (s, 3H), 3.18-3.16 (m, 1H), 2.92-2.87 (m, 1H), 2.56-2.54 (m, 1H), 2.43-2.38 (m, 1H), 2.13-2.09 (m, 1H), 2.06-2.04 (m, 1H), 1.84-1.75 (m, 5H), 1.70-1.63 (m, 2H), 1.54-1.52 (m, 2H), 1.43-1.38 (m, 1H), 1.27-1.25 (m, 1H), 1.23 (d,

$J = 7.2$ , 9H), 1.17 (d,  $J = 9.3$ , 9H), 1.12-1.08 (m, 2H), 0.90-0.89 (m, 4H);  $^{13}\text{C}$  NMR (151 MHz,  $\text{CDCl}_3$ );  $\delta$  177.6, 177.3, 100.2, 99.2, 98.9, 97.0, 78.3, 72.4, 55.9, 53.1, 48.7, 40.0, 39.3, 38.9, 38.6, 36.4, 34.7, 33.3, 33.2, 27.2, 27.1, 26.9, 25.0, 24.5, 23.9, 23.0, 21.9; IR (thin film,  $\text{cm}^{-1}$ ) 3733, 1723, 1151; DART HRMS  $m/z$   $[\text{M}+\text{H}]^+$  calcd for  $\text{C}_{28}\text{H}_{50}\text{NO}_8$  528.3536, found 528.3544.

**(5*S*,7*aR*,8*R*,9*aS*,11*R*,13*R*,13*aR*)-4-(Methoxymethoxy)-11-methyltetradecahydro-5,7*a*-epoxyindeno[1,7*a*-e]azonine-8,13-diyl bis(2,2-dimethylpropanoate) **27****

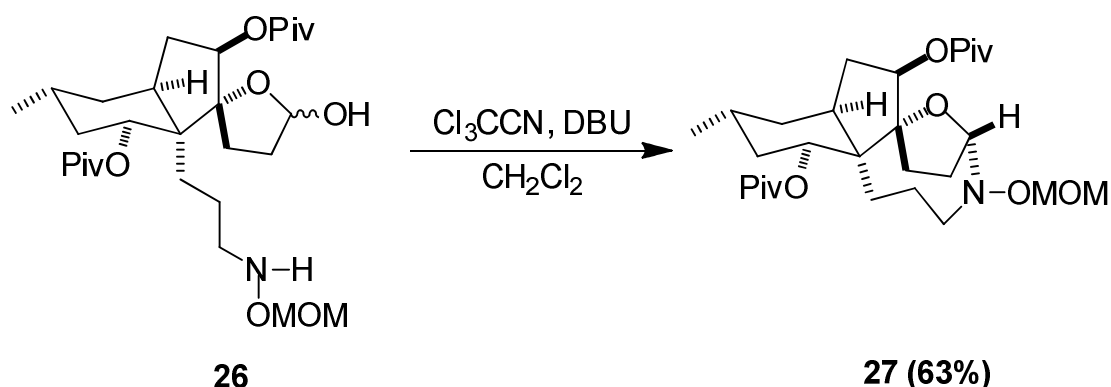

1,8-Diazabicyclo[5.4.0]undec-7-ene DBU (550  $\mu\text{L}$ , 1.32 mmol, 2.4 M in  $\text{CH}_2\text{Cl}_2$ ) was added dropwise to a solution of aminolactol **26** (32.0 mg, 0.06 mmol) in  $\text{CH}_2\text{Cl}_2$  (4.0 mL) at 0  $^\circ\text{C}$  under argon. Trichloroacetonitrile (660  $\mu\text{L}$ , 3.3 mmol, 5.0 M in  $\text{CH}_2\text{Cl}_2$ ) was added dropwise to the reaction mixture at the same temperature. After stirring at 0  $^\circ\text{C}$  for 2 h, the reaction mixture was gradually warmed to room temperature and stirred for 36 h. The color changed from pale yellow to dark brown during the course of the reaction. The dark brown solution was concentrated under reduced pressure and the residue was purified by flash chromatography using (hexanes/acetone, 40:3) as an eluent to afford tetracyclic derivative **27** as a colorless film: (19.4 mg, 63% yield).  $[\alpha]_D^{24} = +85.5$  ( $c$  0.33,  $\text{CHCl}_3$ );  $^1\text{H}$  NMR (600 MHz,  $\text{CDCl}_3$ );  $\delta$  5.19 (dd,  $J = 11.5$ , 4.6, 1H), 5.09 (t,  $J = 5.7$ , 1H), 4.90 (dd,  $J = 8.9$ , 3.6, 1H), 4.75 (s, 2H), 3.42 (s, 3H), 3.34-3.31 (m, 1H), 3.14-3.12 (m, 1H), 2.73-2.68 (m, 1H), 2.47-2.41 (m, 1H), 2.37-2.33 (m, 1H), 2.21-2.16 (m, 1H), 2.01-1.96 (m, 4H), 1.77-1.70 (m, 3H), 1.55-1.52 (m, 1H), 1.48-1.43 (m, 2H), 1.21 (s, 9H), 1.20 (s, 9H), 1.16-1.15 (m, 2H), 0.89 (d,  $J = 6.2$ , 3H);  $^{13}\text{C}$  NMR (151 MHz,  $\text{CDCl}_3$ );  $\delta$  177.8, 177.0, 98.8, 96.5, 95.6, 80.5, 72.1, 56.1, 54.2, 49.5, 38.9, 38.6, 38.4, 35.2, 34.2, 31.3, 29.0, 27.1, 26.9, 26.5, 25.2, 25.0, 21.9, 19.3; IR (thin film,  $\text{cm}^{-1}$ ) 2956, 1723, 1153; DART HRMS  $m/z$   $[\text{M}+\text{H}]^+$  calcd for  $\text{C}_{28}\text{H}_{48}\text{NO}_7$  510.3431, found 510.3432.

**(+)-Sieboldine A (1)**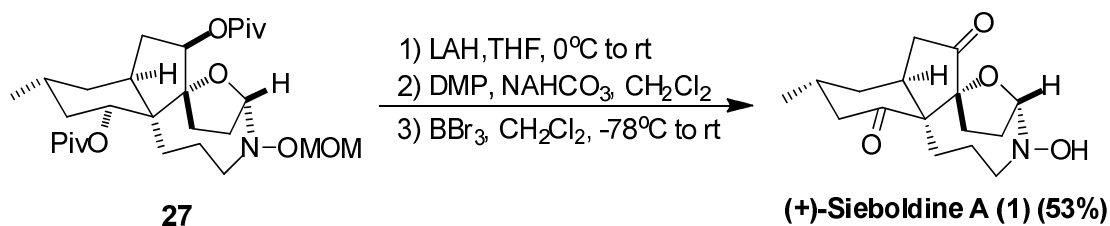

Lithium aluminium hydride LAH (57 mg, 1.5 mmol) was added to a solution of **27** (11 mg, 0.021 mmol) in THF (3 mL) at 0 °C under argon. After stirring for 2 h at the same temperature, the reaction mixture was gradually warmed to room temperature and stirred for 18 h. The reaction was diluted with EtOAc at 0 °C and a saturated aq solution of Rochelle's salt was added. The mixture was allowed to warm to room temperature and stirred for 2h. The layers were separated and the aqueous layer was extracted three times with EtOAc. The combined organic layers were washed with H<sub>2</sub>O and brine, dried over anhydrous Na<sub>2</sub>SO<sub>4</sub>, filtered and concentrated under reduced pressure.

The residue was dissolved in CH<sub>2</sub>Cl<sub>2</sub> (3 mL). NaHCO<sub>3</sub> (13 mg, 0.15 mmol) and Dess martin periodinane DMP (0.5 mL, 0.15 mmol, 0.3 M in CH<sub>2</sub>Cl<sub>2</sub>) were added to the reaction mixture at room temperature under argon. After stirring for 2 h, the reaction was quenched with saturated aq NaHCO<sub>3</sub>. The layers were separated and the aqueous layer was extracted three times with CH<sub>2</sub>Cl<sub>2</sub>. The combined organic layers were washed with H<sub>2</sub>O and brine, dried over anhydrous Na<sub>2</sub>SO<sub>4</sub>, filtered and concentrated under reduced pressure.

The residue was dissolved in CH<sub>2</sub>Cl<sub>2</sub> (3 mL) and cooled to -78 °C under argon. Boron tribromide BBr<sub>3</sub> (105 µL, 0.105 mmol, 1.0 M in CH<sub>2</sub>Cl<sub>2</sub>) was added dropwise to the reaction mixture at the same temperature. The reaction mixture was gradually warmed to 0 °C and stirred for 2 h and was then warmed to room temperature and stirred for 18h. The reaction was quenched with saturated aq NaHCO<sub>3</sub>. The layers were separated and the aqueous layer was extracted three times with CH<sub>2</sub>Cl<sub>2</sub>. The combined organic layers were washed with H<sub>2</sub>O and brine, dried over anhydrous Na<sub>2</sub>SO<sub>4</sub>, filtered and concentrated under reduced pressure. The residue was purified by flash chromatography using (hexanes/acetone, 1:1) as an eluent to afford (+)-sieboldine A (**1**) as a colorless powder (3.3 mg, 53% yield):  $[\alpha]_D^{25} = +140.0$  (*c* 0.33, CH<sub>3</sub>OH); <sup>1</sup>H NMR (600 MHz, CD<sub>3</sub>OD); δ; 4.89-4.87 (m, 1H), 3.27-3.22 (m, 1H),

3.20-3.18 (m, 1H), 2.90 (ddd,  $J = 14.8, 7.4, 3.7$ , 1H), 2.57-2.55 (m, 1H), 2.51 (dd,  $J = 12.9, 12.5$ , 1H), 2.47-2.45 (m, 1H), 2.43 (dd,  $J = 21.3, 10.7$ , 1H), 2.40-2.38 (m, 1H), 2.11-2.10 (m, 1H), 2.08-2.07 (m, 1H), 2.05-2.04 (m, 1H), 2.03-2.01 (m, 1H), 1.98-1.96 (m, 1H), 1.92 (dd,  $J = 19.6, 10.7$ , 1H), 1.79-1.77 (m, 2H), 1.76-1.75 (m, 1H), 1.62-1.60 (m, 1H), 1.05 (d,  $J = 6.2$ , 3H);  $^{13}\text{C}$  NMR (151 MHz,  $\text{CD}_3\text{OD}$ );  $\delta$  216.5, 212.7, 98.5, 92.8, 62.3, 54.5, 47.6, 38.7, 37.2, 32.5, 31.8, 31.4, 28.3, 26.1, 22.5, 19.4; IR (thin film,  $\text{cm}^{-1}$ ) 3400, 1754, 1698; DART HRMS  $m/z$   $[\text{M}+\text{H}]^+$  calcd for  $\text{C}_{16}\text{H}_{24}\text{NO}_4$  294.1705, found 294.1701.

# Optimization of asymmetric allylation of aldehyde **9** (Table S1):

**Table S1.** Asymmetric allylation of aldehyde **9**

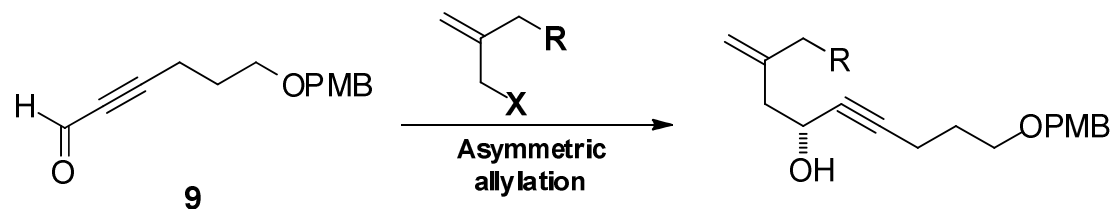

| Entry | R                   | X                 | Reagent                                                                     | Solvent                         | Temp (°C) | Yield (%) | ee <sup>a)</sup> (%) |
|-------|---------------------|-------------------|-----------------------------------------------------------------------------|---------------------------------|-----------|-----------|----------------------|
| 1     | -CH=CH <sub>2</sub> | I                 | In <sup>0</sup> , (+)-Ipc <sub>2</sub> BCl                                  | THF                             | -78 to rt | 7         | 75                   |
| 2     | -CH=CH <sub>2</sub> | I                 | In <sup>0</sup> , (+)-Ipc <sub>2</sub> BCl                                  | THF                             | -98 to rt | 35        | 77                   |
| 3     | -OTBDPS             | I                 | In <sup>0</sup> , (+)-Ipc <sub>2</sub> BCl                                  | THF                             | -78 to rt | 15        | 75                   |
| 4     | -OTBDPS             | SnBu <sub>3</sub> | TiCl <sub>4</sub> , Ti(O <i>i</i> -Pr) <sub>4</sub> ,<br>( <i>R</i> )-BINOL | CH <sub>2</sub> Cl <sub>2</sub> | -15 to rt | 80        | 89                   |
| 5     | -OAc                | SnBu <sub>3</sub> | TiCl <sub>4</sub> , Ti(O <i>i</i> -Pr) <sub>4</sub> ,<br>( <i>R</i> )-BINOL | CH <sub>2</sub> Cl <sub>2</sub> | -15 to rt | 80        | 93                   |

a) ee was determined by HPLC analysis (Daicel CHIRALPAK<sup>®</sup> OD-H)

# Determination of the absolute configuration of (*R*)-10 (Scheme S1):

Scheme S1.

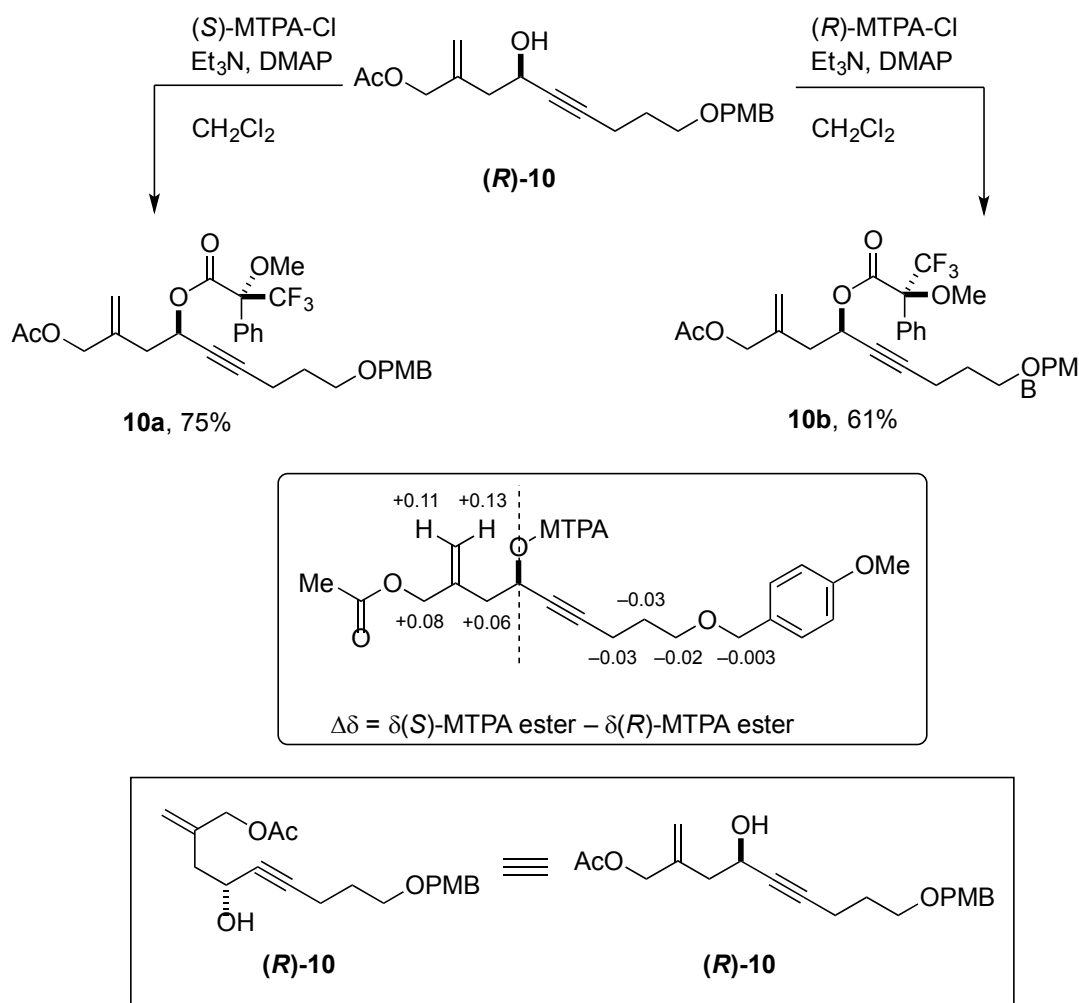

## (*R*)-MTPA ester of (*R*)-10 (10a)

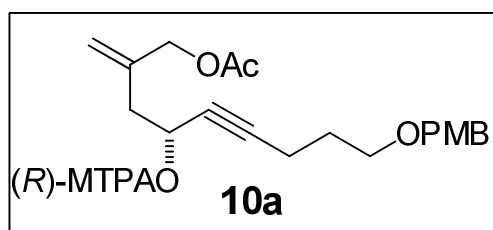

To a solution of (*R*)-10 (14 mg, 0.040 mmol) in CH<sub>2</sub>Cl<sub>2</sub> (0.40 mL) were added Et<sub>3</sub>N (50  $\mu$ L, 0.36 mmol), DMAP (1.0 mg,  $8.0 \times 10^{-3}$  mmol) and (*S*)-MTPA-Cl (15 mg,  $6.0 \times 10^{-2}$  mmol) at room temperature. After stirring

for 1.5 h at the same temperature, the reaction was quenched with saturated aq NH<sub>4</sub>Cl. The layers were separated and the aqueous layer was extracted three times with CH<sub>2</sub>Cl<sub>2</sub>. The combined organic extracts were dried over anhydrous Na<sub>2</sub>SO<sub>4</sub>, filtered and concentrated under reduced pressure. The residue was purified by flash column



chromatography using (hexanes/EtOAc, 6:1) as an eluent to afford **10a** (17 mg, 75%) as a colorless oil:  $^1\text{H}$  NMR (400 MHz,  $\text{CDCl}_3$ );  $\delta$  7.55-7.53 (m, 2H), 7.39-7.36 (m, 3H), 7.26-7.23 (m, 2H), 6.88-6.86 (m, 2H), 5.71-5.68 (m, 1H), 5.09 (s, 1H), 4.95 (s, 1H), 4.46-4.45 (m, 2H), 4.41 (s, 2H), 3.80 (s, 3H), 3.58 (s, 3H), 3.49 (t,  $J = 6.2$ , 2H), 2.58-2.49 (m, 2H), 2.33 (td,  $J = 7.1, 1.8$ , 2H), 2.07 (s, 3H), 1.81-1.74 (m, 2H).

**(S)-MTPA ester of (R)-10 (10b)**

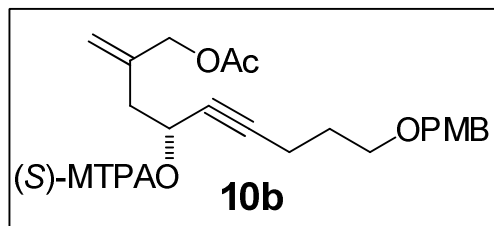

In the same manner as that described for preparation of **10a**, **(R)-10** (14 mg, 0.040 mmol) with *(R)*-MTPA-Cl (15 mg, 6.0 x 10<sup>-2</sup> mmol) afforded **10b** (14 mg, 61 %) as a colorless oil:  $^1\text{H}$  NMR (400 MHz,  $\text{CDCl}_3$ );  $\delta$

7.53-7.51 (m, 2H), 7.40-7.35 (m, 3H), 7.26-7.23 (m, 2H), 6.89-6.85 (m, 2H), 5.70-5.65 (m, 1H), 5.20 (s, 1H), 5.09 (s, 1H), 4.53 (s, 2H), 4.41 (s, 2H), 3.80 (s, 3H), 3.53 (s, 3H), 3.48 (t,  $J = 6.2$ , 2H), 2.65-2.53 (m, 2H), 2.30 (td,  $J = 7.1, 1.8$ , 2H), 2.07 (s, 3H), 1.78-1.72 (m, 2H).

**(+)-Sieboldine A  $^{13}\text{C}$  spectra comparison:**

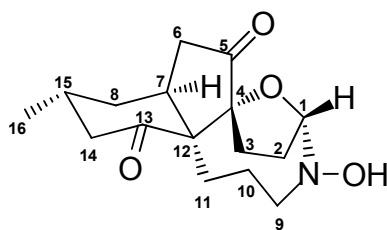

**(+)-Sieboldine A**

| <b>Position</b> | <b><math>^{13}\text{C}</math> NMR (<math>\delta</math>)<br/>Natural isolate<br/>(<math>\text{CD}_3\text{OD}</math>)</b> | <b><math>^{13}\text{C}</math> NMR (<math>\delta</math>)<br/>Synthetic sample<br/>(151 MHz, <math>\text{CD}_3\text{OD}</math>)</b> |
|-----------------|-------------------------------------------------------------------------------------------------------------------------|-----------------------------------------------------------------------------------------------------------------------------------|
| <b>1</b>        | 98.5                                                                                                                    | 98.5                                                                                                                              |
| <b>2</b>        | 31.4                                                                                                                    | 31.4                                                                                                                              |
| <b>3</b>        | 26.1                                                                                                                    | 26.1                                                                                                                              |
| <b>4</b>        | 92.8                                                                                                                    | 92.8                                                                                                                              |
| <b>5</b>        | 212.6                                                                                                                   | 212.7                                                                                                                             |
| <b>6</b>        | 37.2                                                                                                                    | 37.2                                                                                                                              |
| <b>7</b>        | 38.7                                                                                                                    | 38.7                                                                                                                              |
| <b>8</b>        | 31.8                                                                                                                    | 31.8                                                                                                                              |
| <b>9</b>        | 54.5                                                                                                                    | 54.5                                                                                                                              |
| <b>10</b>       | 19.4                                                                                                                    | 19.4                                                                                                                              |
| <b>11</b>       | 28.3                                                                                                                    | 28.3                                                                                                                              |
| <b>12</b>       | 62.3                                                                                                                    | 62.3                                                                                                                              |
| <b>13</b>       | 216.5                                                                                                                   | 216.5                                                                                                                             |
| <b>14</b>       | 47.4                                                                                                                    | 47.6                                                                                                                              |
| <b>15</b>       | 32.5                                                                                                                    | 32.5                                                                                                                              |
| <b>16</b>       | 22.5                                                                                                                    | 22.5                                                                                                                              |

**(+)-Sieboldine A  $^1\text{H}$  spectra comparison:**



**(+)-Sieboldine A**

| <b>Position</b> | <b><math>^1\text{H}</math> NMR (<math>\delta</math>)<br/>Natural isolate<br/>(<math>\text{CD}_3\text{OD}</math>)</b> | <b><math>^1\text{H}</math> NMR (<math>\delta</math>)<br/>Synthetic sample<br/>(600 MHz, <math>\text{CD}_3\text{OD}</math>)</b> |
|-----------------|----------------------------------------------------------------------------------------------------------------------|--------------------------------------------------------------------------------------------------------------------------------|
| <b>1</b>        | 4.89 (m, 1H)                                                                                                         | 4.89-4.87 (m, 1H)                                                                                                              |
| <b>2a</b>       | 1.98 (m, 1H)                                                                                                         | 1.98-1.96 (m, 1H)                                                                                                              |
| <b>2b</b>       | 2.12 (m, 1H)                                                                                                         | 2.11-2.10 (m, 1H)                                                                                                              |
| <b>3a</b>       | 2.08 (m, 1H)                                                                                                         | 2.08-2.07 (m, 1H)                                                                                                              |
| <b>3b</b>       | 2.40 (m, 1H)                                                                                                         | 2.40-2.38 (m, 1H)                                                                                                              |
| <b>6a</b>       | 1.93 (dd, $J = 19.6, 10.9$ , 1H)                                                                                     | 1.92 (dd, $J = 19.6, 10.7$ , 1H)                                                                                               |
| <b>6b</b>       | 2.45 (dd, $J = 19.6, 9.2$ , 1H)                                                                                      | 2.43 (dd, $J = 21.3, 10.7$ , 1H)                                                                                               |
| <b>7</b>        | 3.25 (m, 1H)                                                                                                         | 3.27-3.22 (m, 1H)                                                                                                              |
| <b>8a</b>       | 1.76 (m, 1H)                                                                                                         | 1.76-1.75 (m, 1H)                                                                                                              |
| <b>8b</b>       | 1.77 (m, 1H)                                                                                                         | 1.79-1.77 (m, 1H)                                                                                                              |
| <b>9a</b>       | 2.91 (ddd, $J = 14.8, 8.0, 3.7$ , 1H)                                                                                | 2.90 (ddd, $J = 14.8, 7.4, 3.7$ , 1H)                                                                                          |
| <b>9b</b>       | 3.19 (m, 1H)                                                                                                         | 3.20-3.18 (m, 1H)                                                                                                              |
| <b>10a</b>      | 1.63 (m, 1H)                                                                                                         | 1.62-1.60 (m, 1H)                                                                                                              |
| <b>10b</b>      | 2.57 (m, 1H)                                                                                                         | 2.57-2.55 (m, 1H)                                                                                                              |
| <b>11a</b>      | 1.77 (m, 1H)                                                                                                         | 1.79-1.77 (m, 1H)                                                                                                              |
| <b>11b</b>      | 2.46 (m, 1H)                                                                                                         | 2.47-2.45 (m, 1H)                                                                                                              |
| <b>14a</b>      | 2.03 (m, 1H)                                                                                                         | 2.03-2.01 (m, 1H)                                                                                                              |
| <b>14b</b>      | 2.54 (dd, $J = 12.7, 12.7$ , 1H)                                                                                     | 2.51 (dd, $J = 12.9, 12.5$ , 1H)                                                                                               |
| <b>15</b>       | 2.06 (m, 1H)                                                                                                         | 2.05-2.04 (m, 1H)                                                                                                              |
| <b>16</b>       | 1.06 (d, $J = 6.2$ , 3H)                                                                                             | 1.05 (d, $J = 6.2$ , 3H)                                                                                                       |

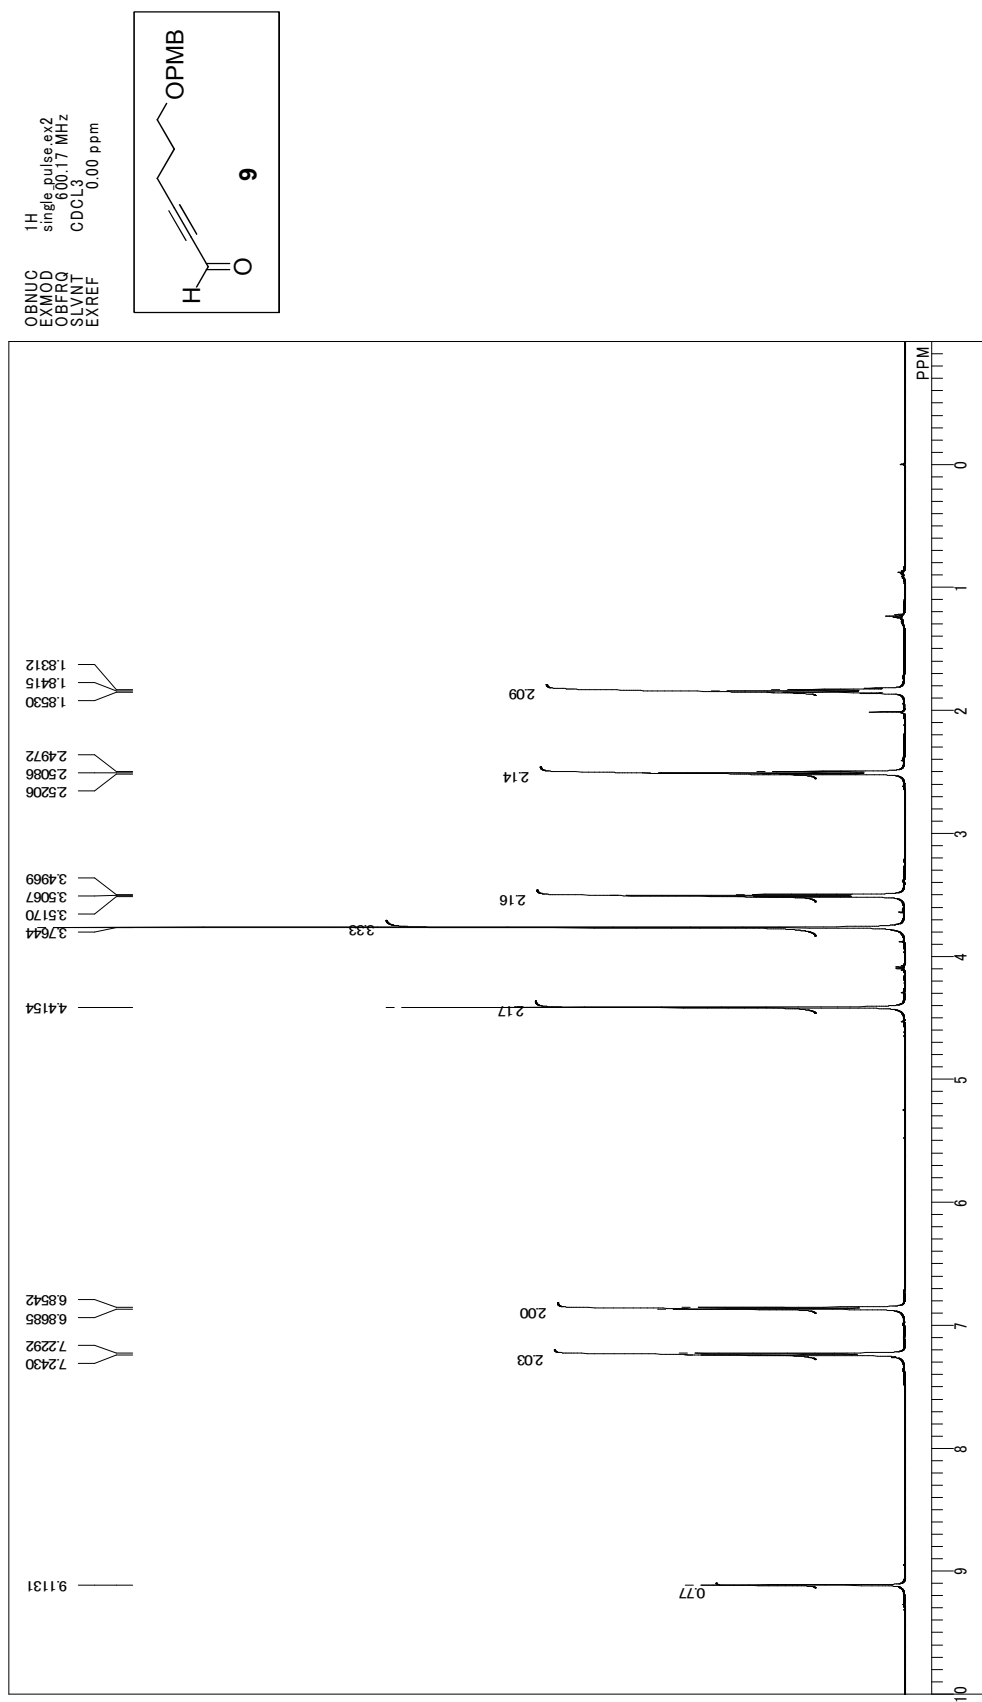

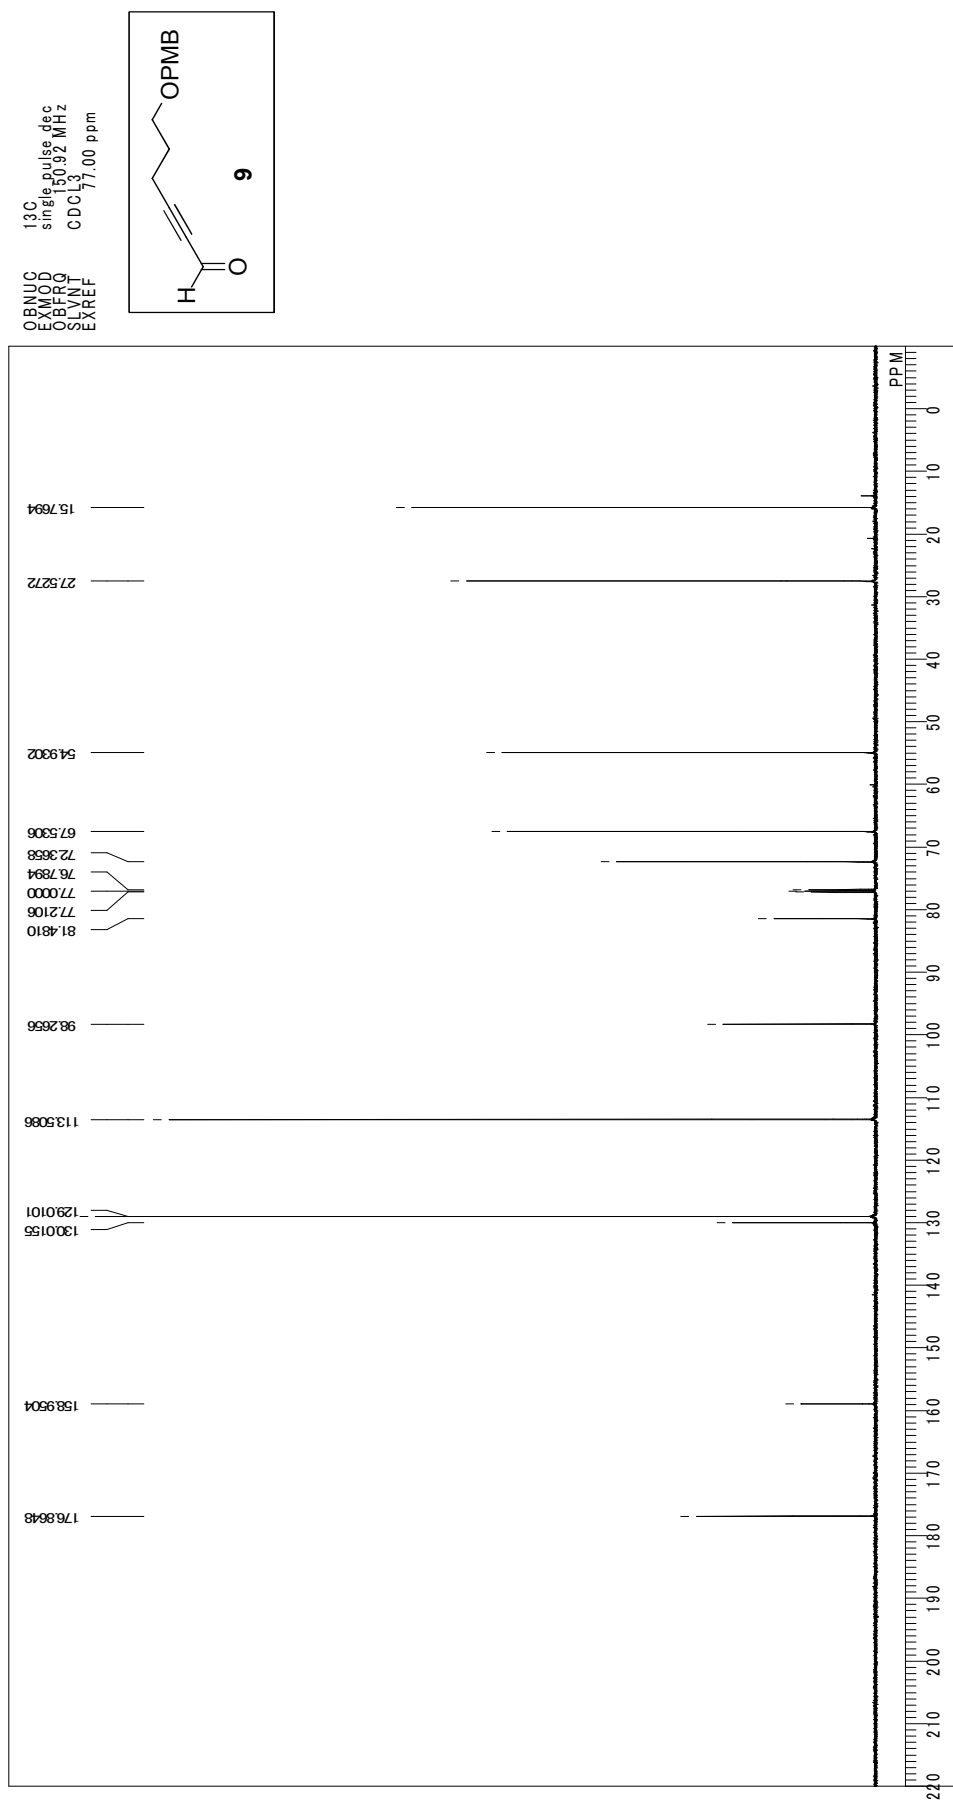

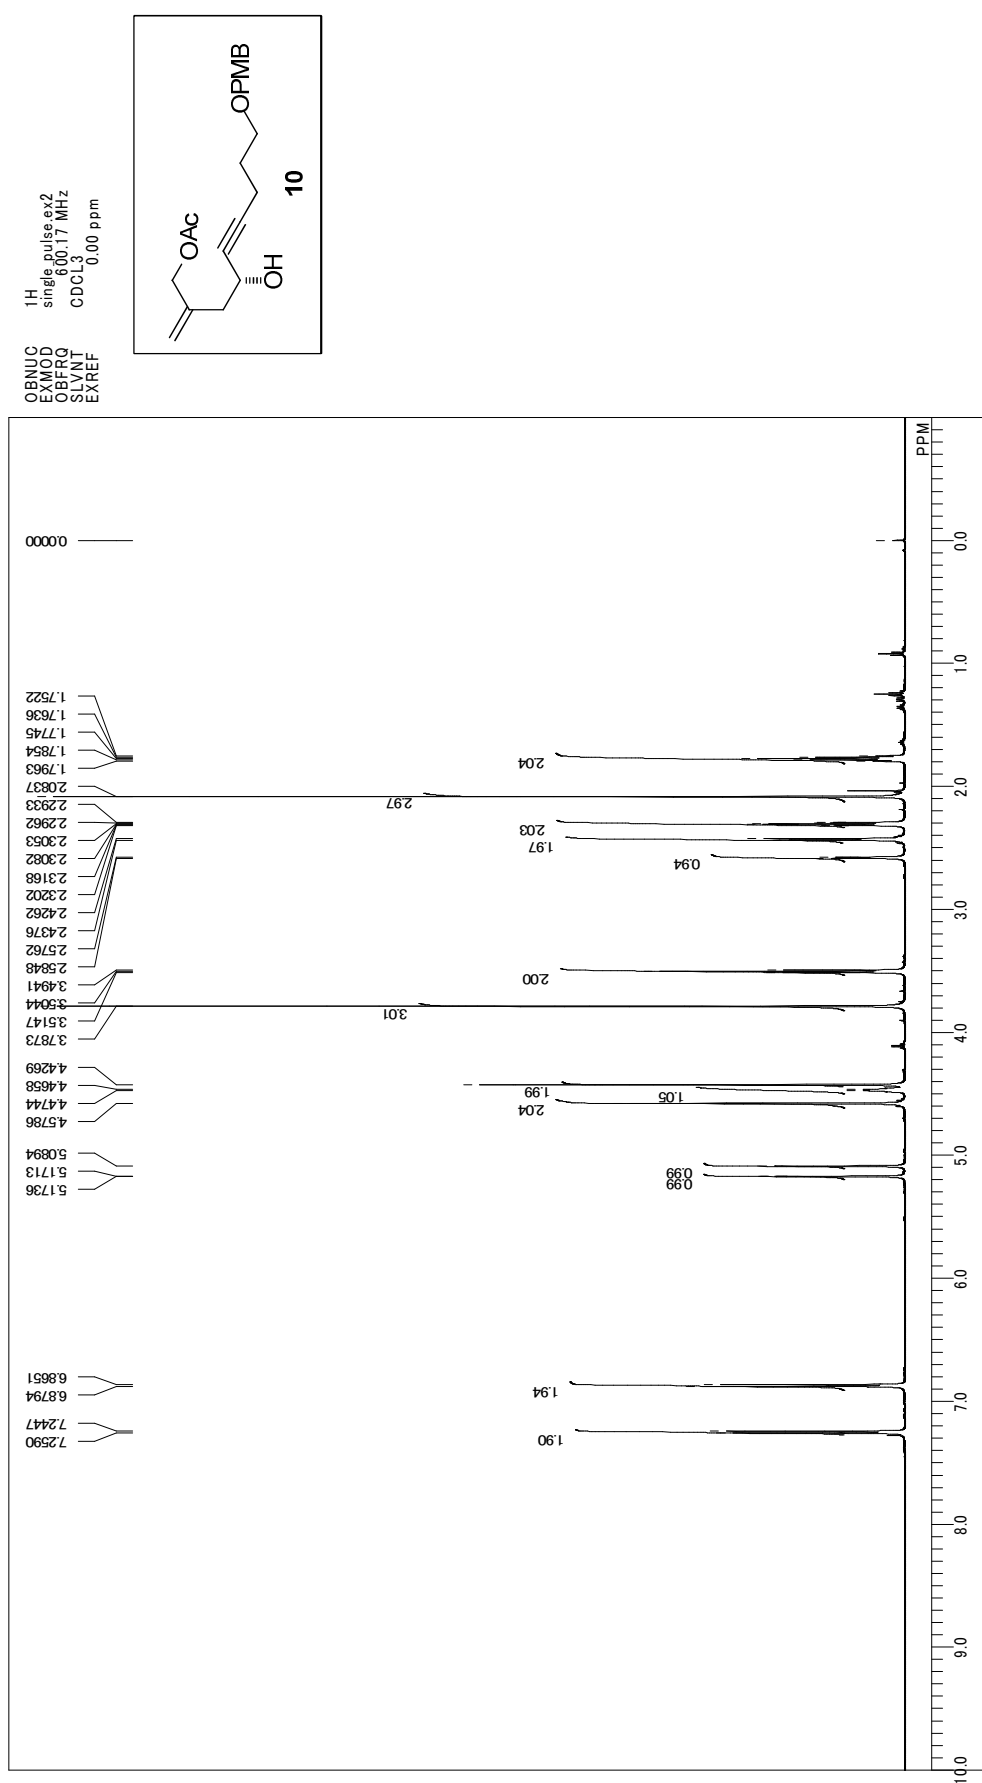

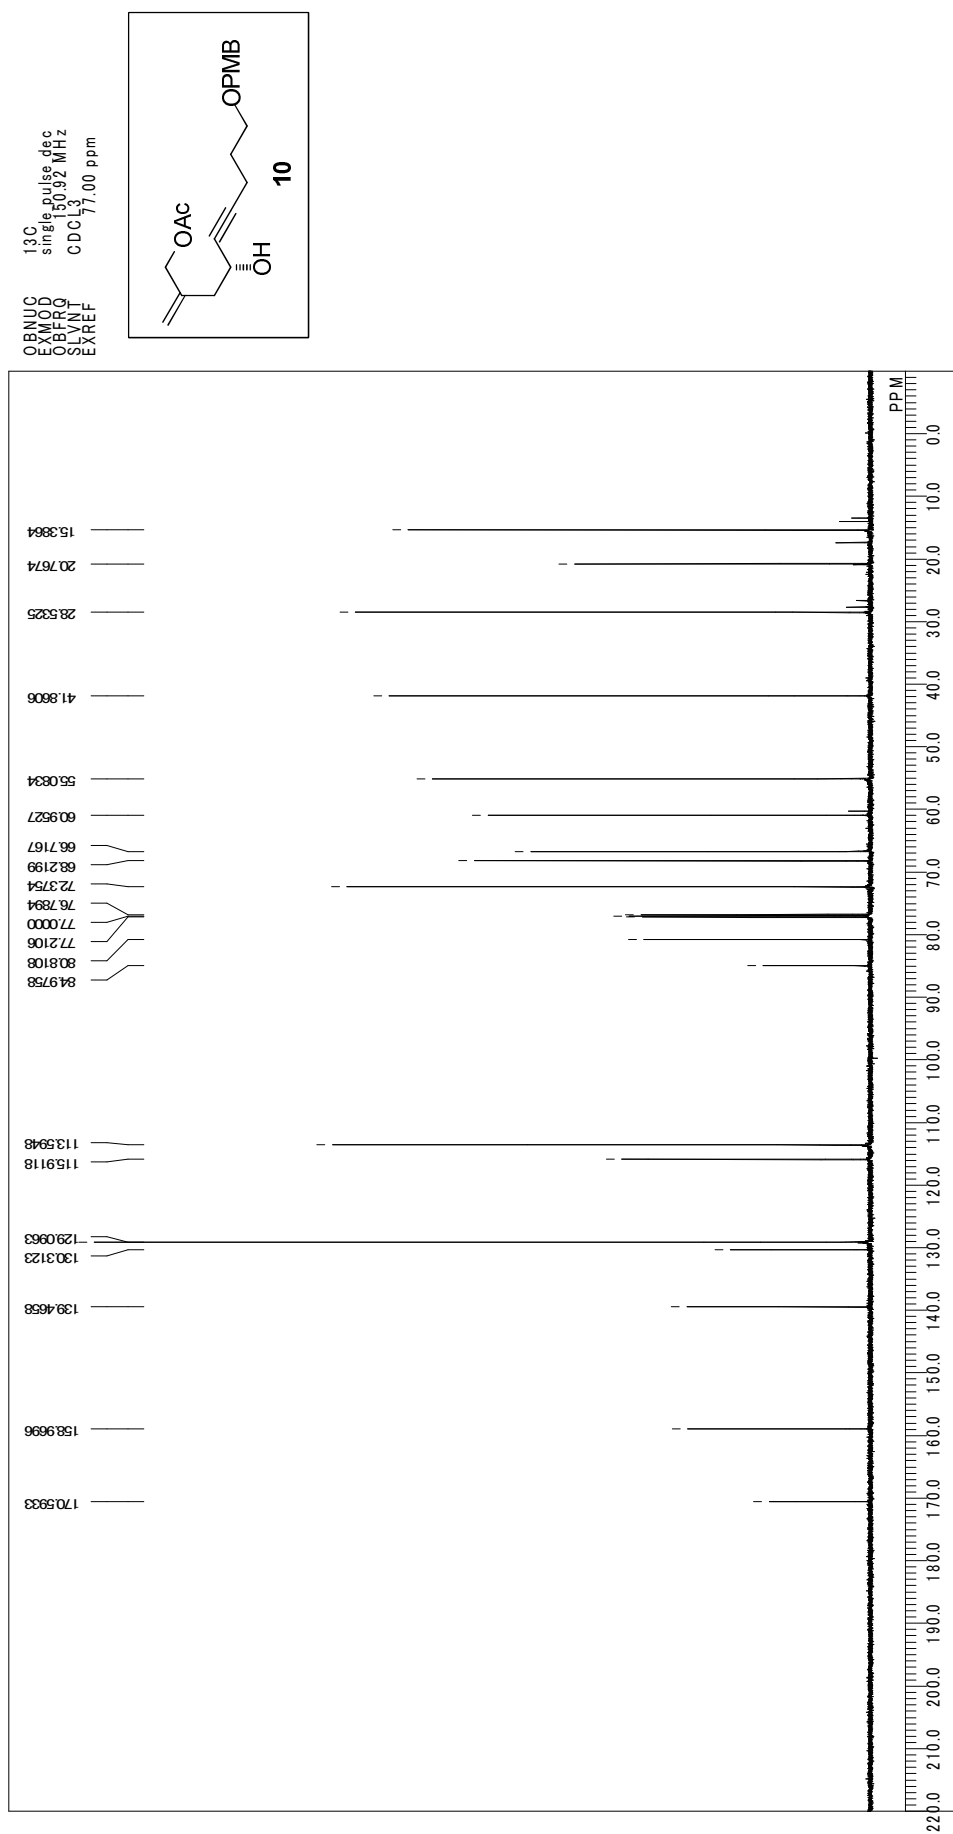

CHROMATOPAC C-R7A CH=1 REPORT No.=5

7071=1:CHRM1.C00

13/07/05 03:05:54

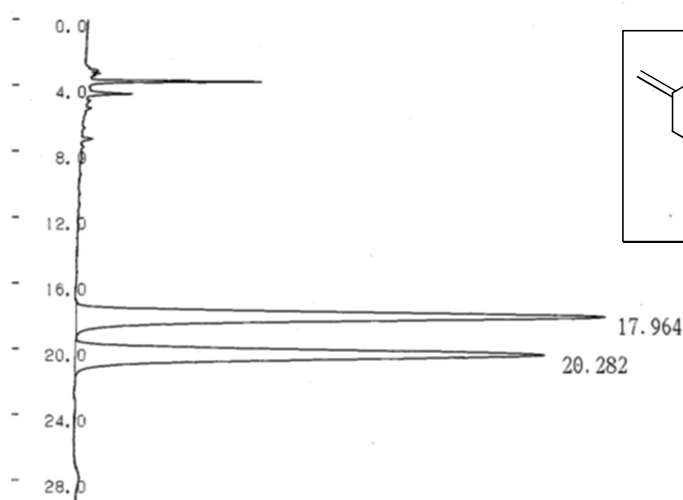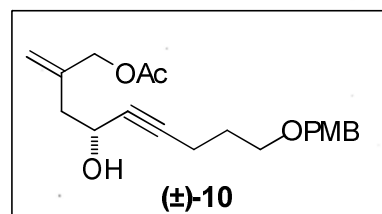

\*\* 定量計算結果 \*\*

| CH    | PKNO | TIME   | AREA   | HEIGHT | MK | IDNO | CONC    | NAME |
|-------|------|--------|--------|--------|----|------|---------|------|
| 1     | 1    | 17.964 | 204002 | 5497   |    |      | 50.2319 |      |
|       | 2    | 20.282 | 202119 | 4875   |    |      | 49.7681 |      |
| TOTAL |      |        | 406121 | 10372  |    |      | 100     |      |

CHROMATOPAC C-R7A CH=1 REPORT No.=7

7071=1:CHRM1.C00

13/07/05 04:13:56

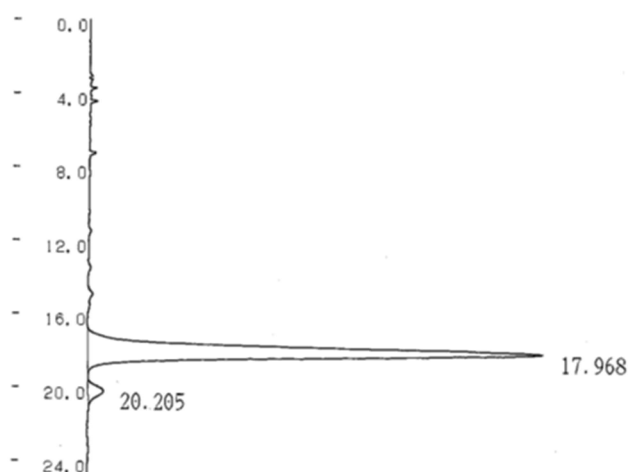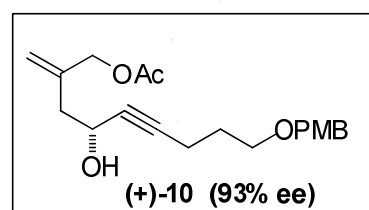

\*\* 定量計算結果 \*\*

| CH    | PKNO | TIME   | AREA   | HEIGHT | MK | IDNO | CONC    | NAME |
|-------|------|--------|--------|--------|----|------|---------|------|
| 1     | 1    | 17.968 | 370236 | 9462   |    |      | 96.5107 |      |
|       | 2    | 20.205 | 13386  | 329    |    |      | 3.4893  |      |
| TOTAL |      |        | 383622 | 9791   |    |      | 100     |      |



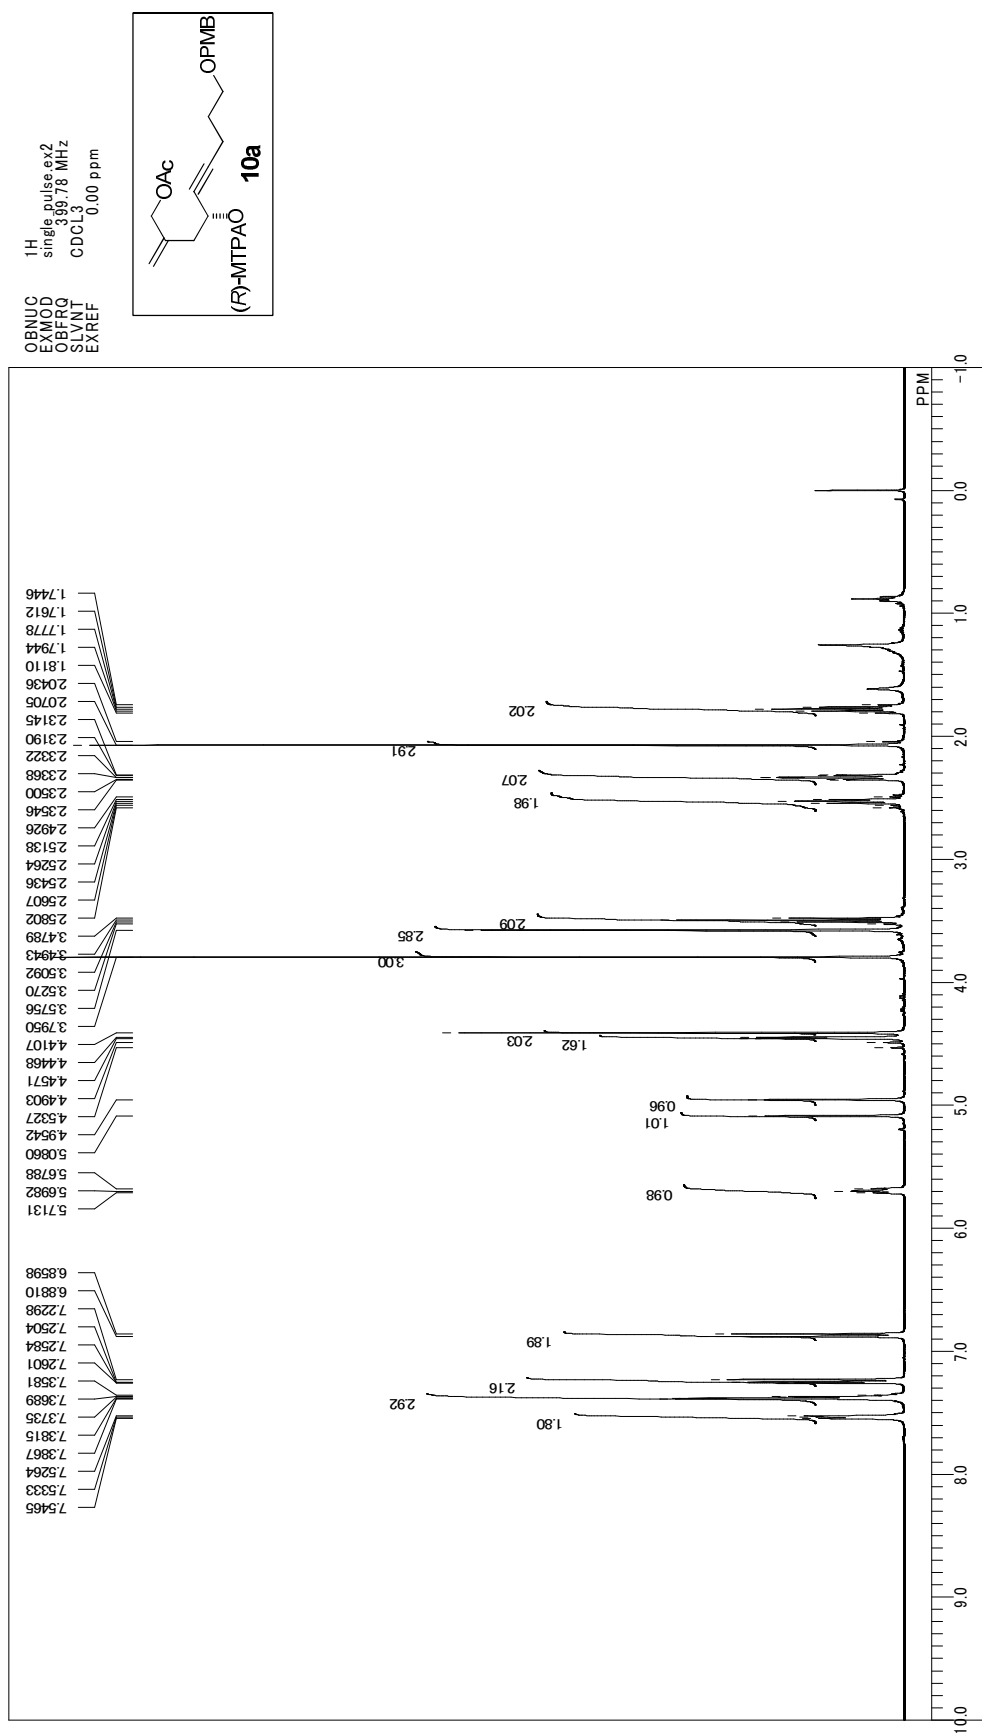

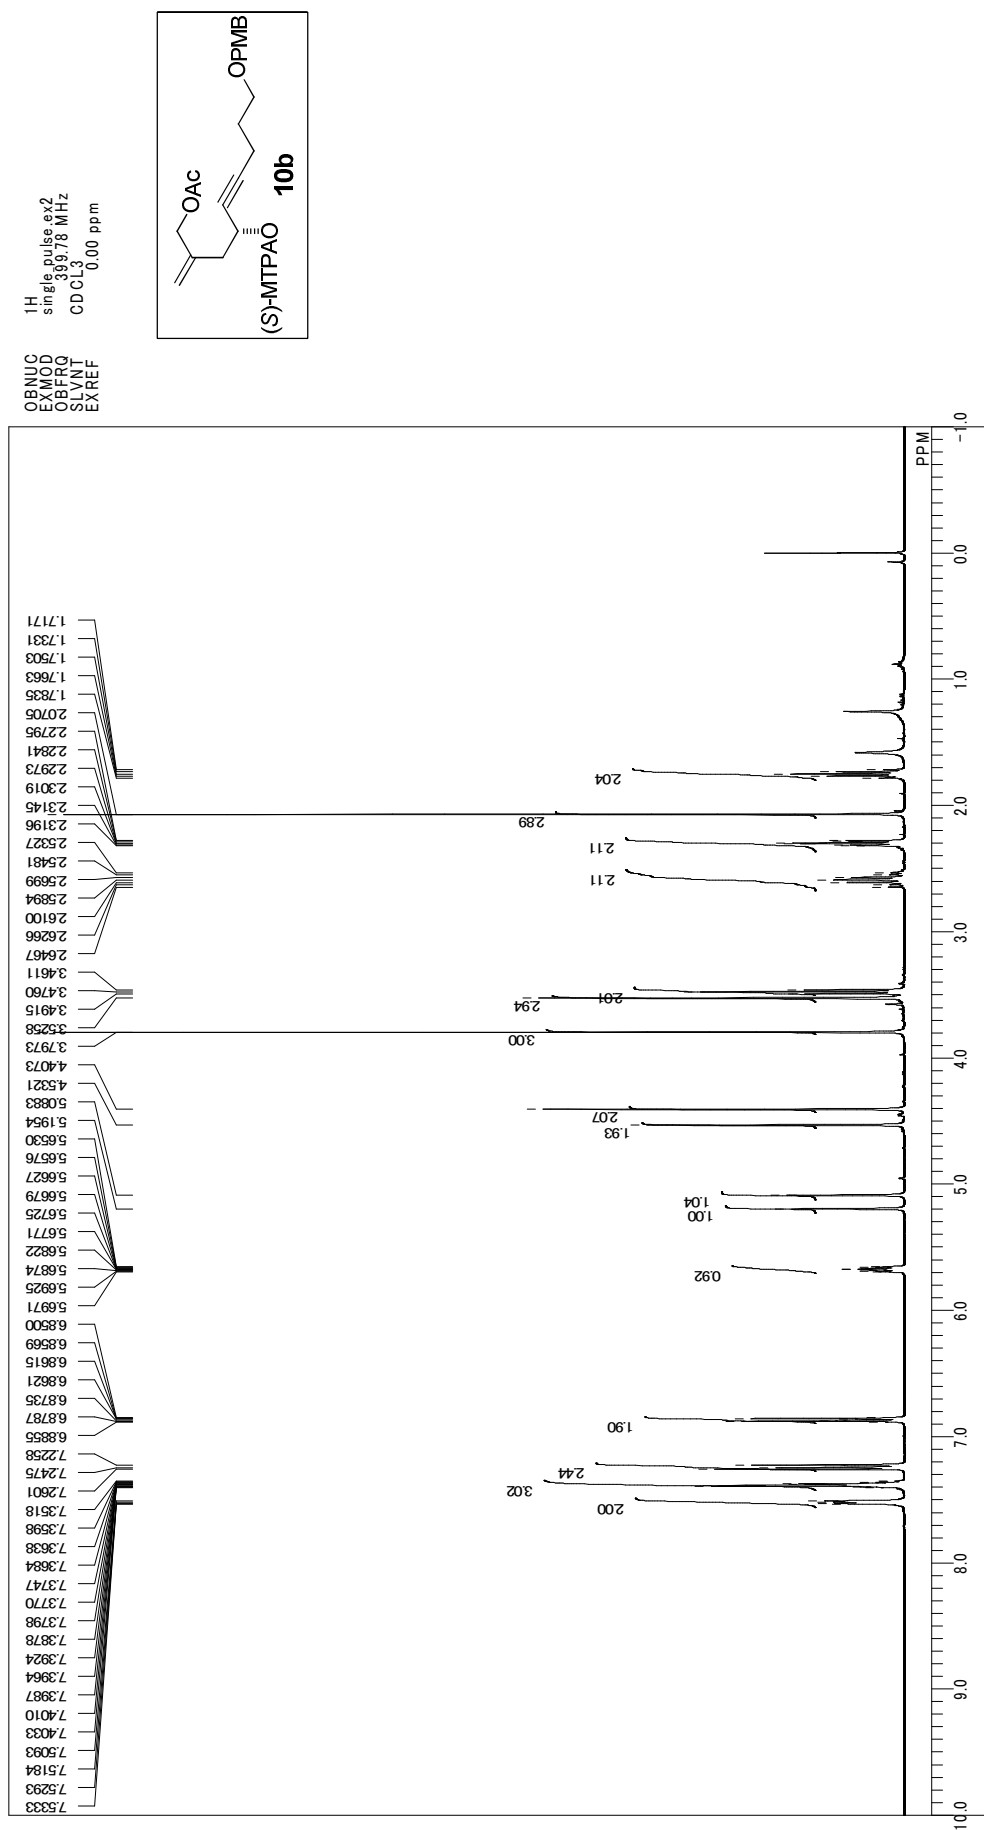

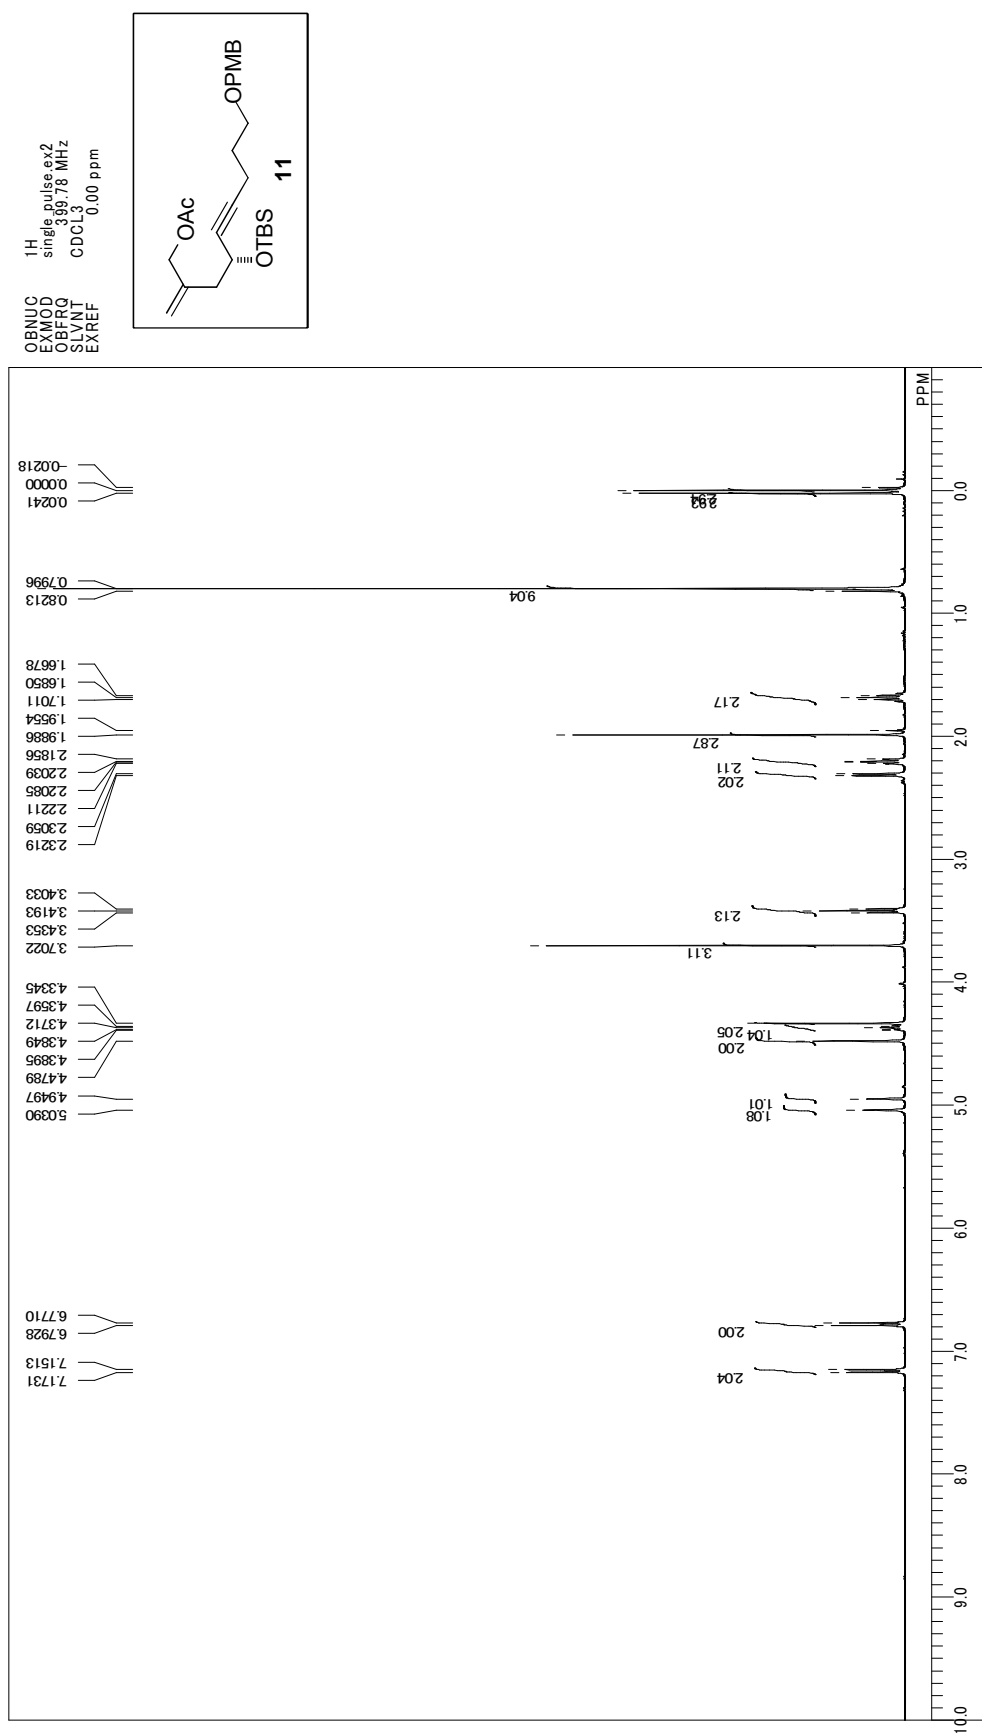

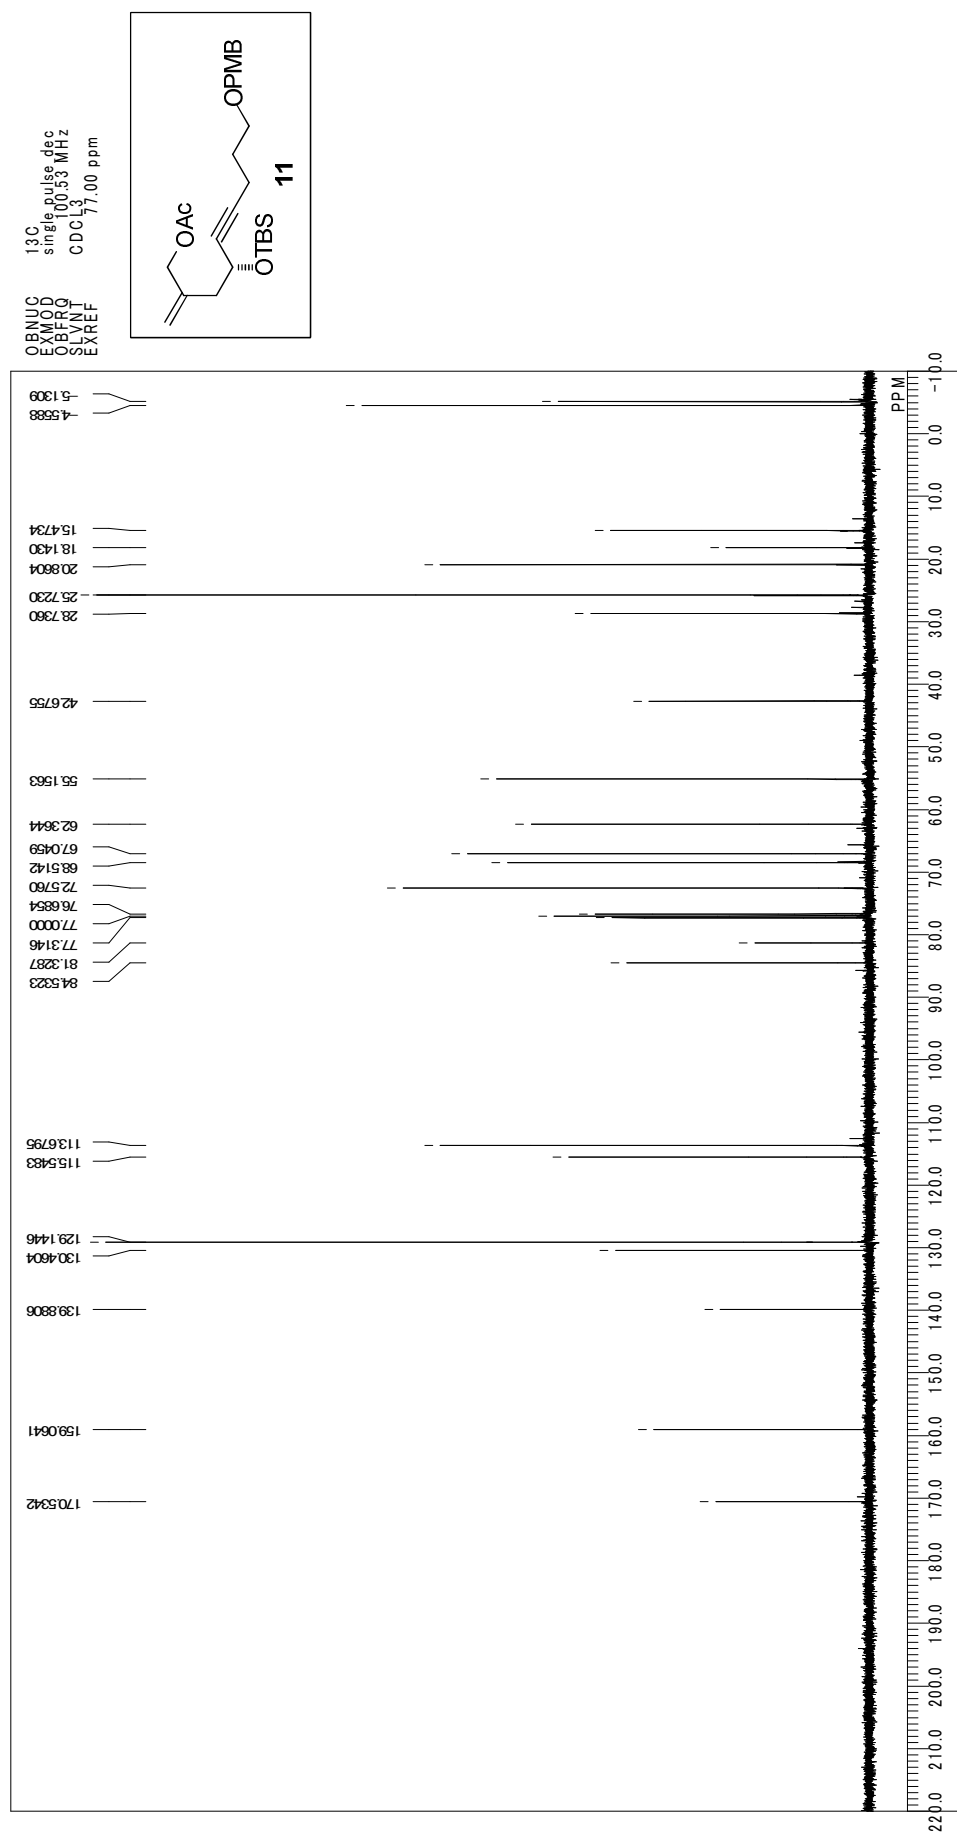

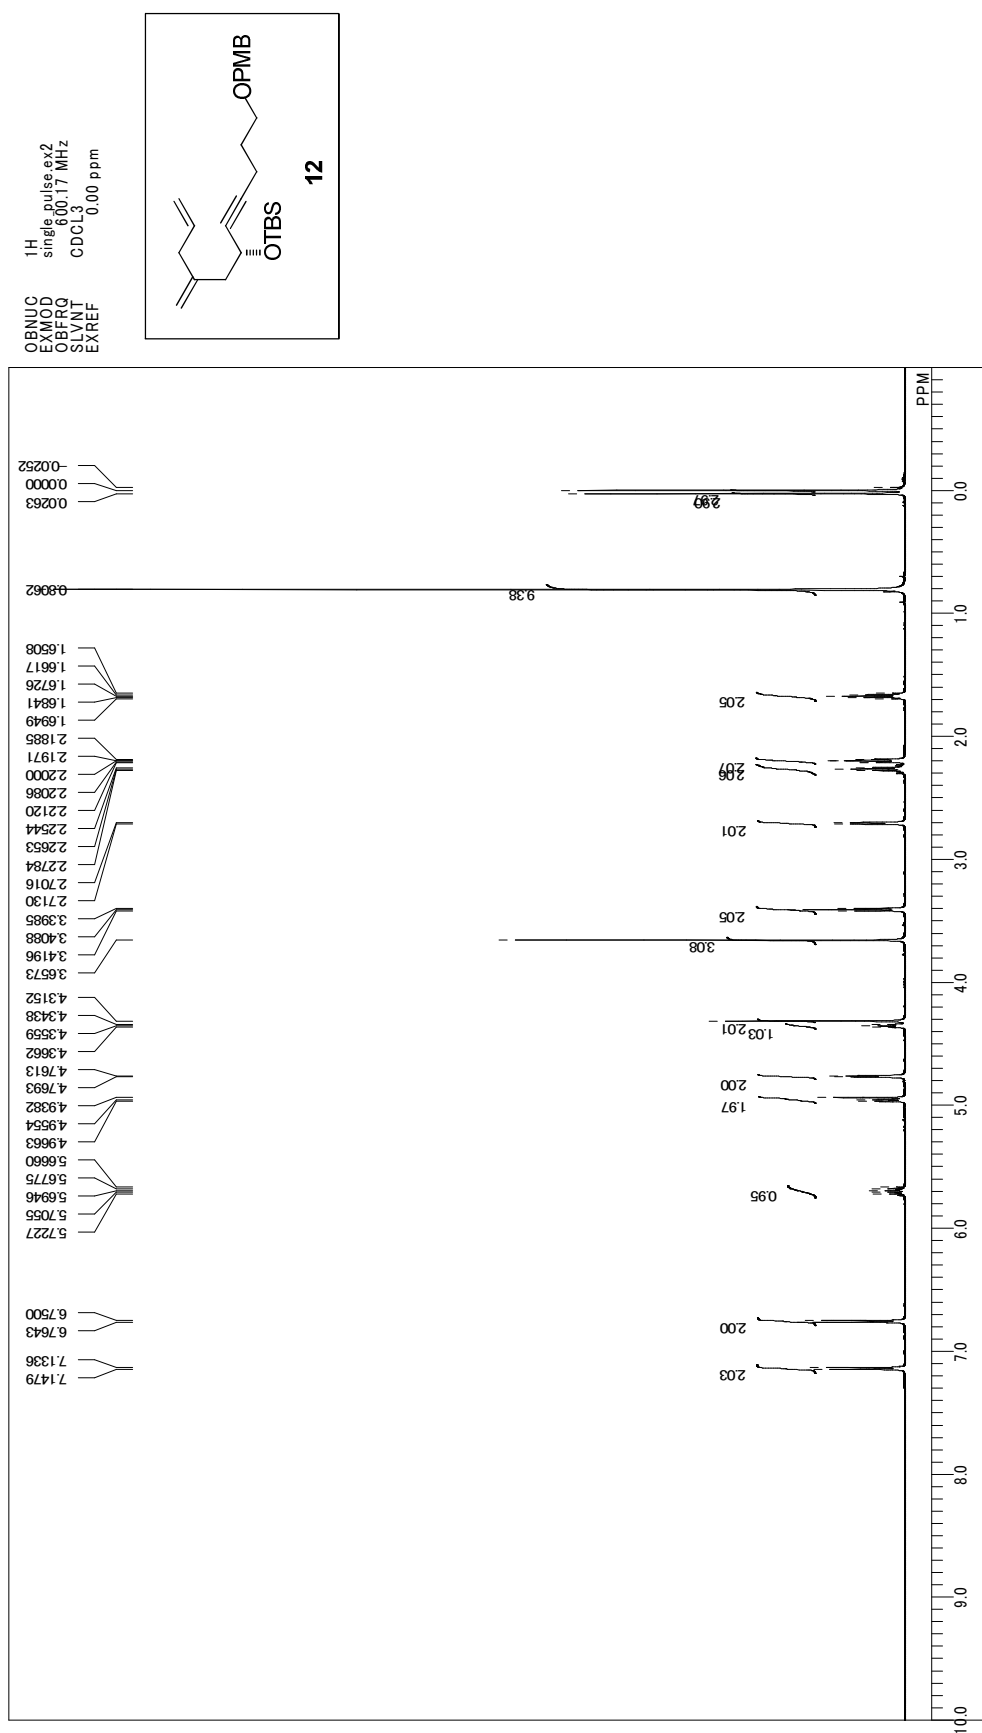

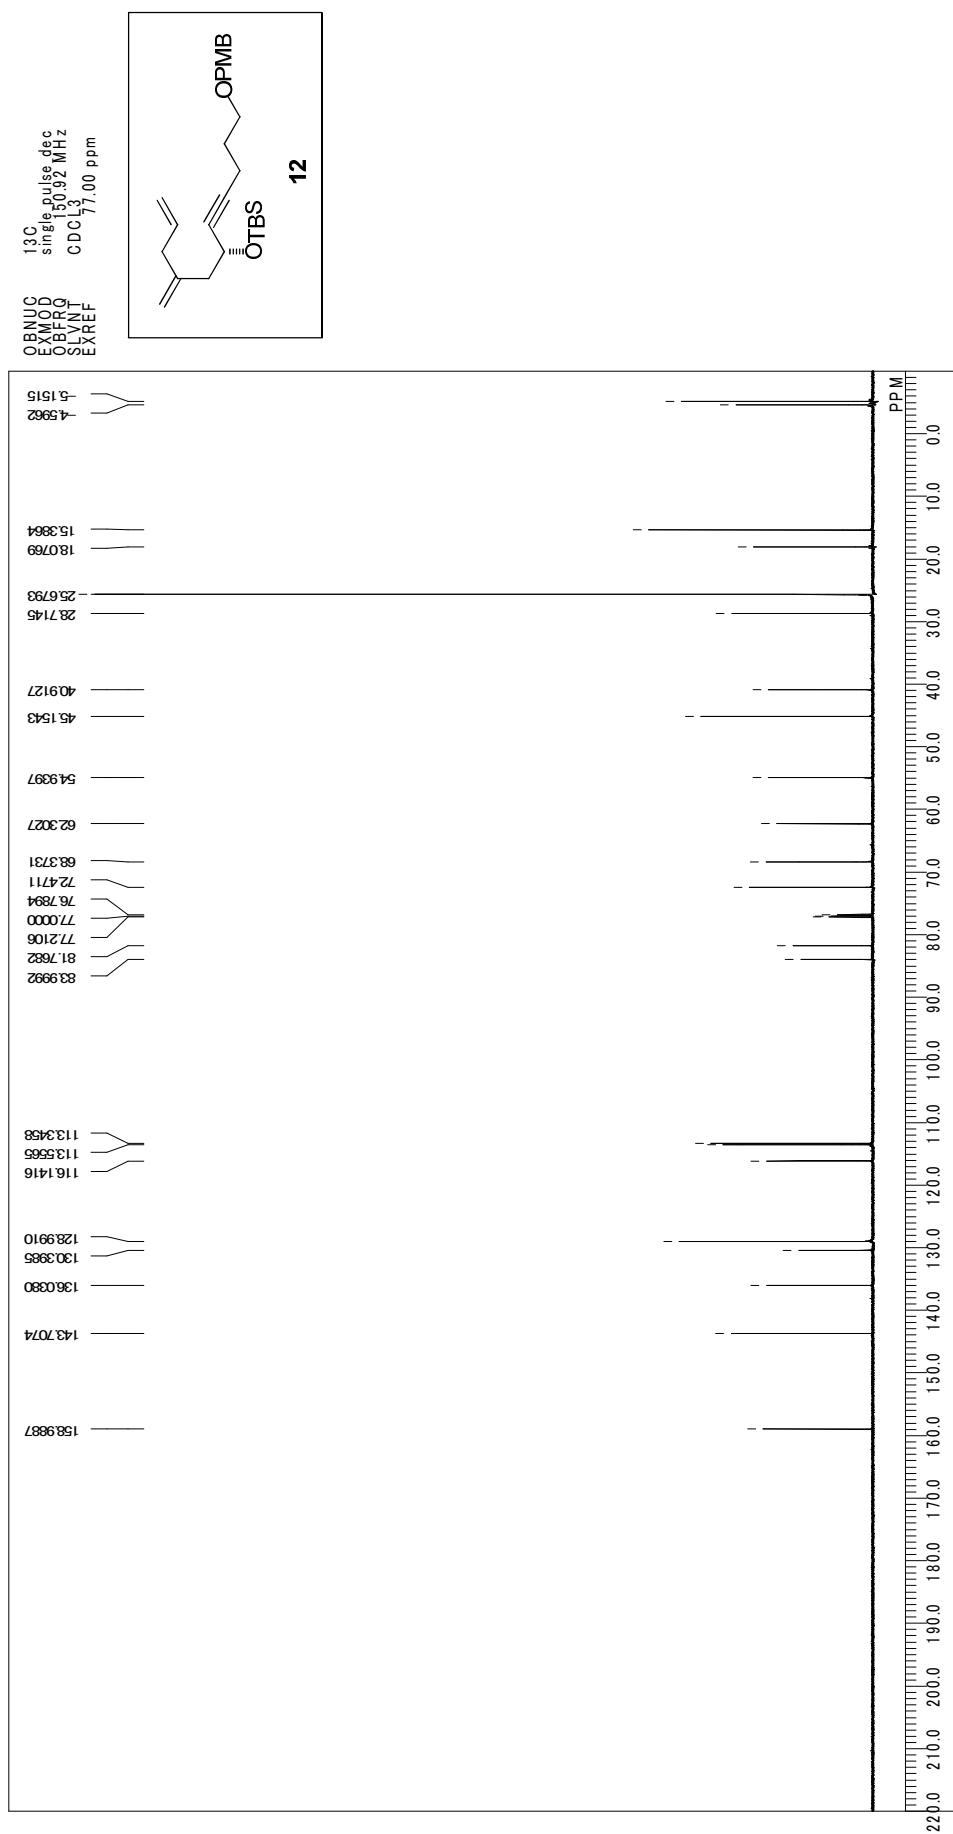

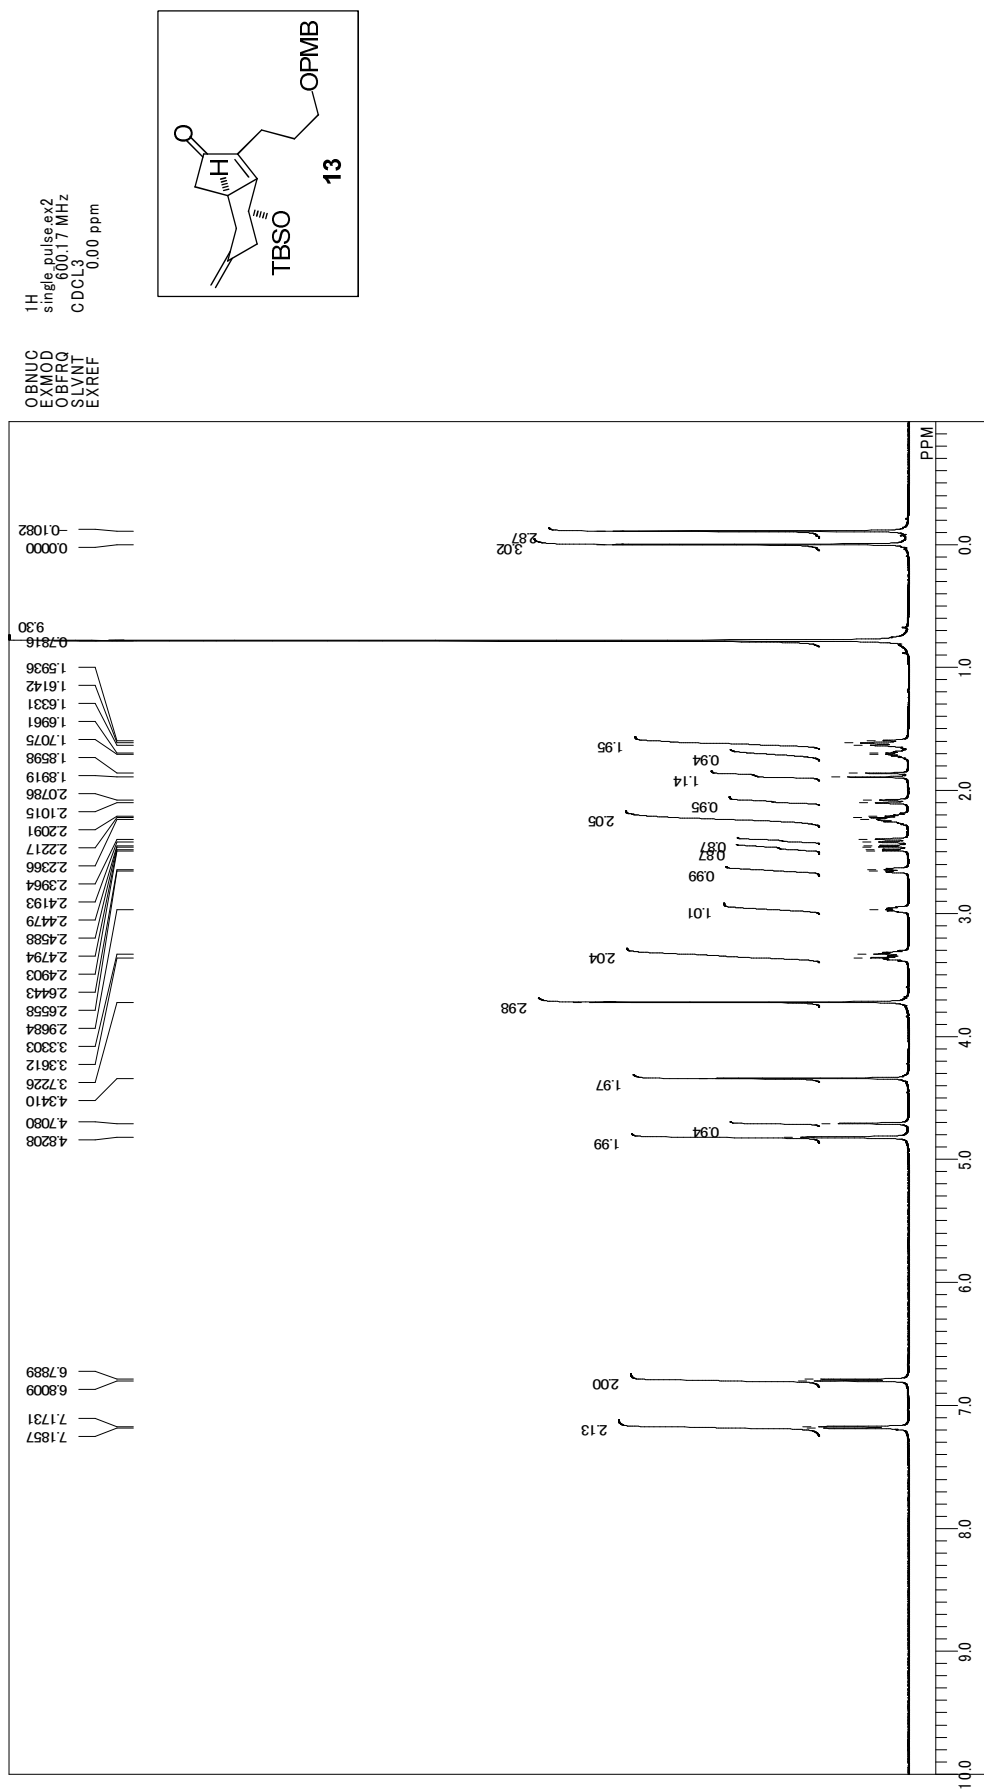

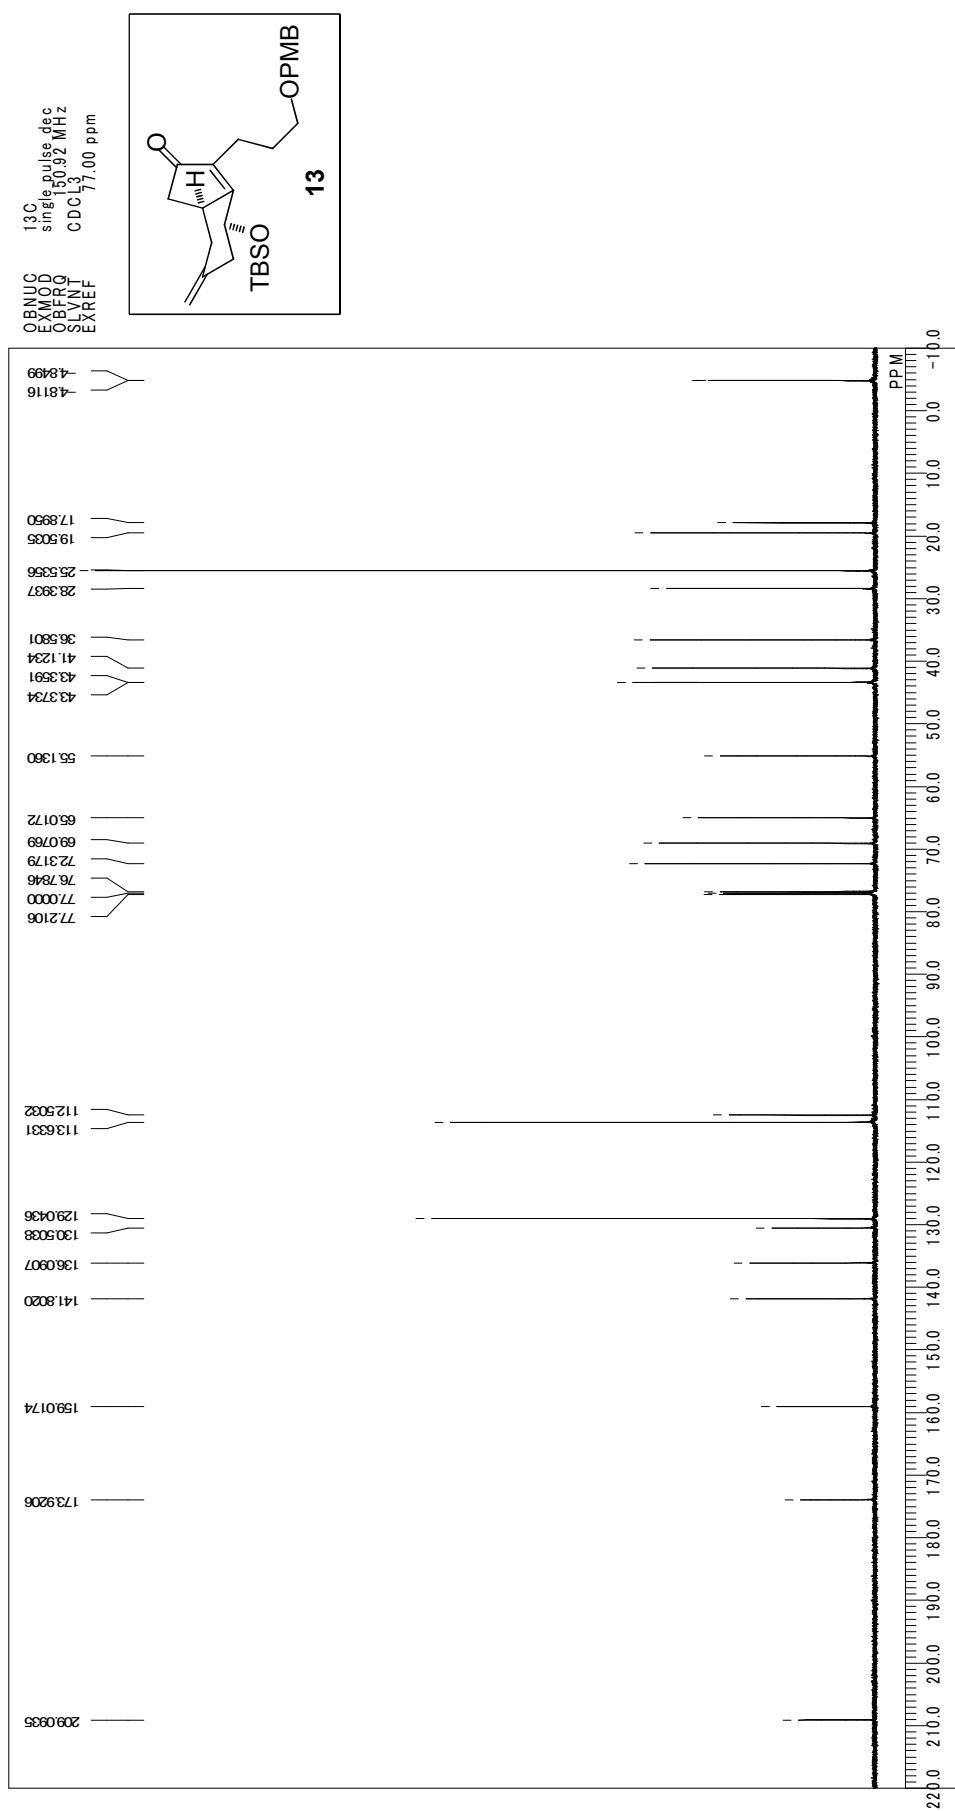



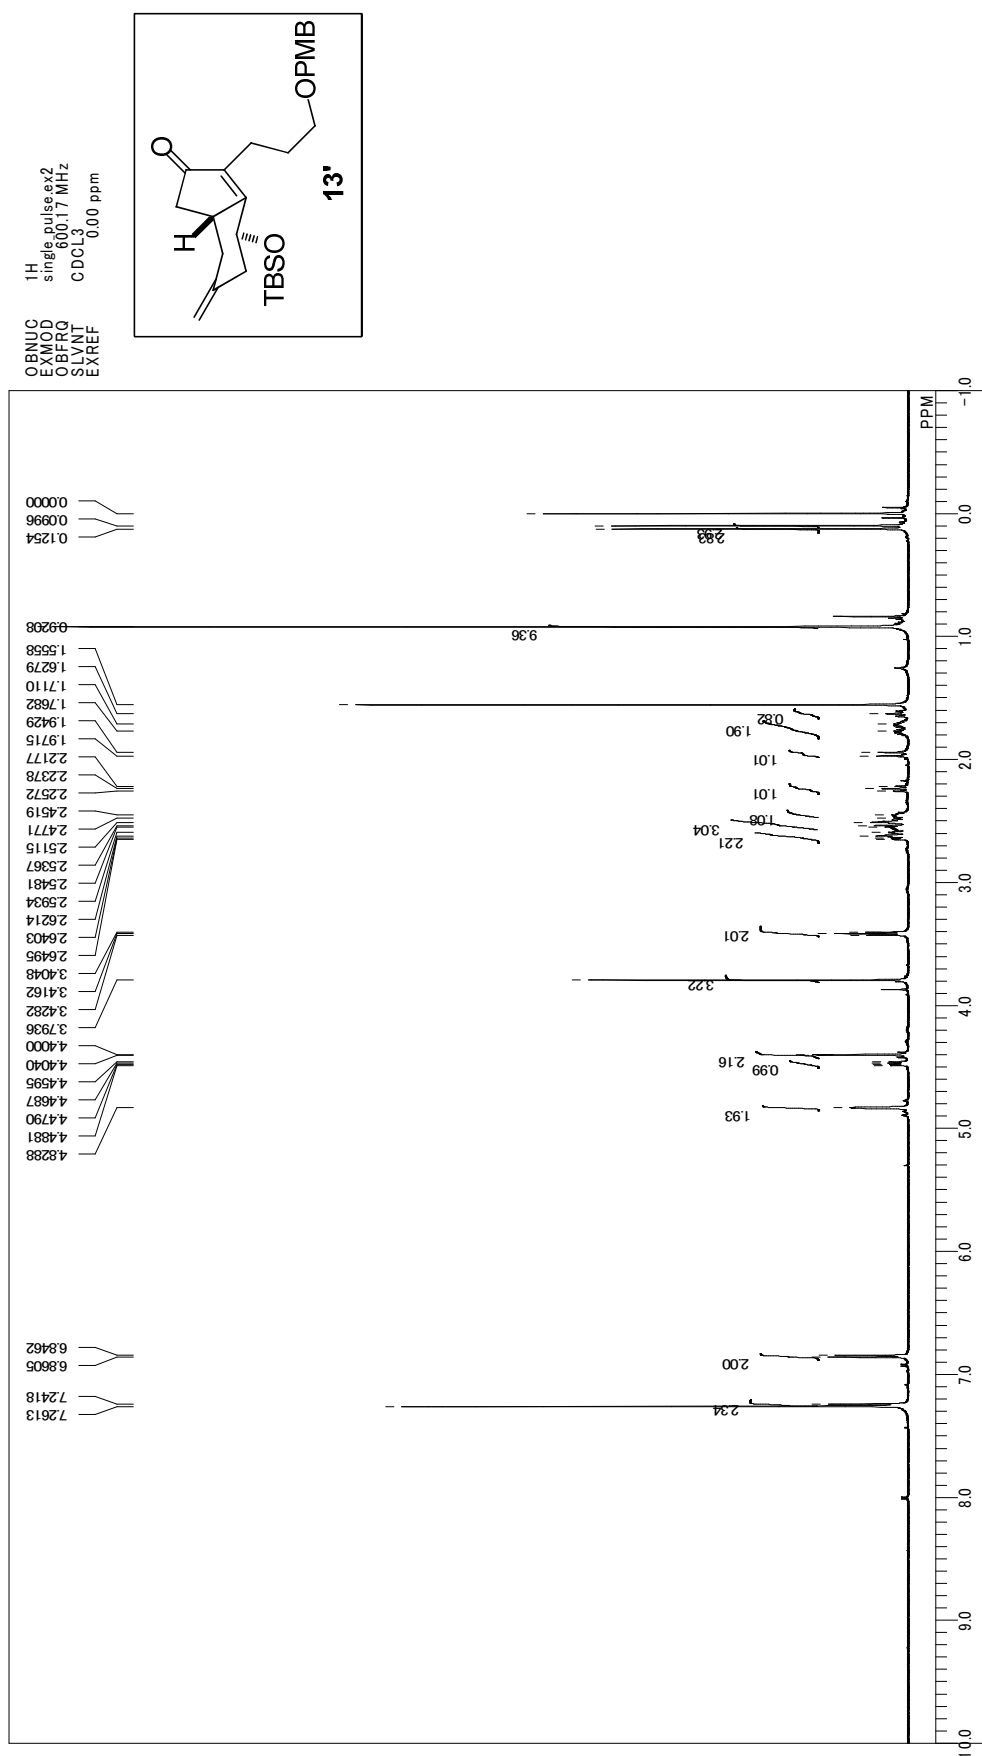



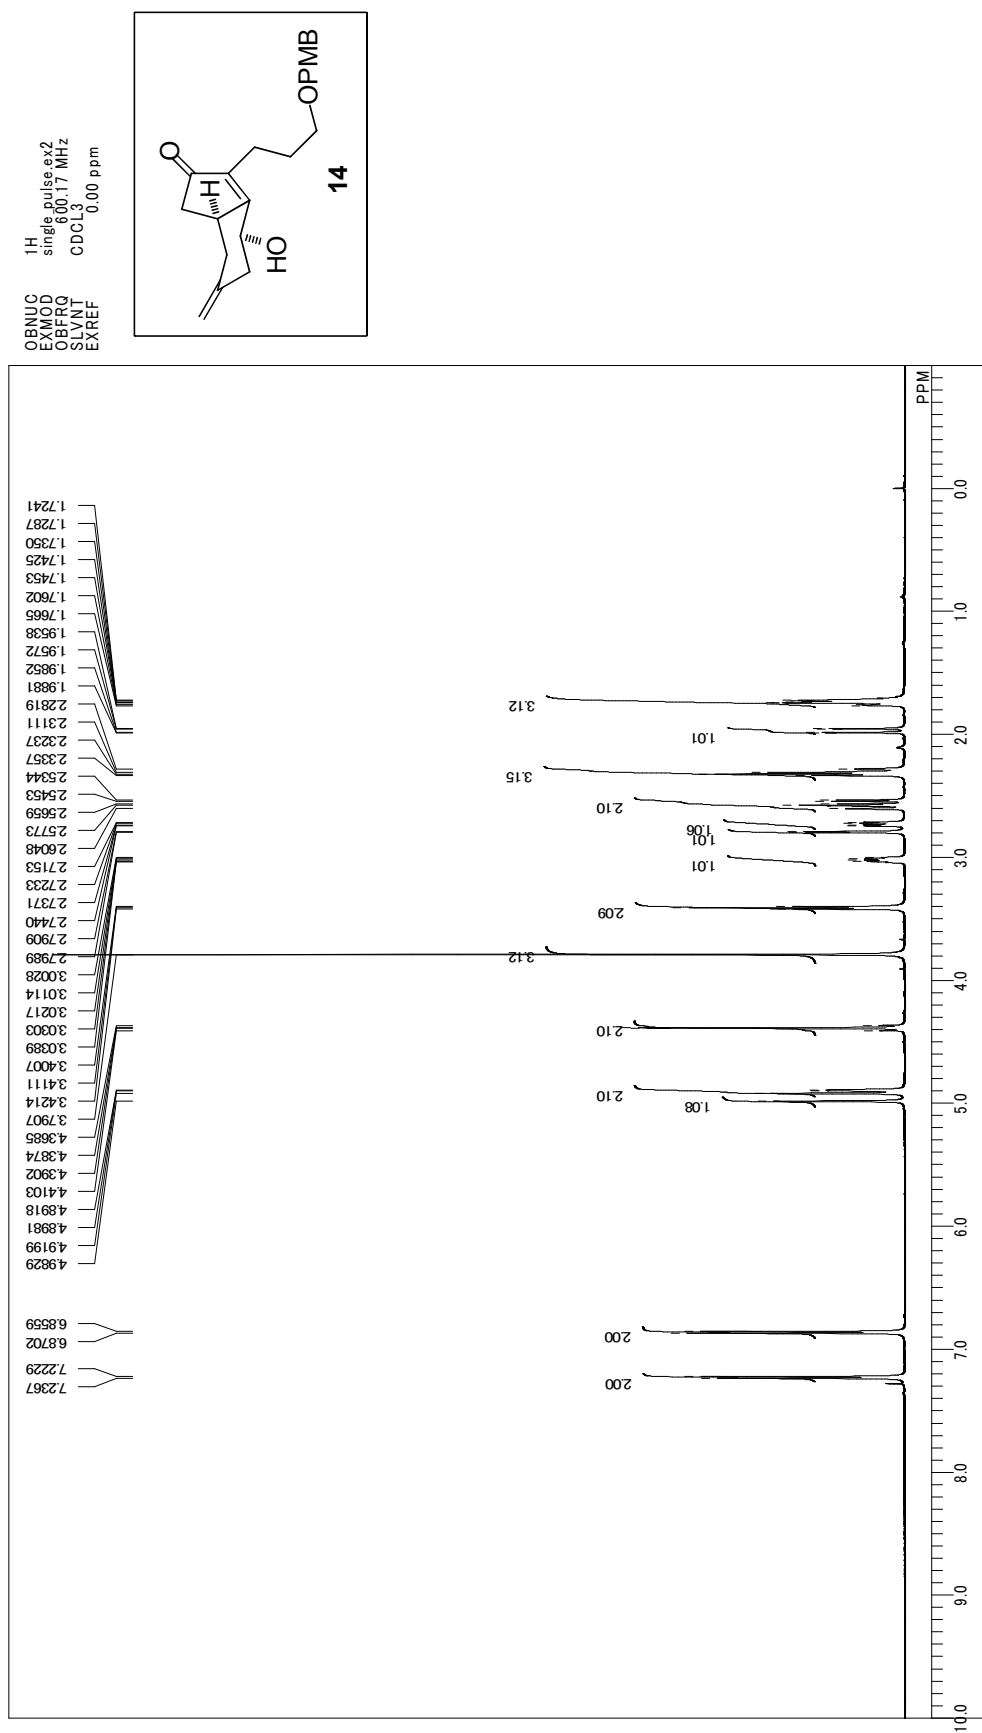

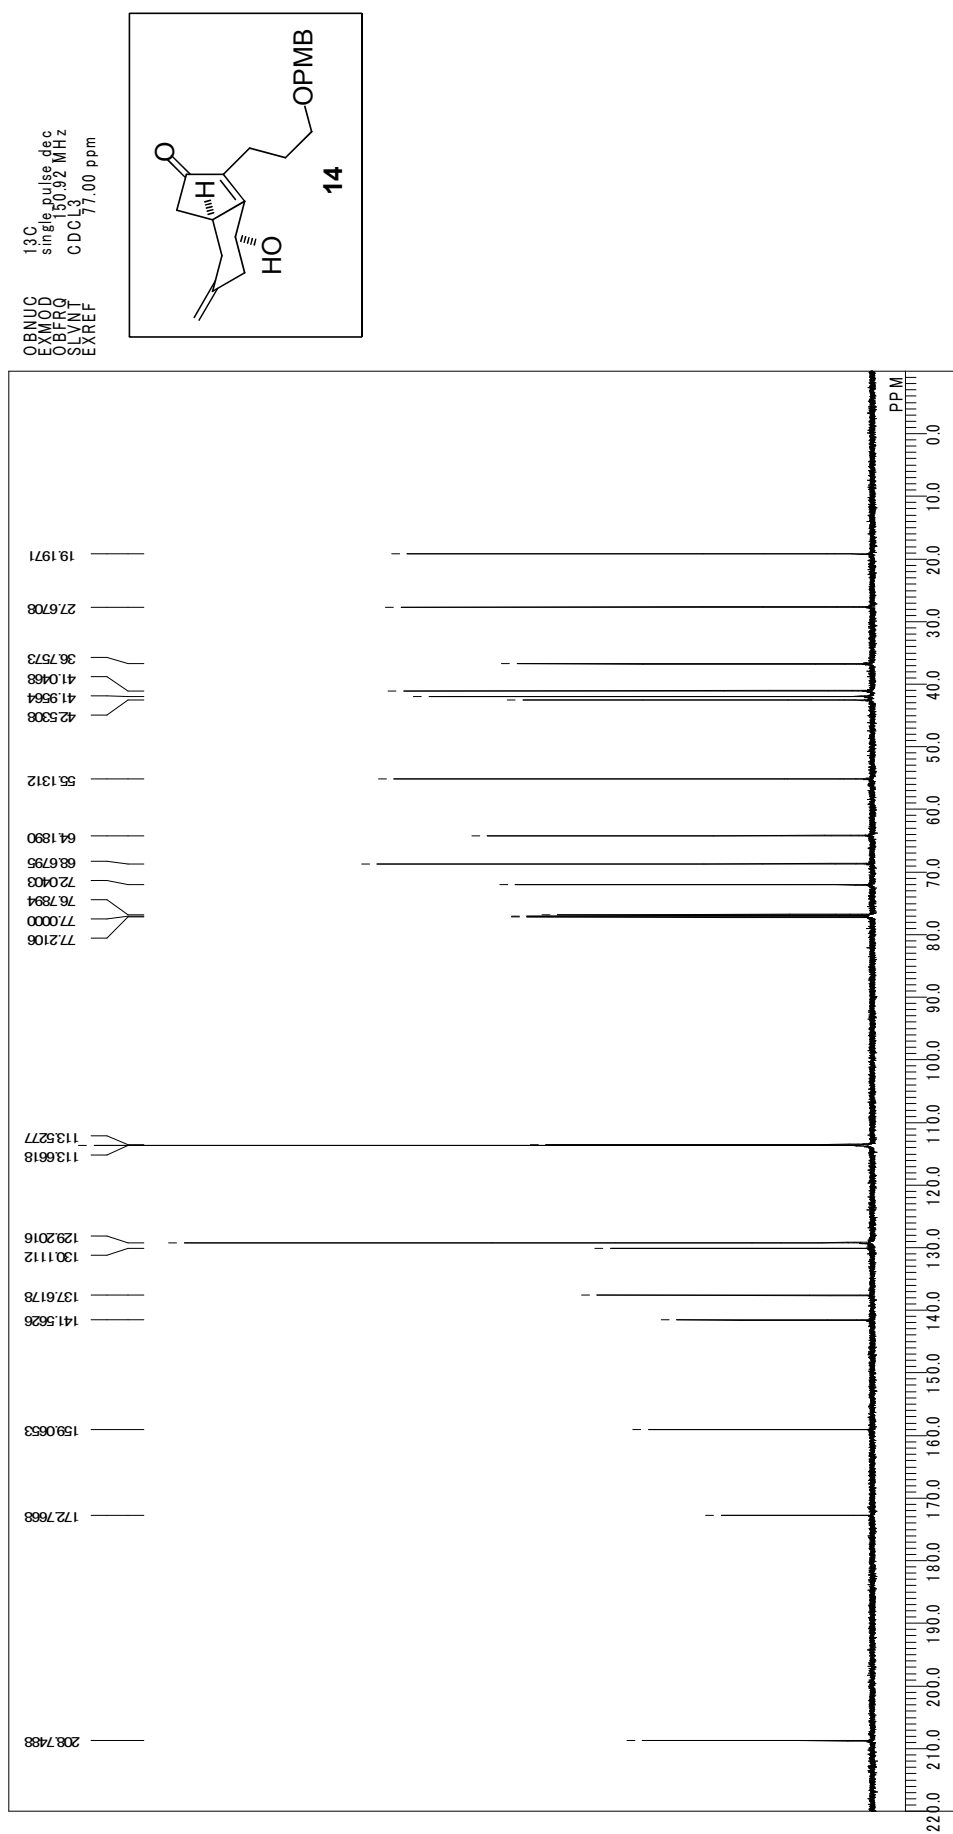

CHROMATOPAC C-R7A CH=1 REPORT No.=5 7071=1:@CHRM1.C00 13/07/04 12:00:52

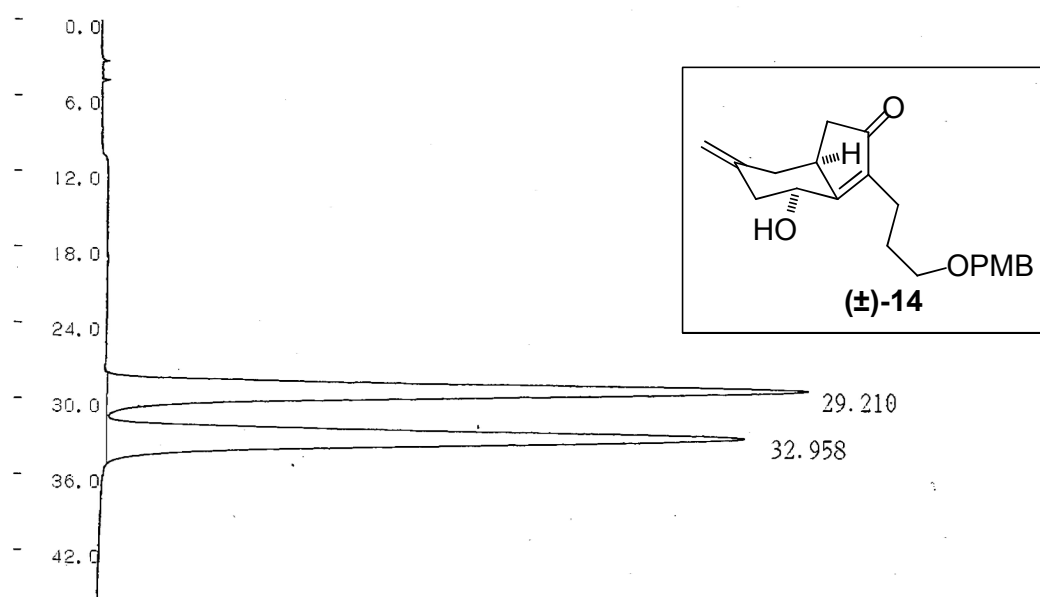

\*\* 定量計算結果 \*\*

| CH    | PKNO | TIME   | AREA   | HEIGHT | MK | IDNO | CONC    | NAME |
|-------|------|--------|--------|--------|----|------|---------|------|
| 1     | 1    | 29.21  | 456676 | 6245   |    |      | 49.9458 |      |
|       | 2    | 32.958 | 457667 | 5681   |    |      | 50.0542 |      |
| TOTAL |      |        | 914343 | 11926  |    |      | 100     |      |

CHROMATOPAC C-R7A CH=1 REPORT No.=2 7071=1:@CHRM1.C00 13/07/04 08:57:06

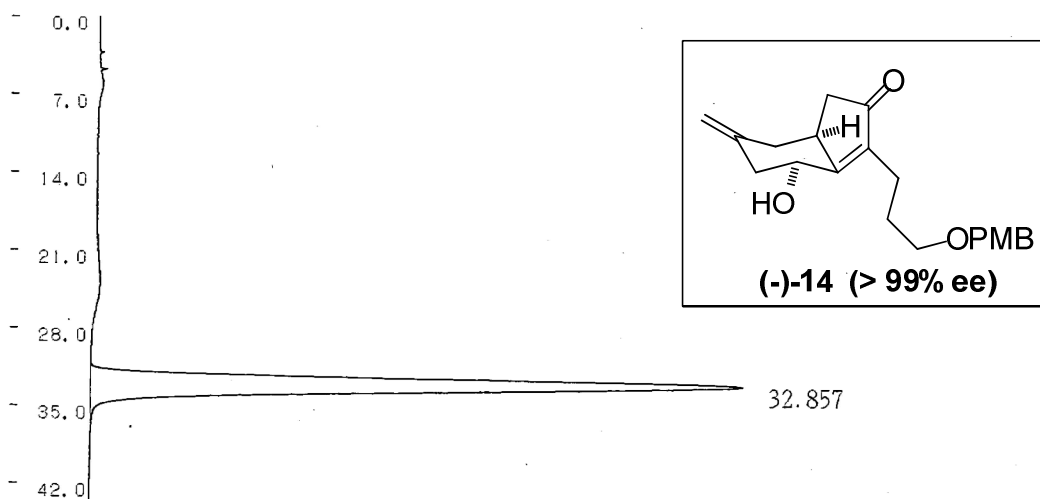

\*\* 定量計算結果 \*\*

| CH    | PKNO | TIME   | AREA   | HEIGHT | MK | IDNO | CONC | NAME |
|-------|------|--------|--------|--------|----|------|------|------|
| 1     | 1    | 32.857 | 951164 | 11653  |    |      | 100  |      |
| TOTAL |      |        | 951164 | 11653  |    |      | 100  |      |

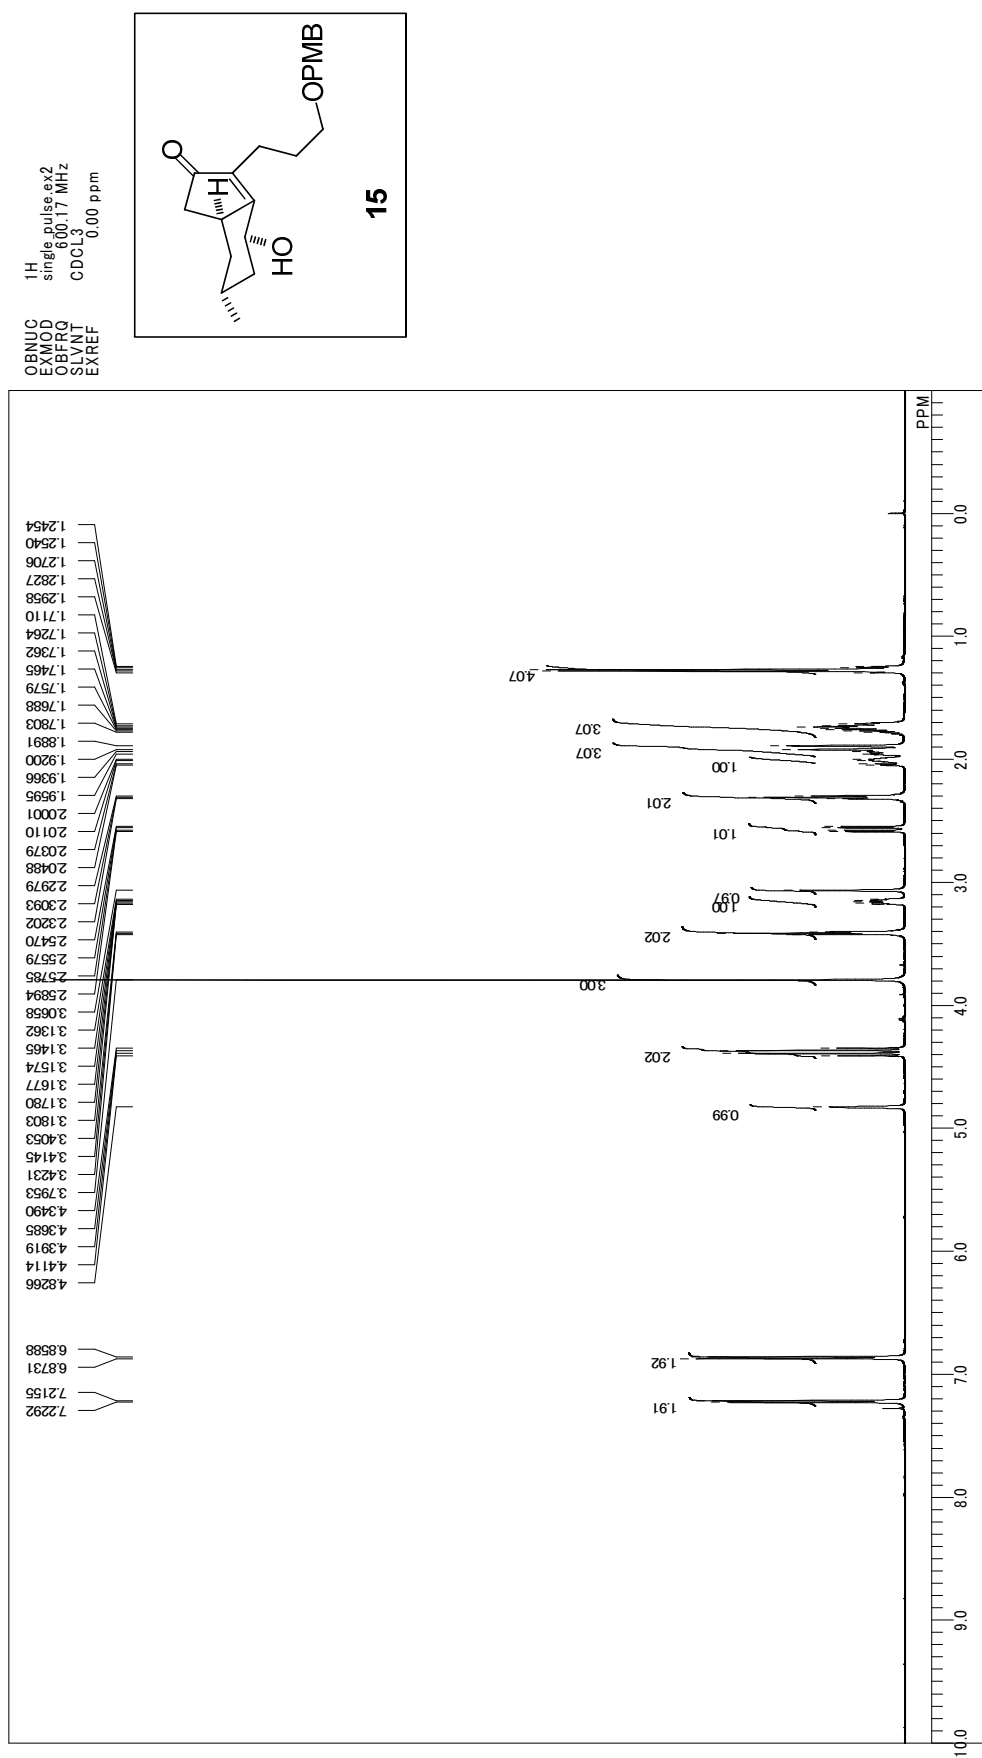

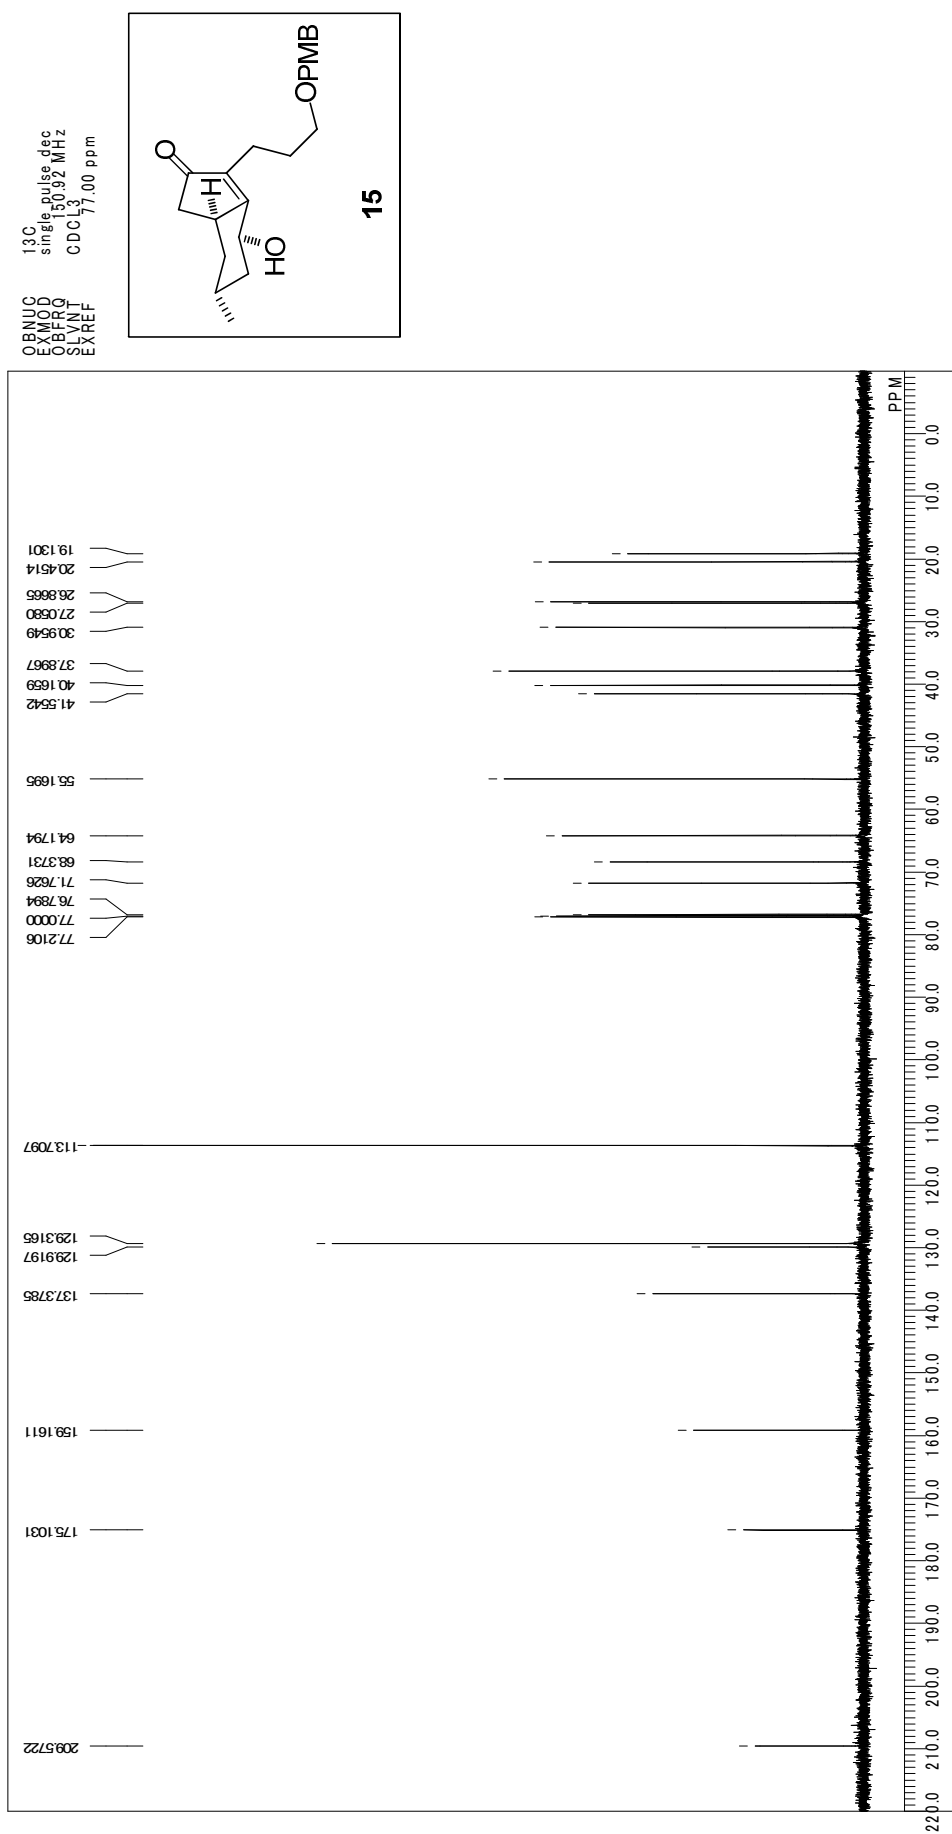

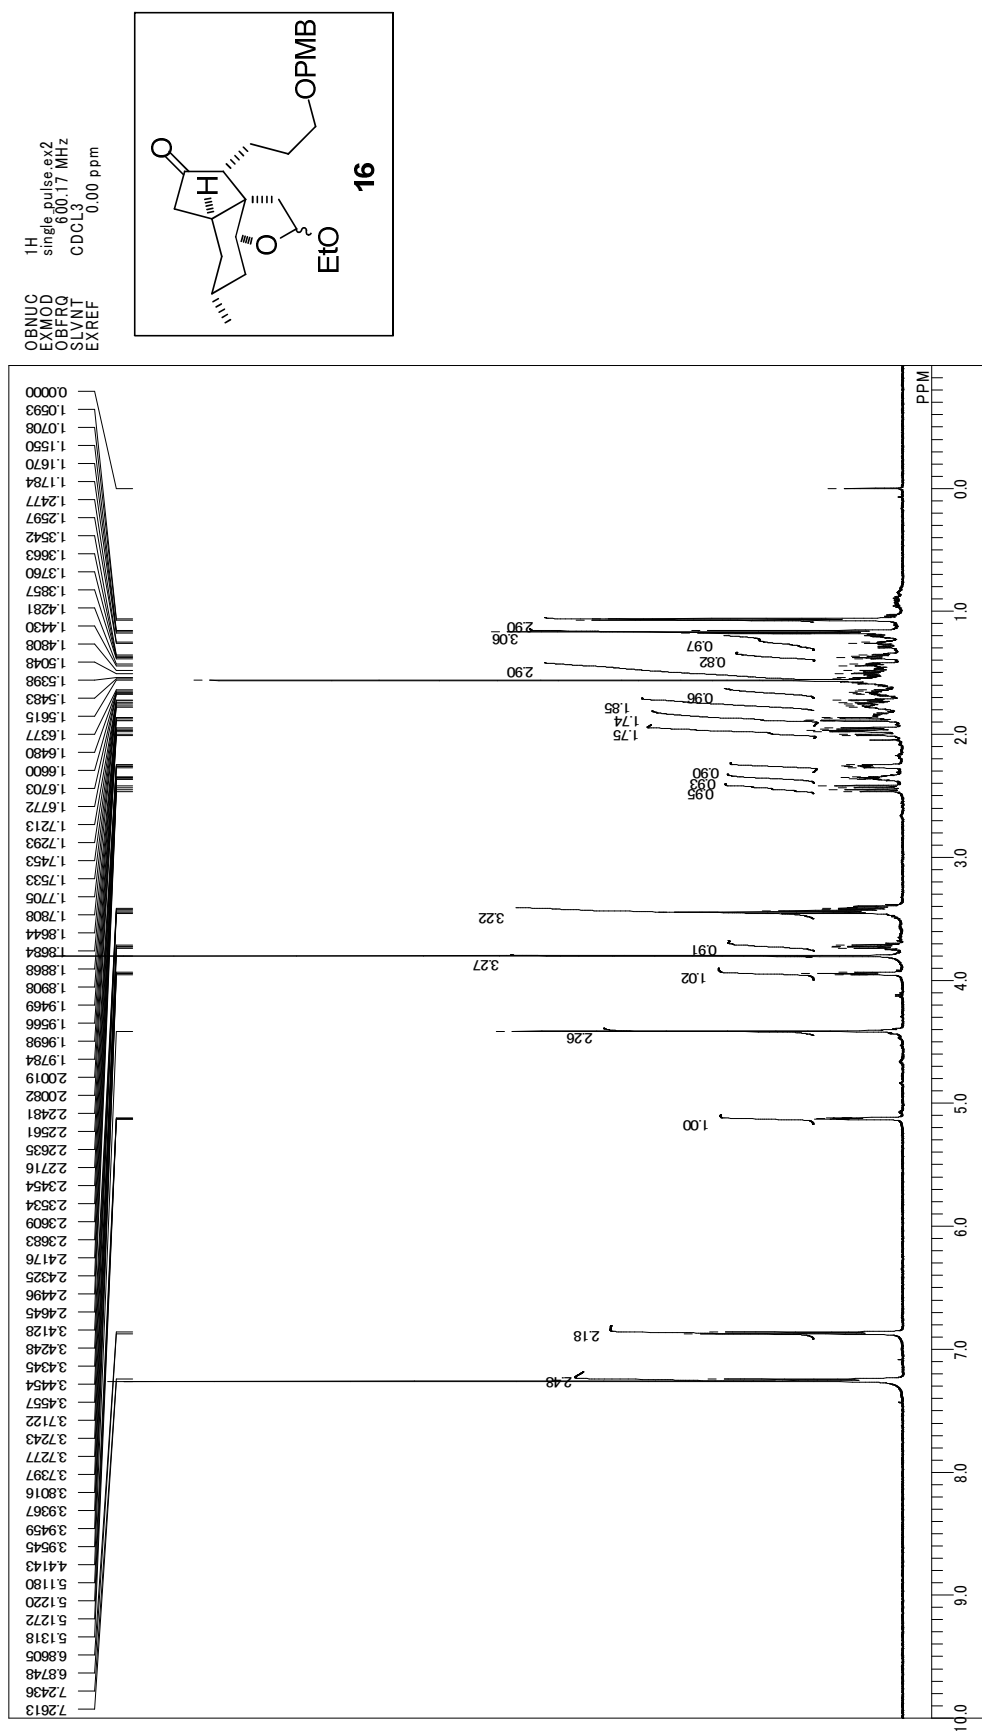



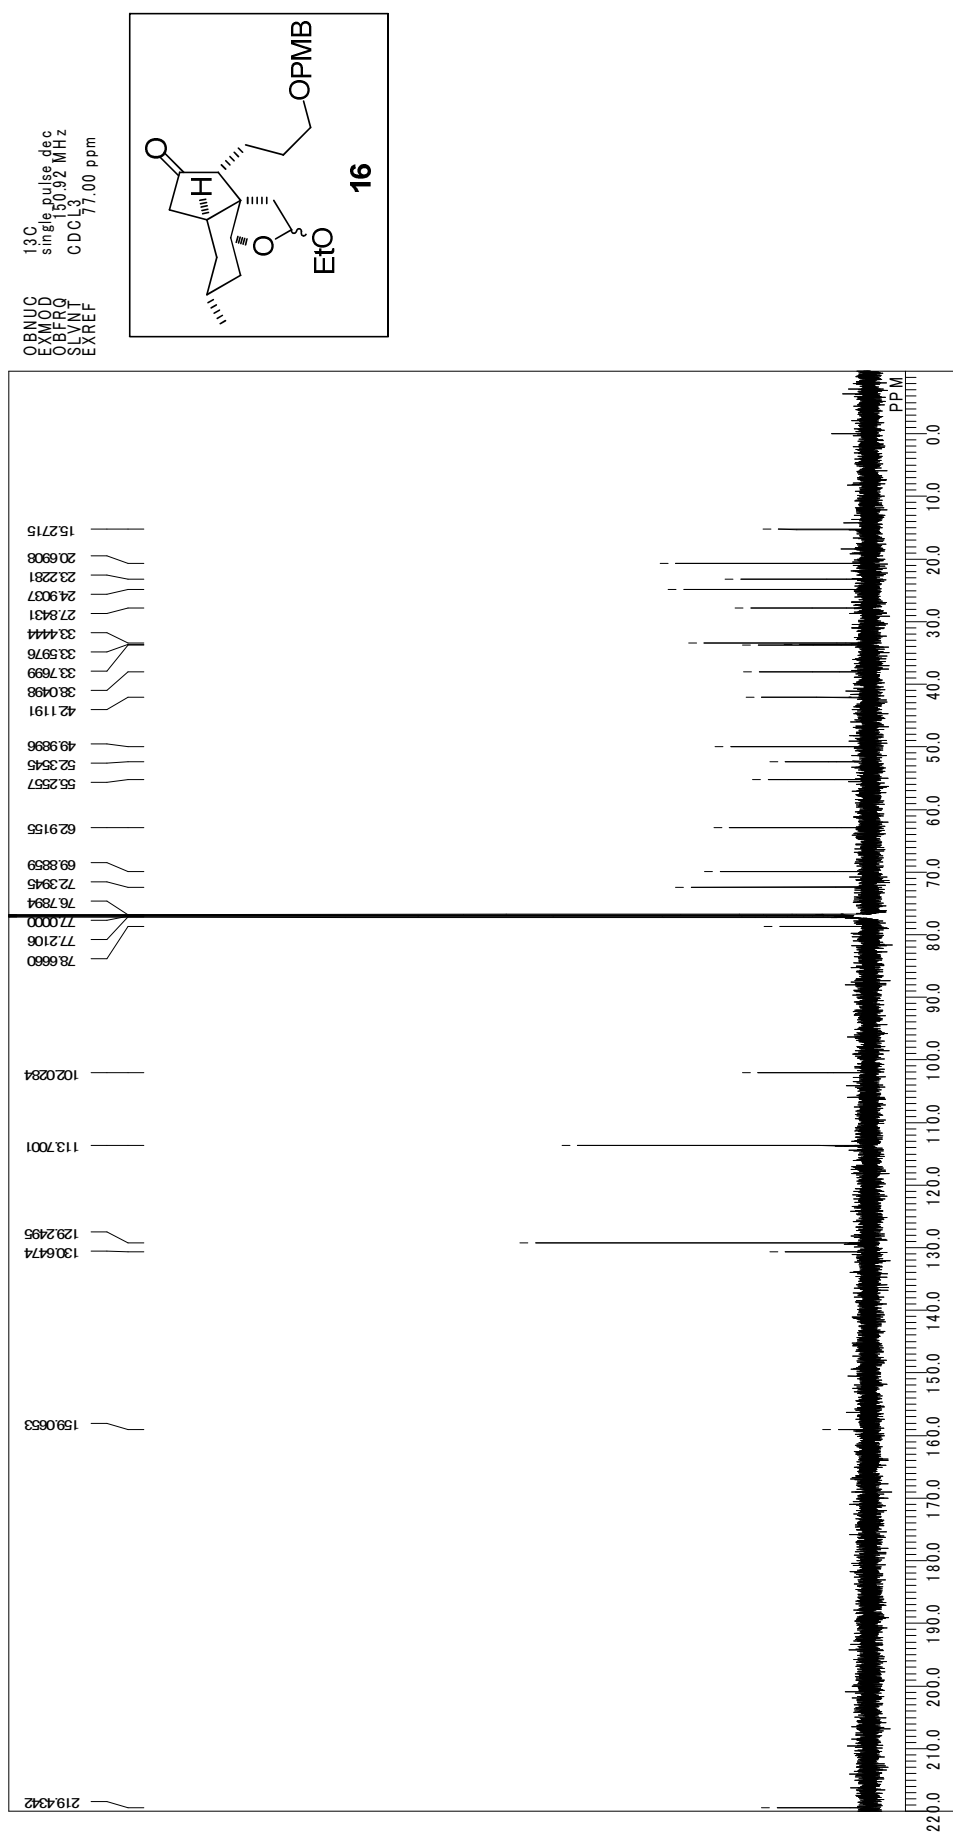

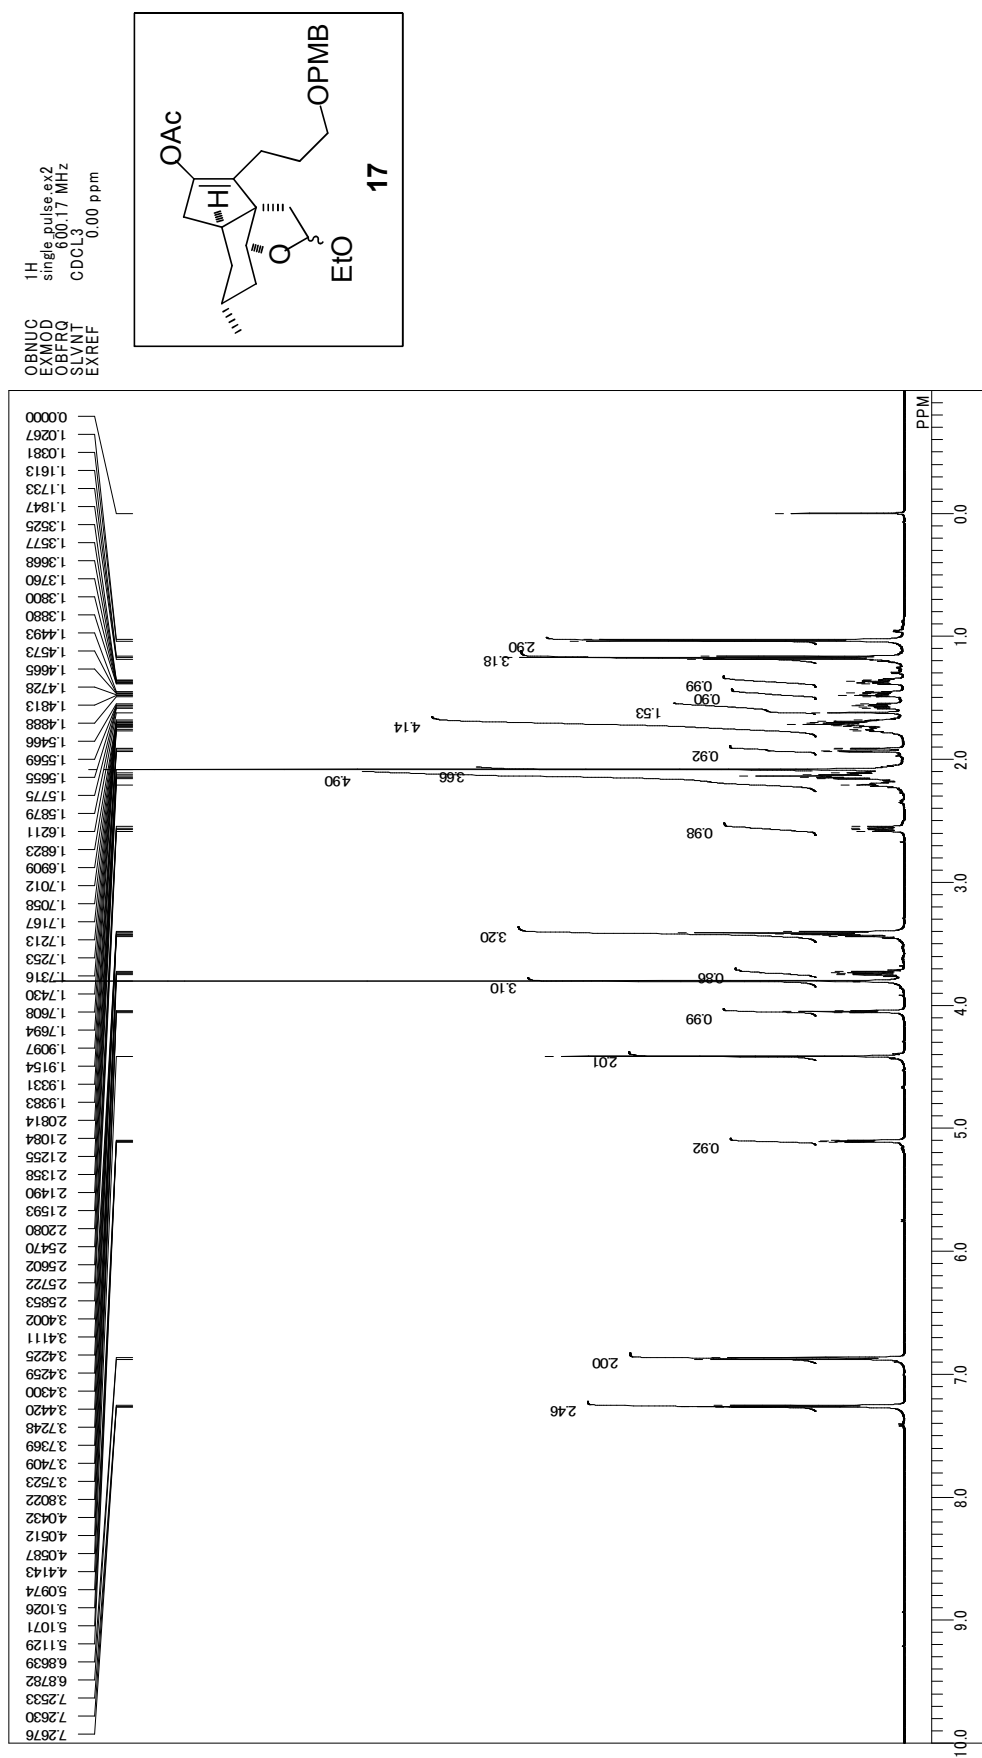

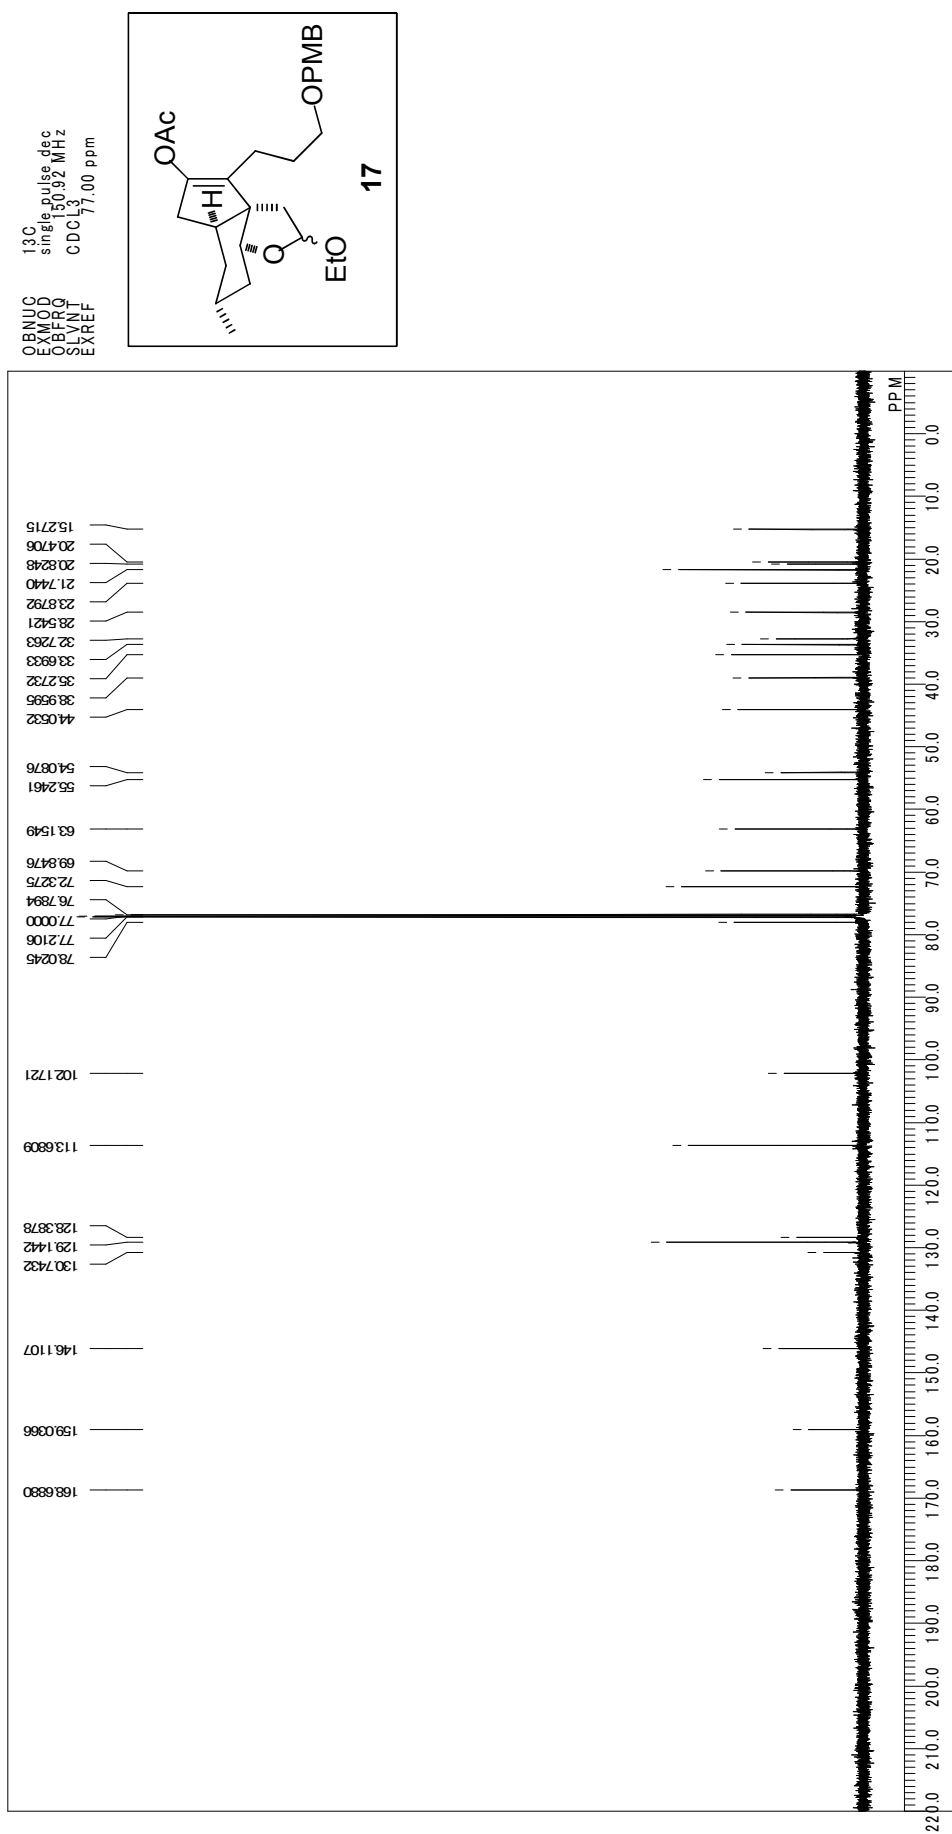

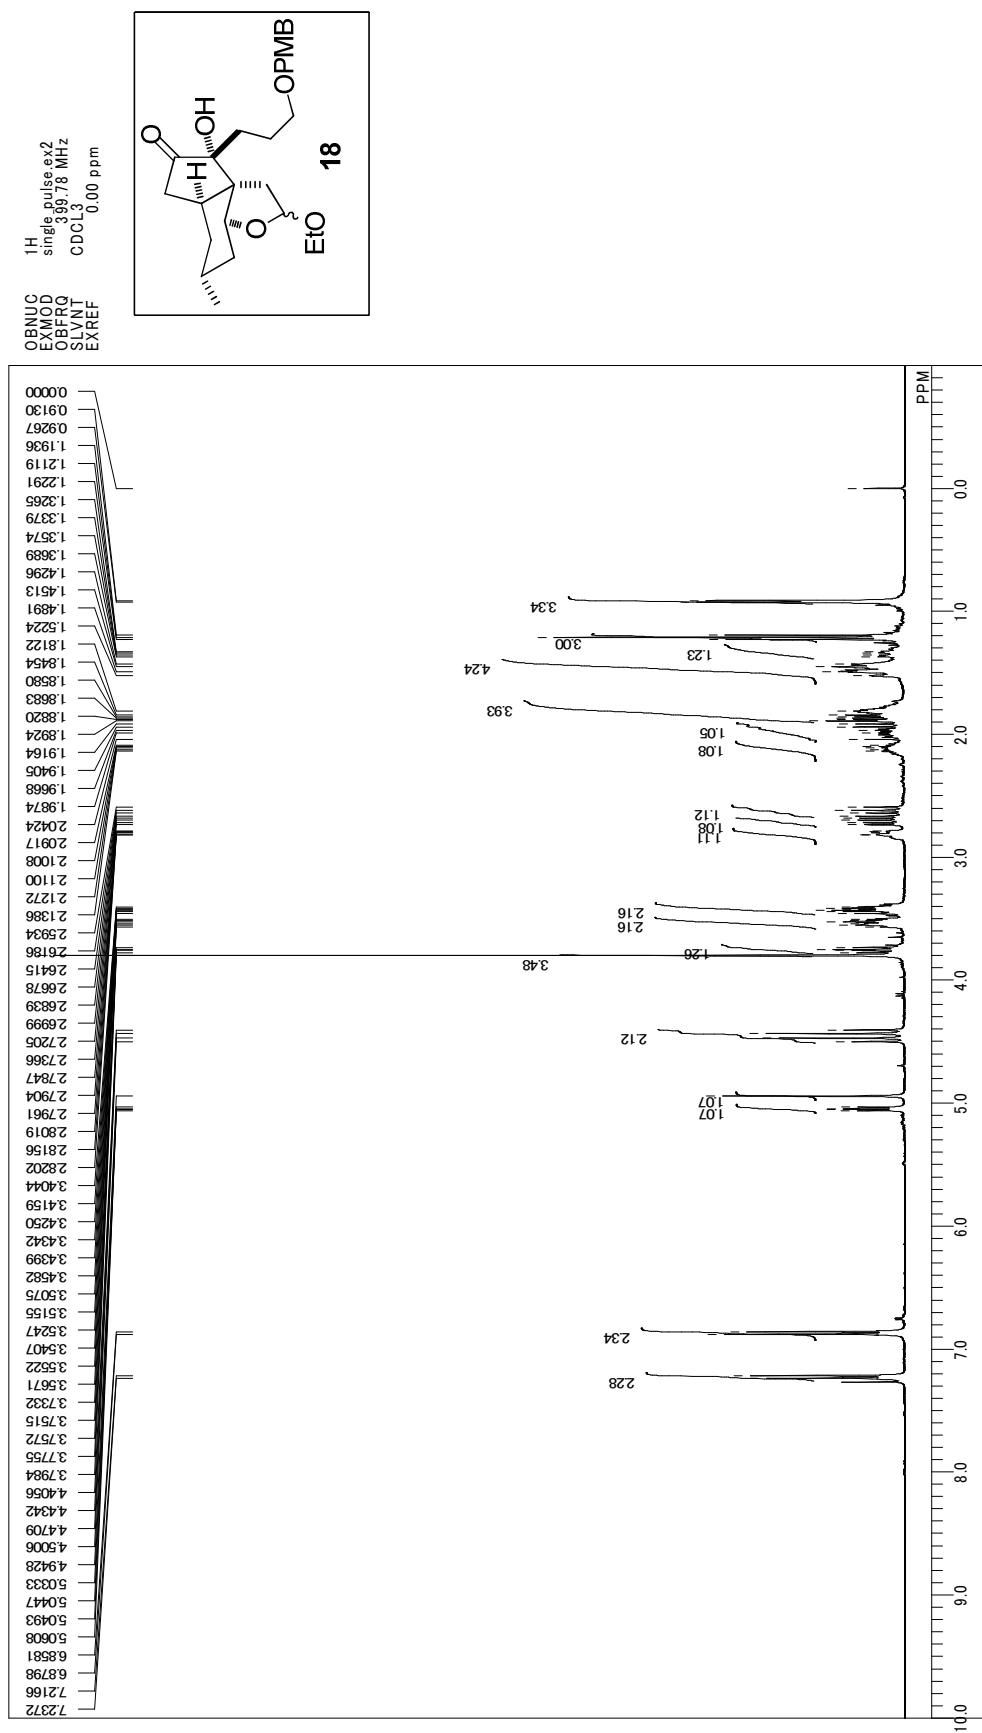

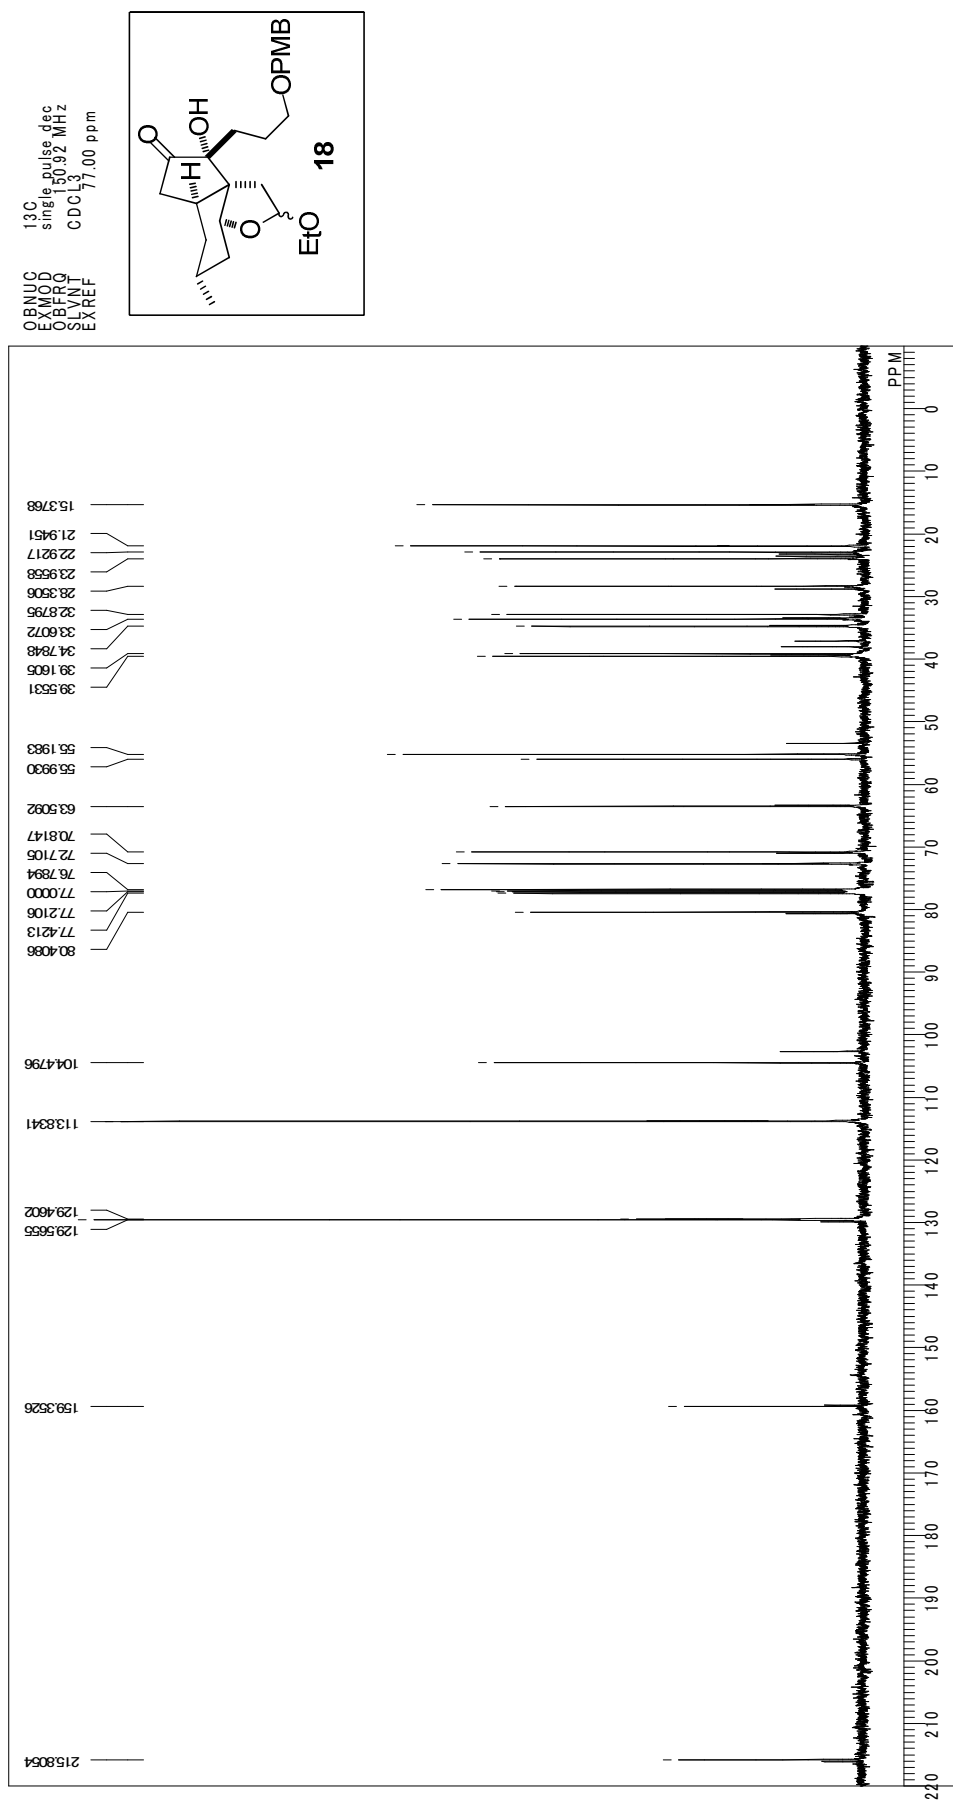

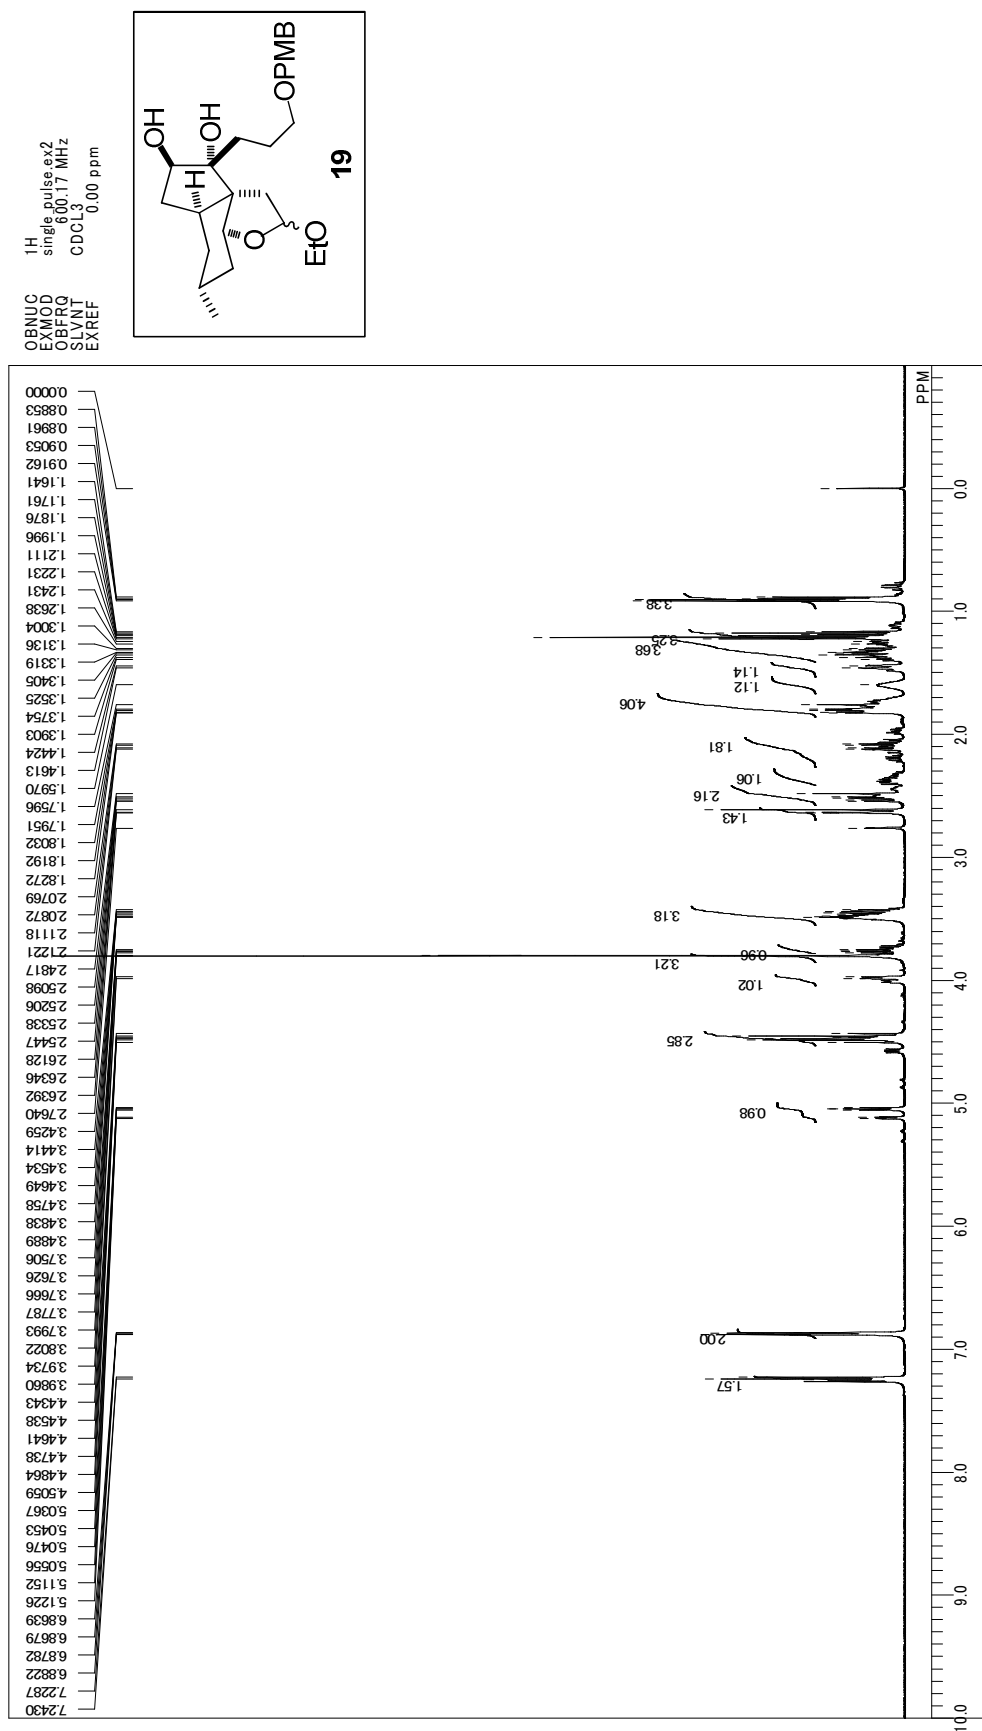

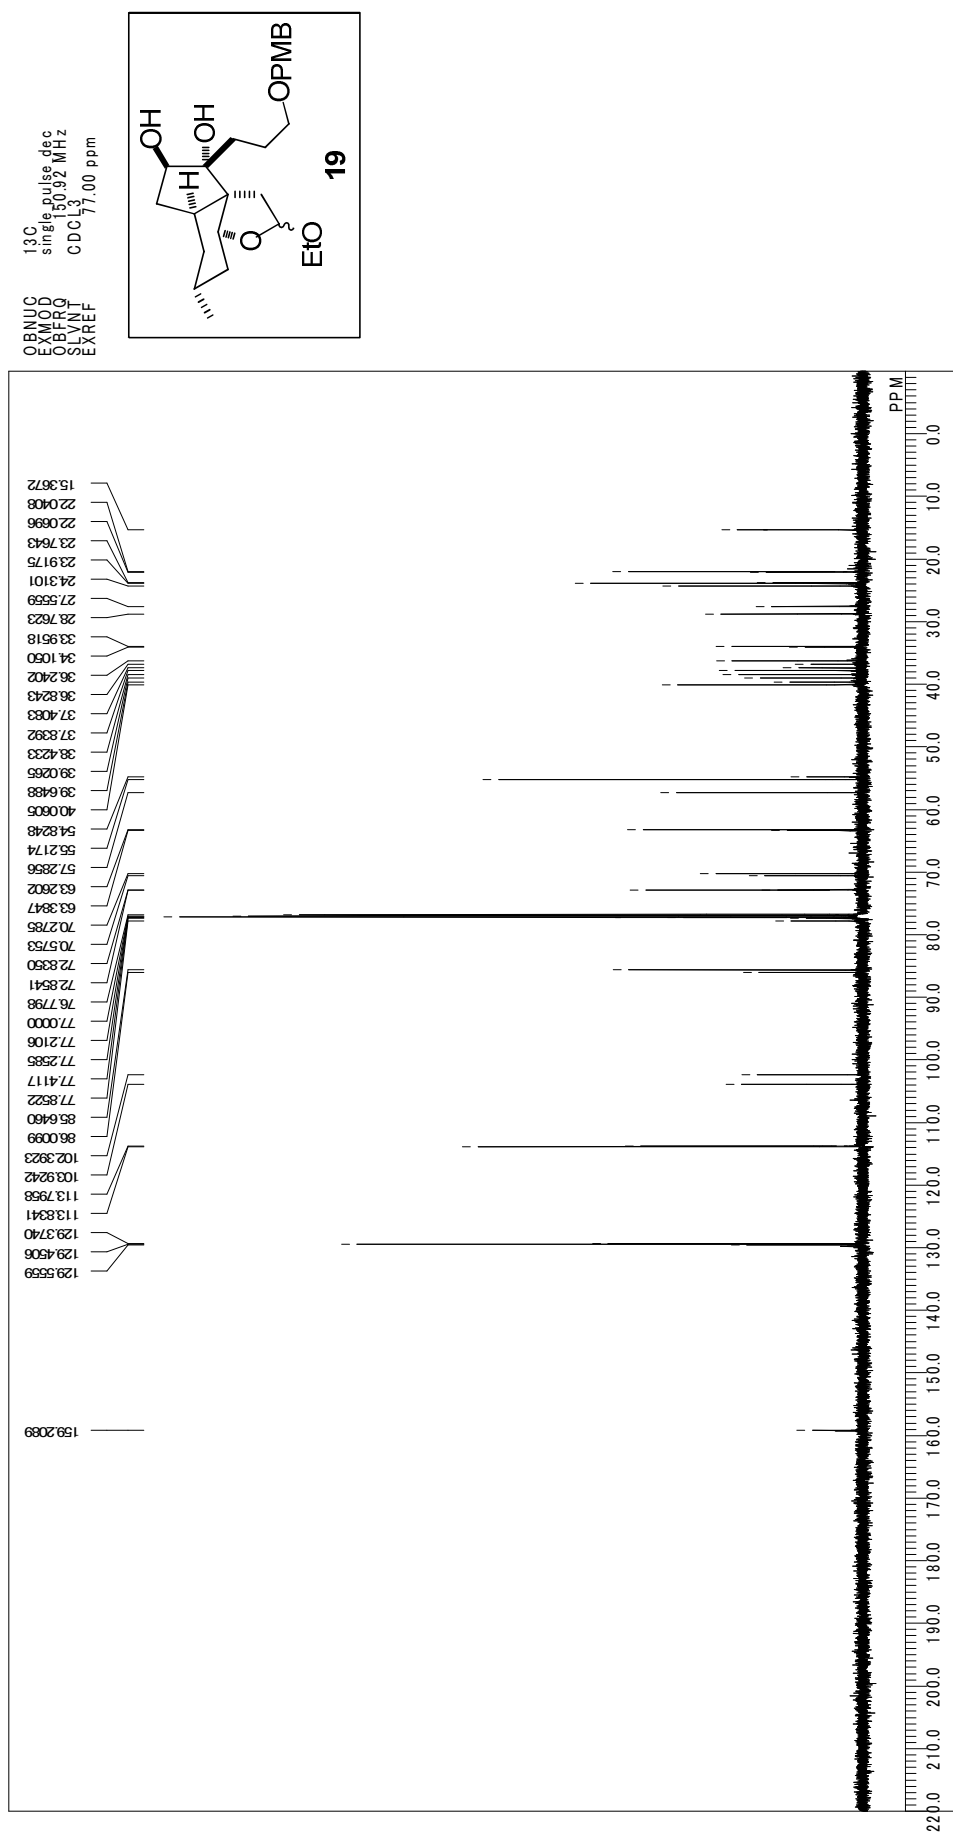

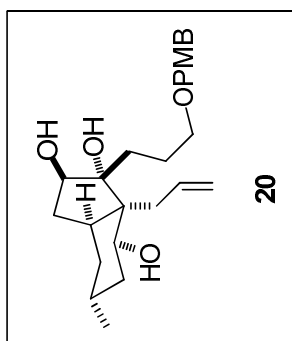



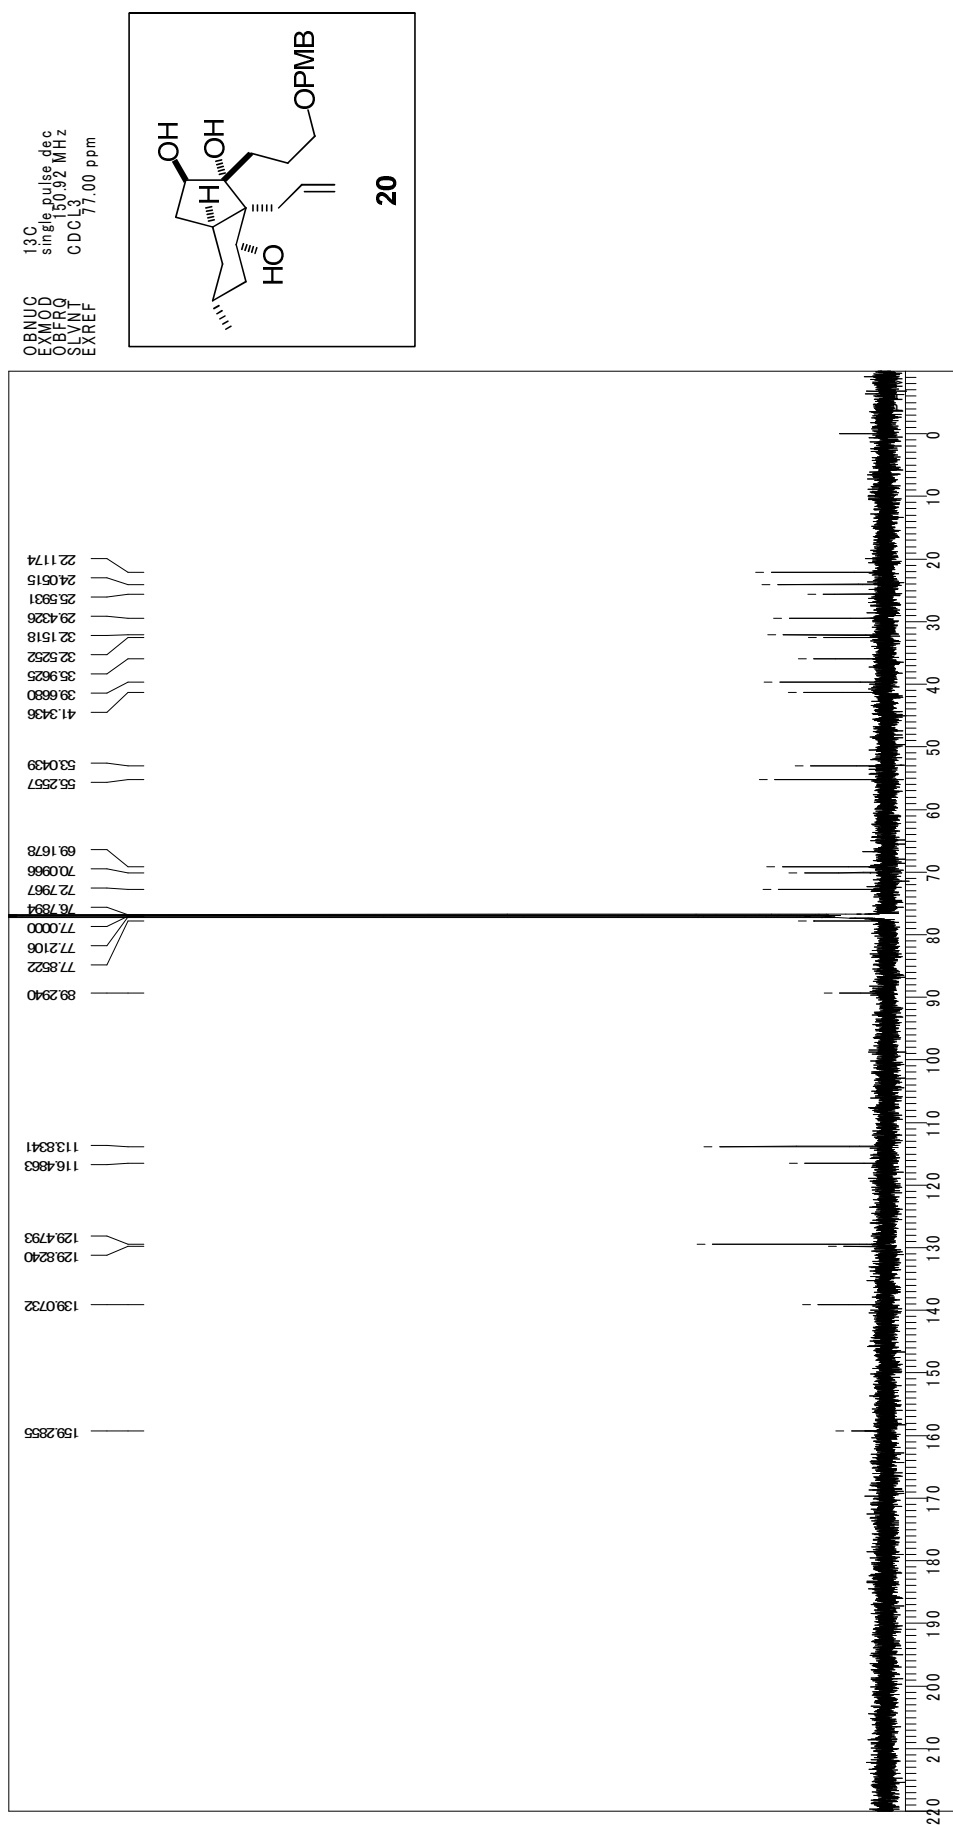

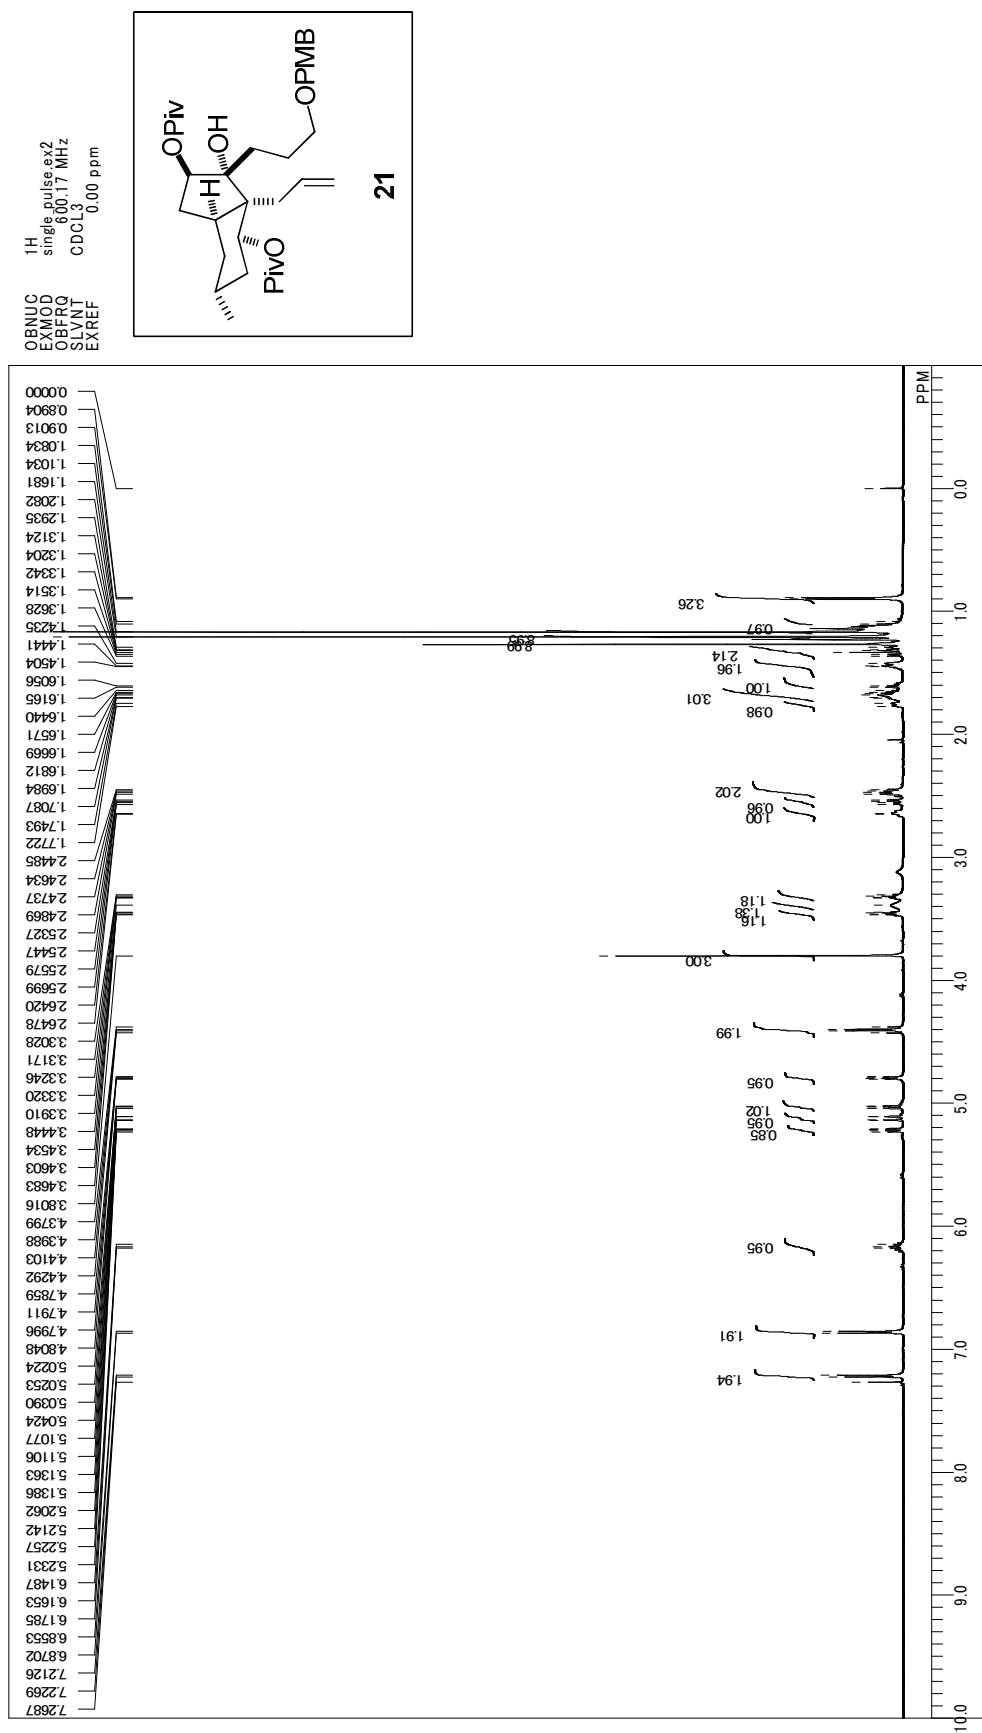

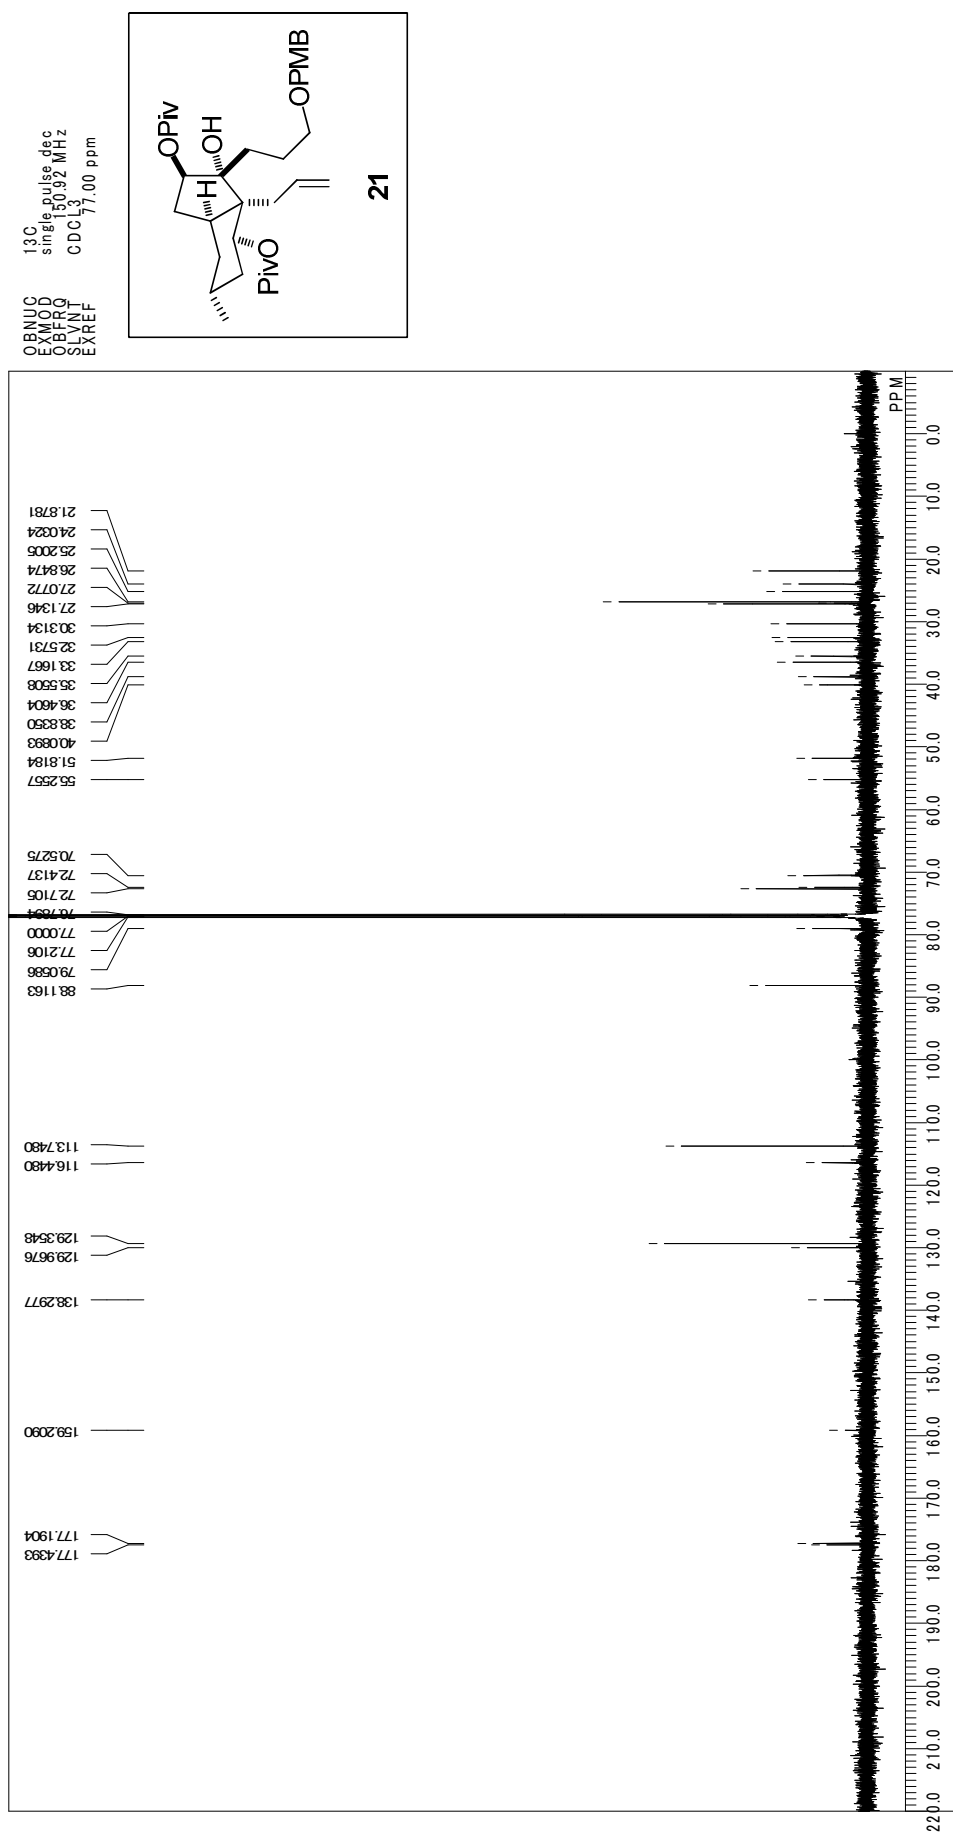

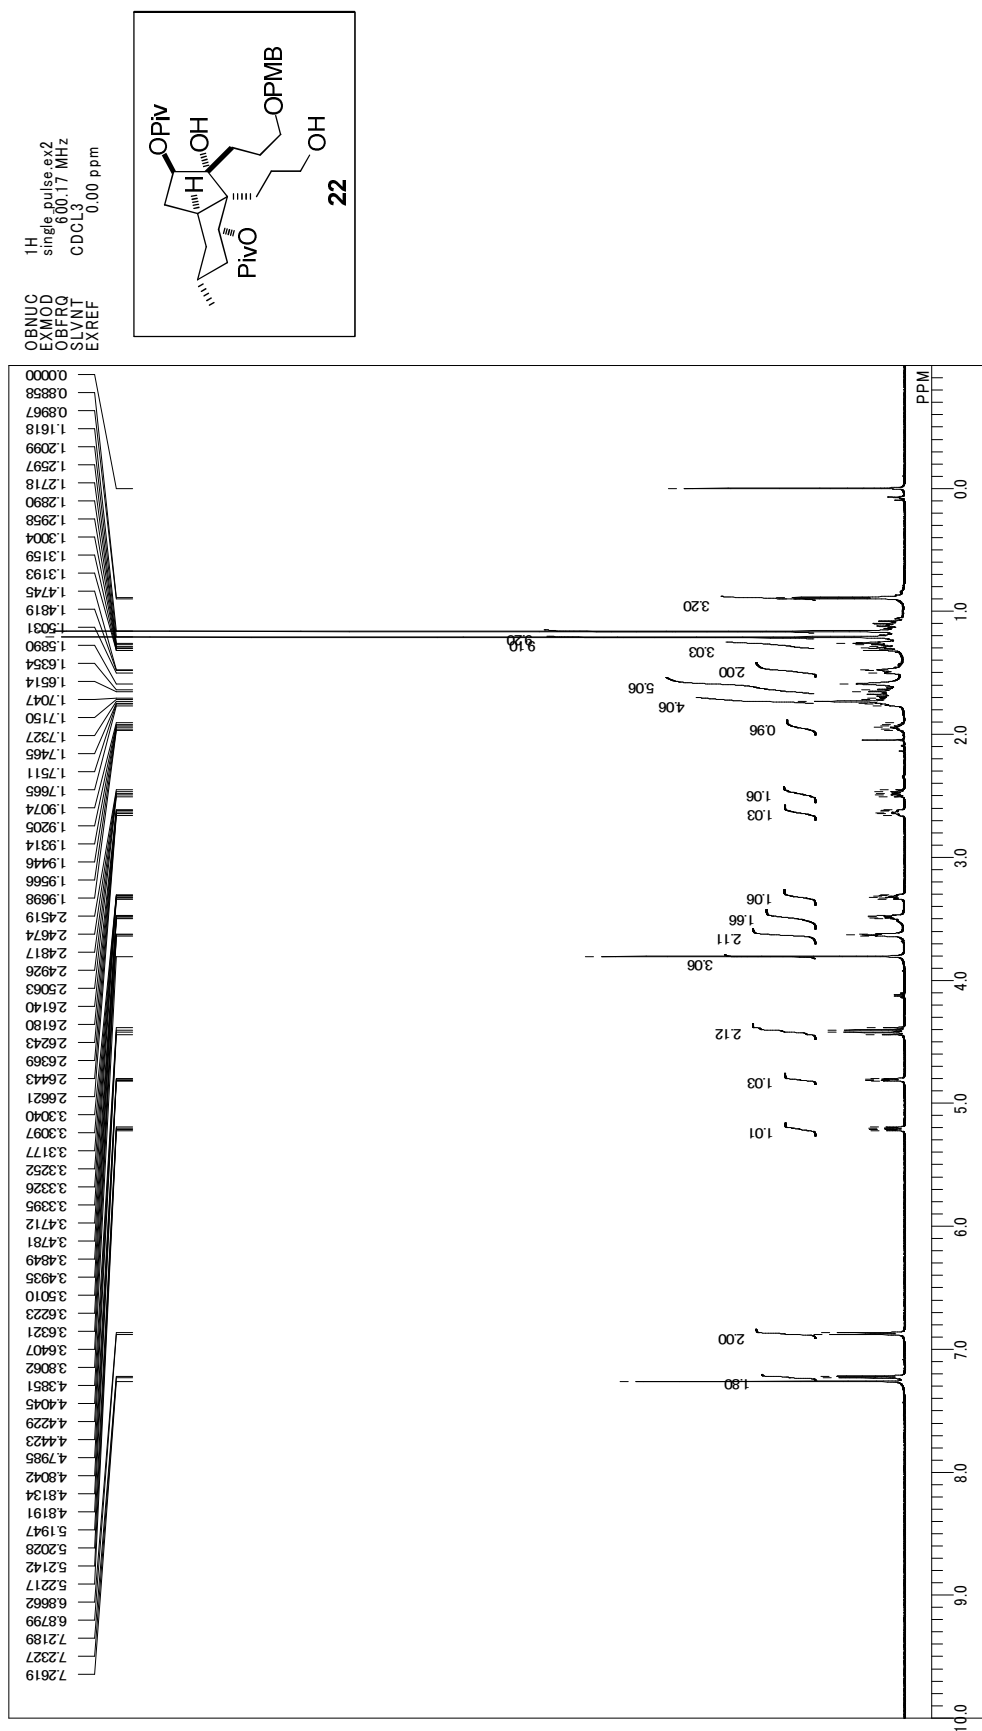

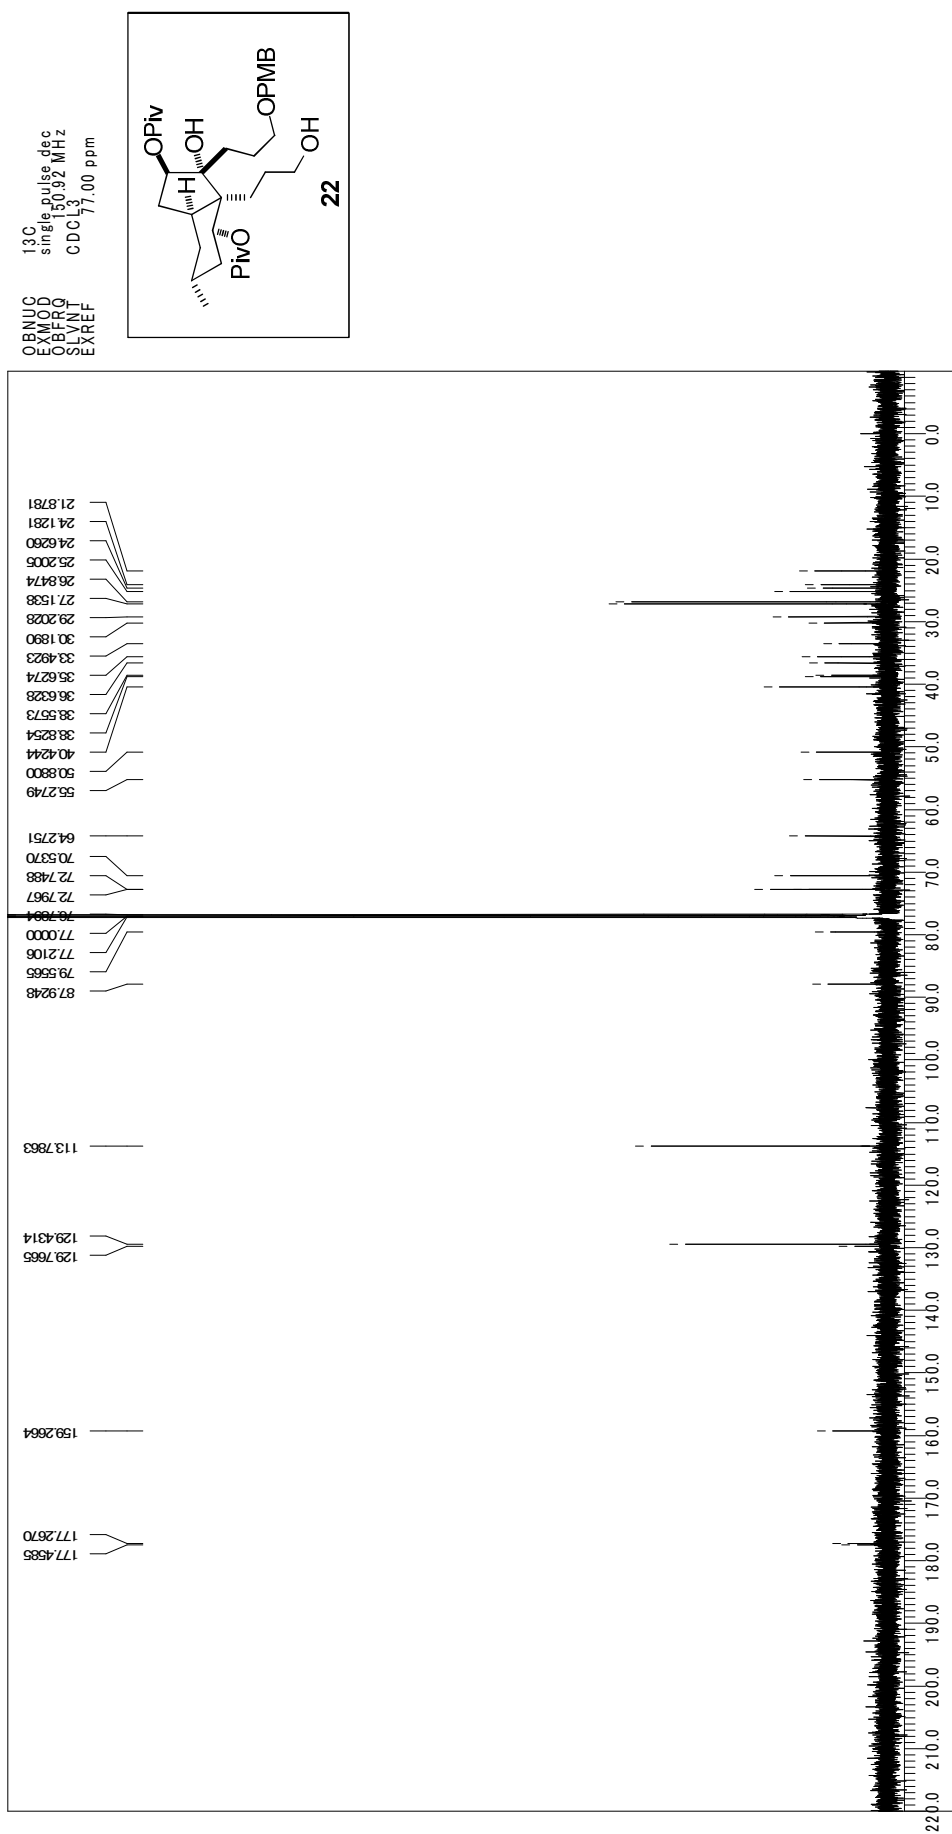



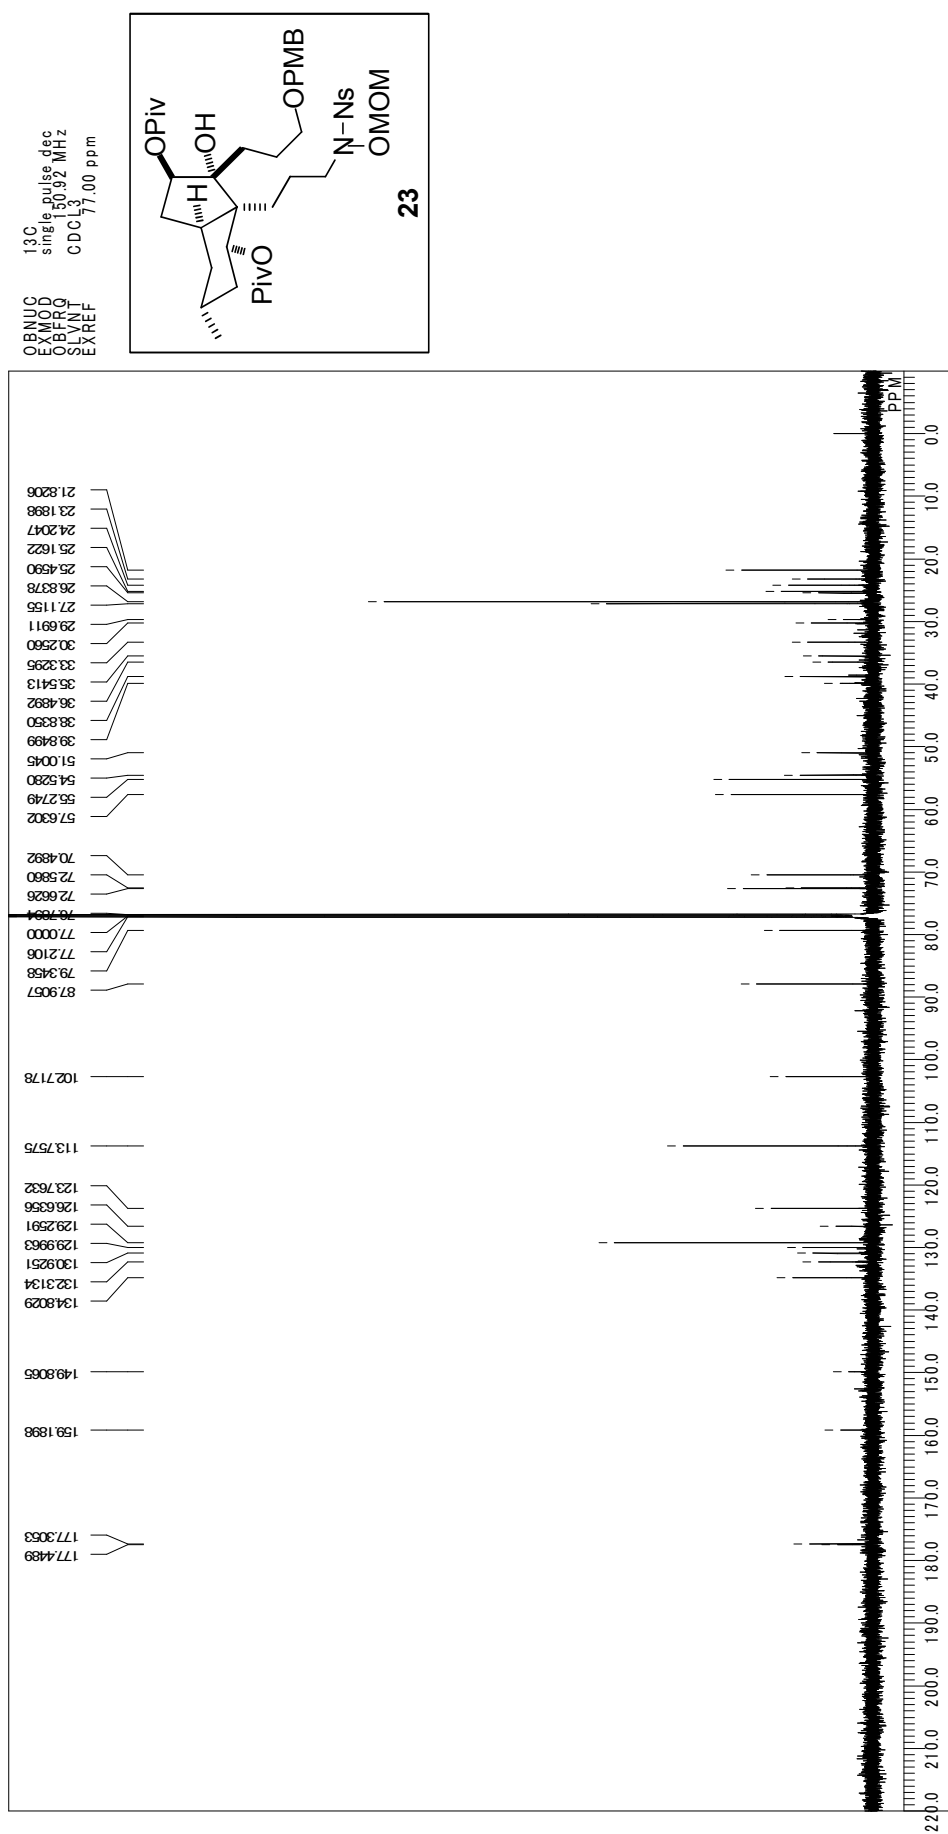





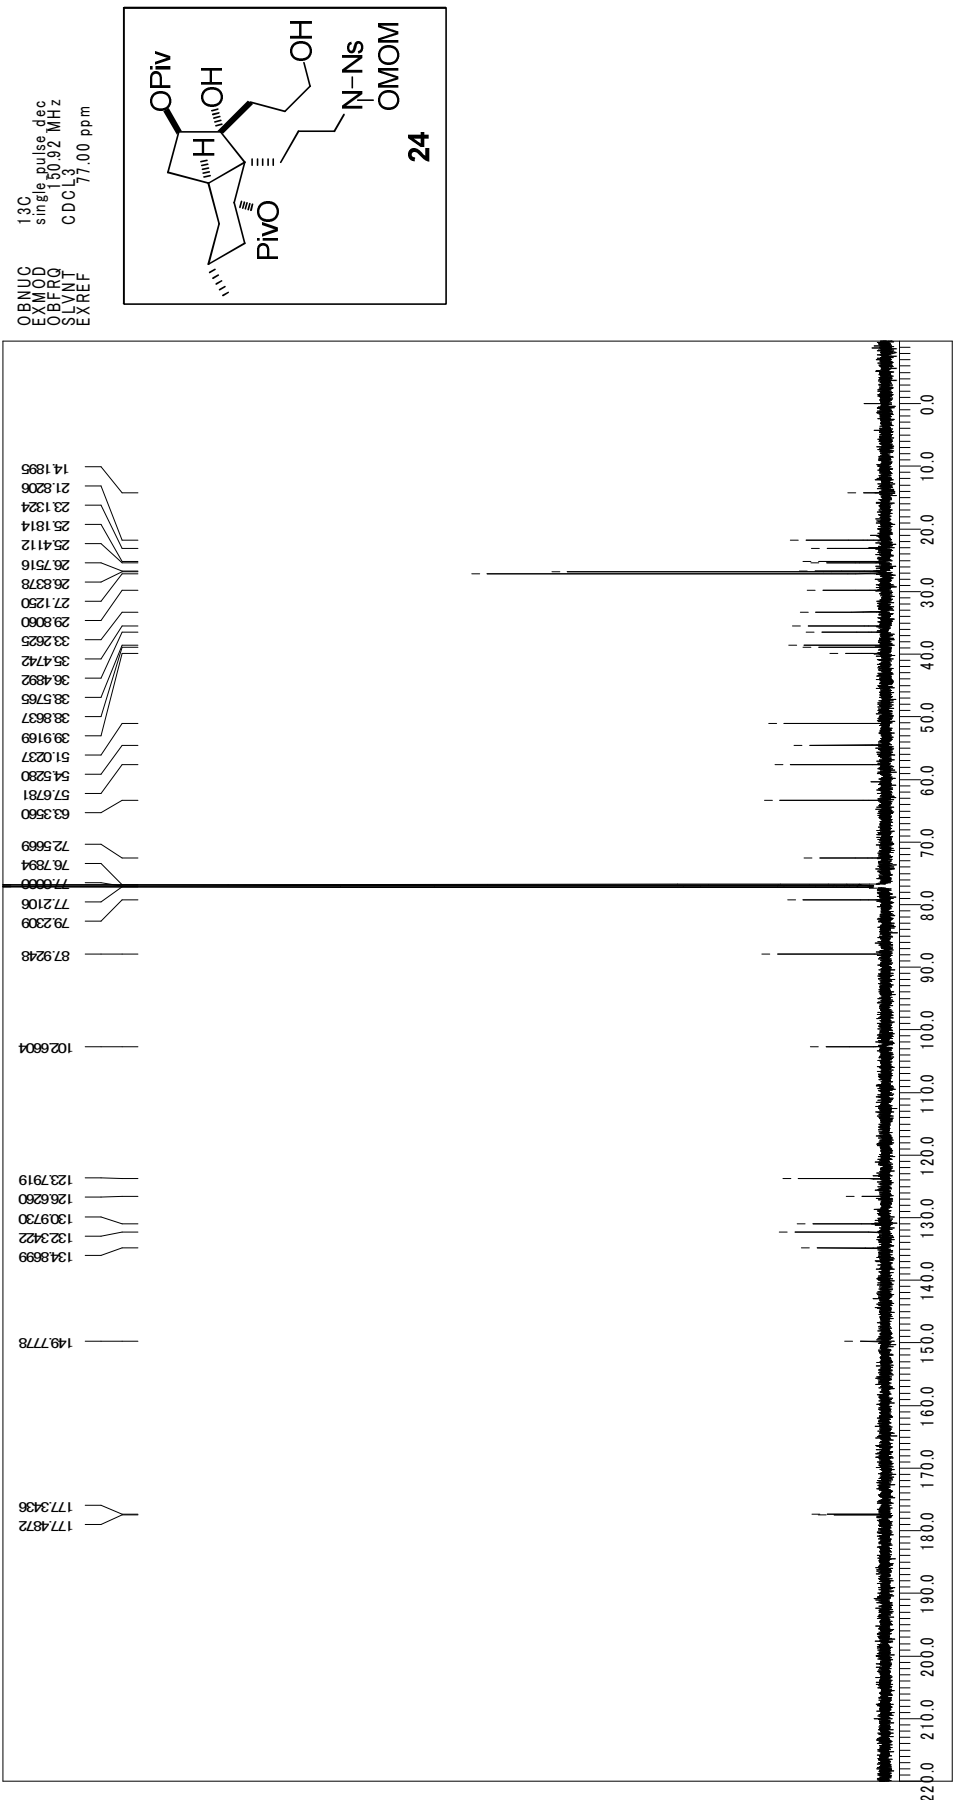

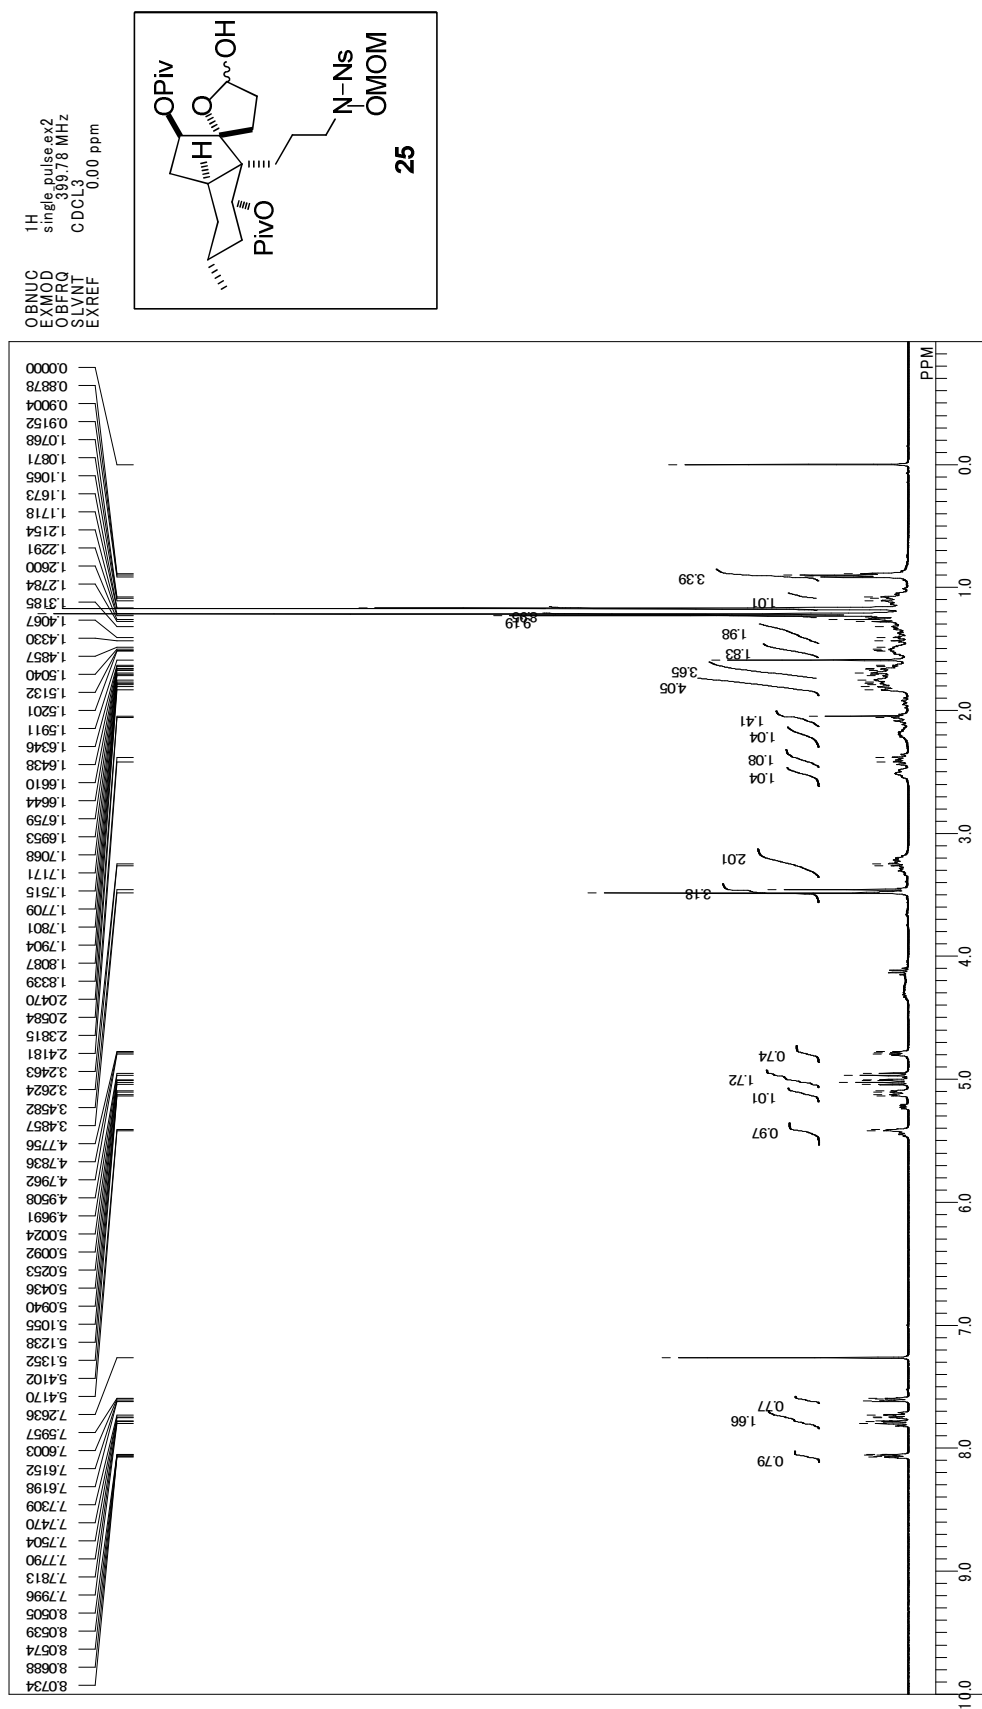

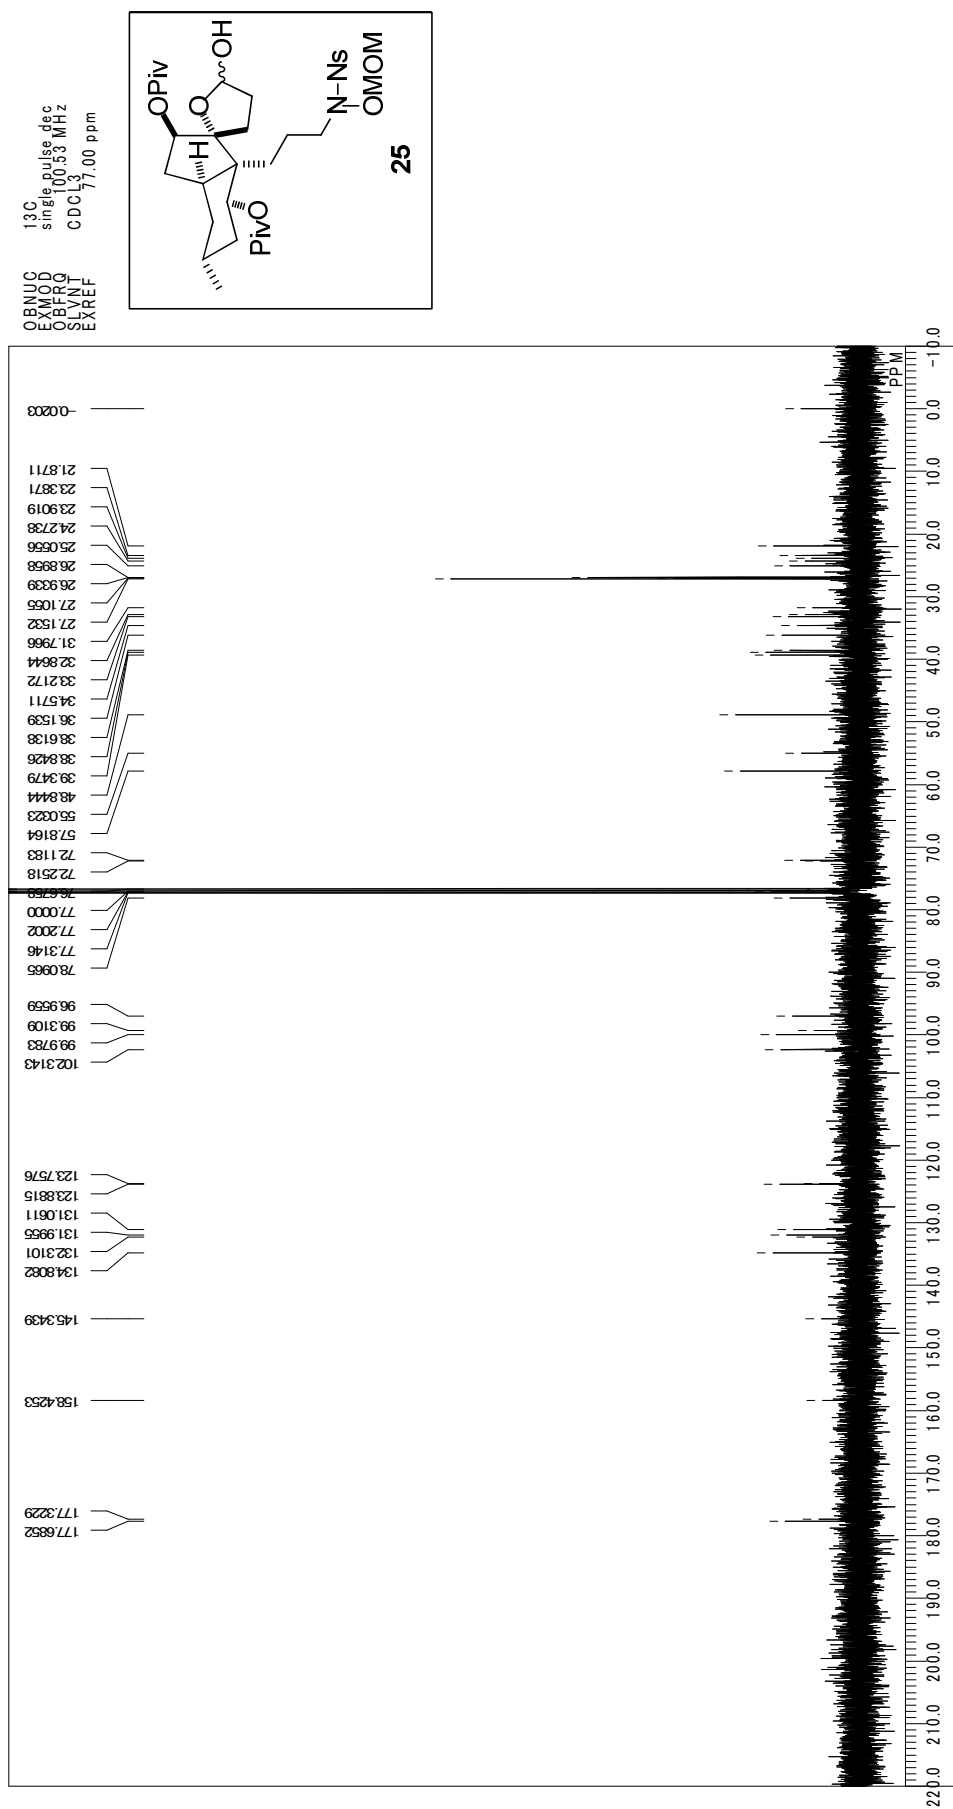



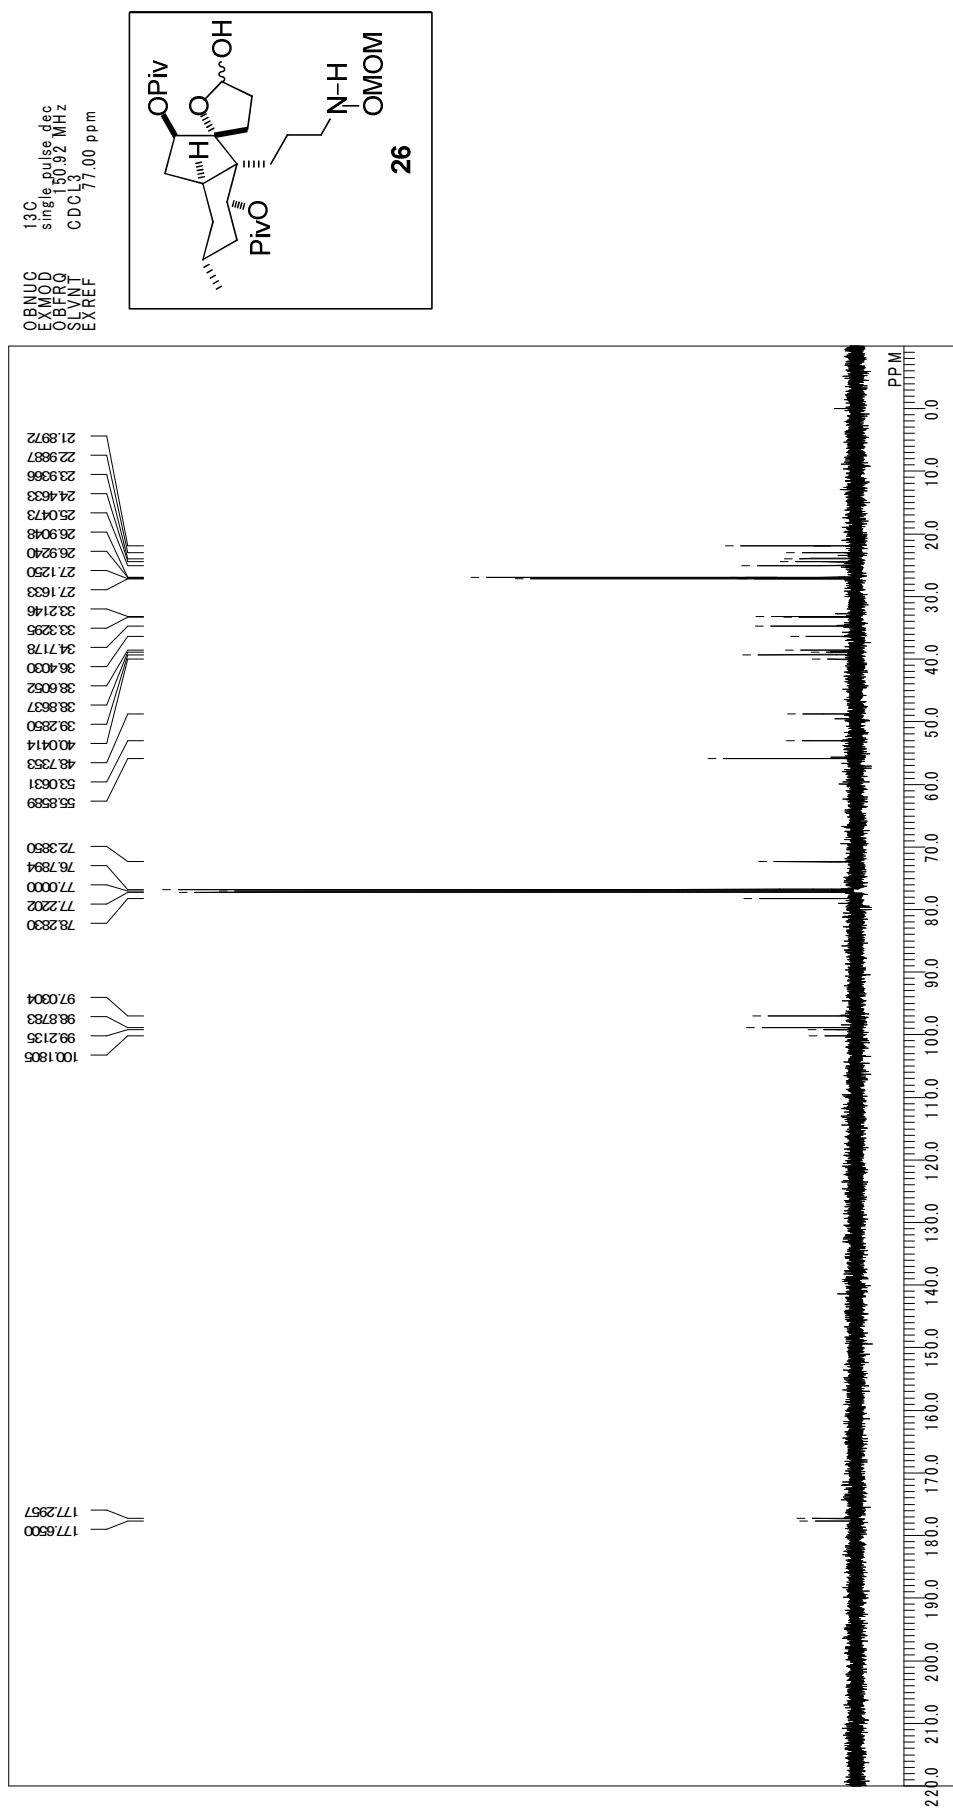

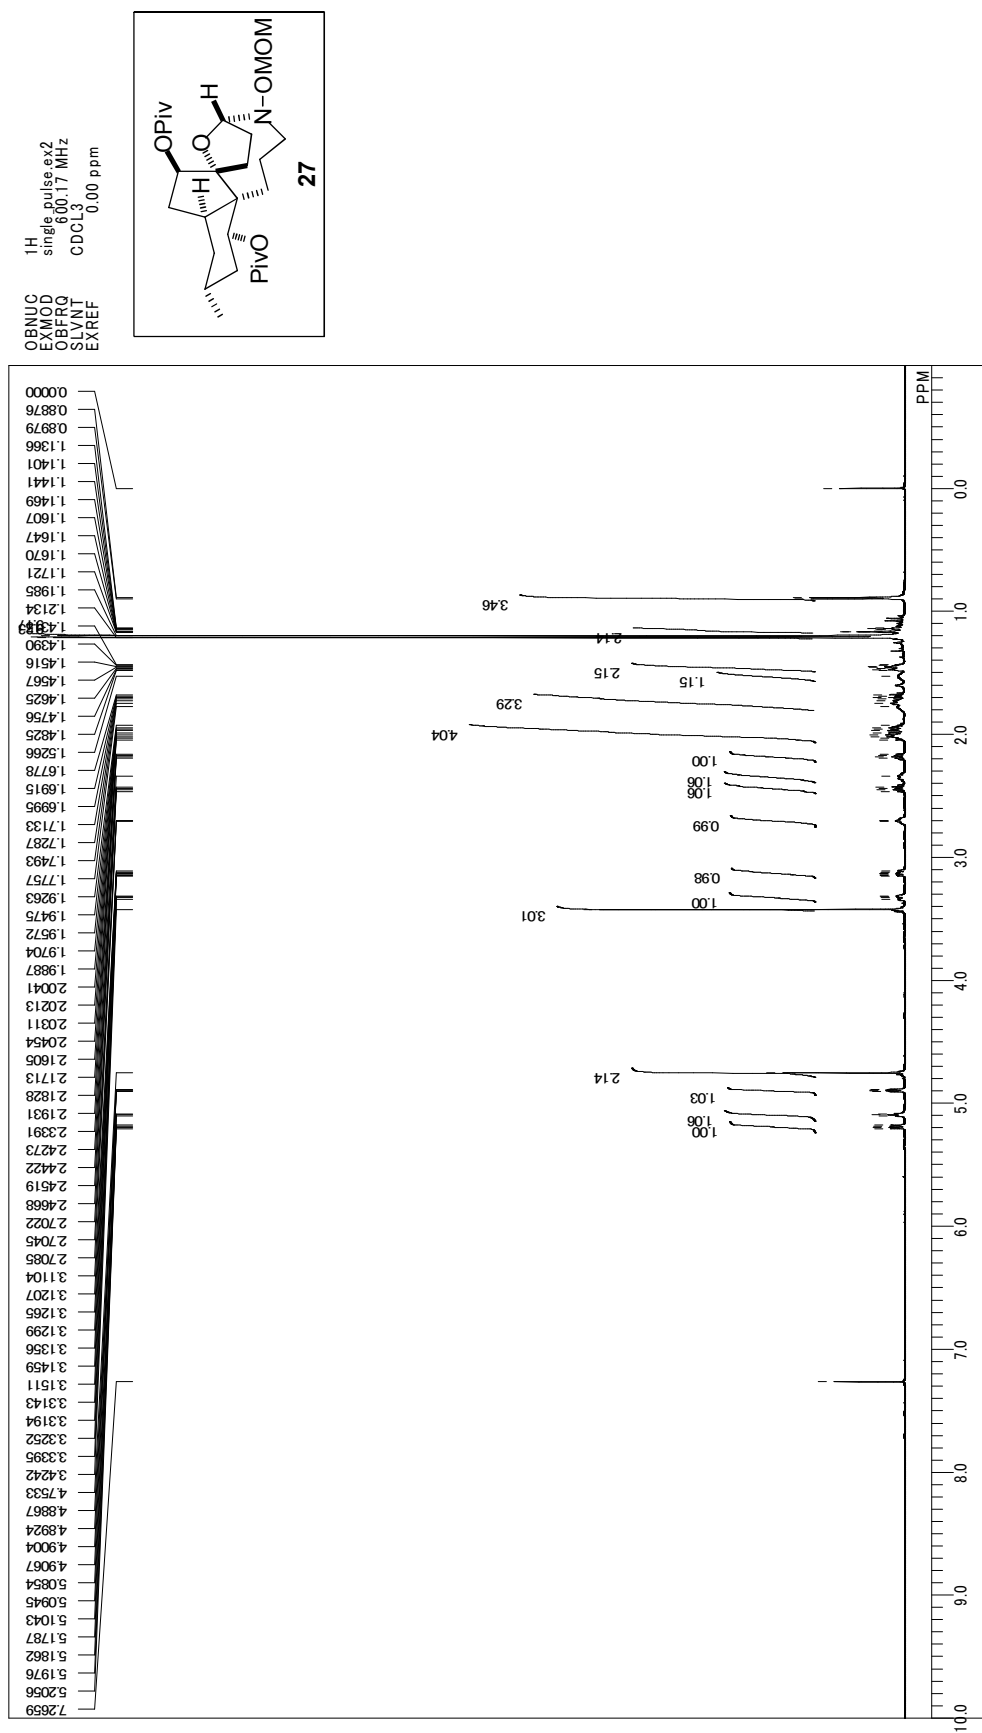

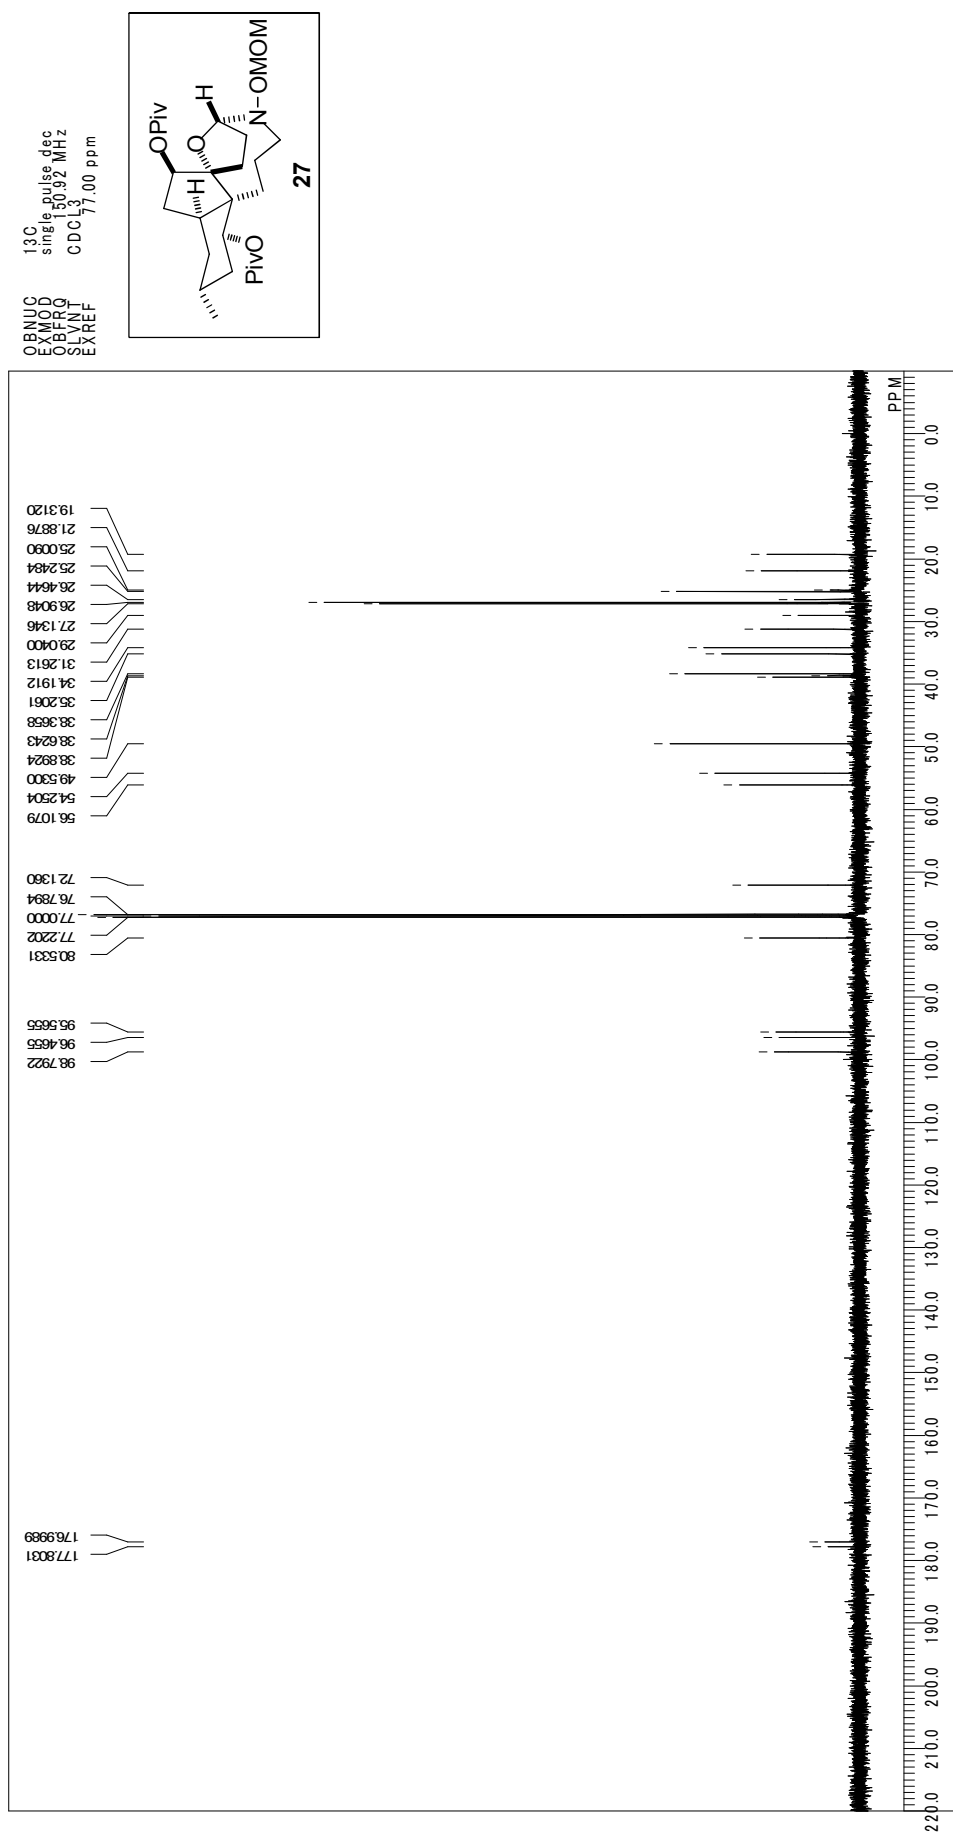

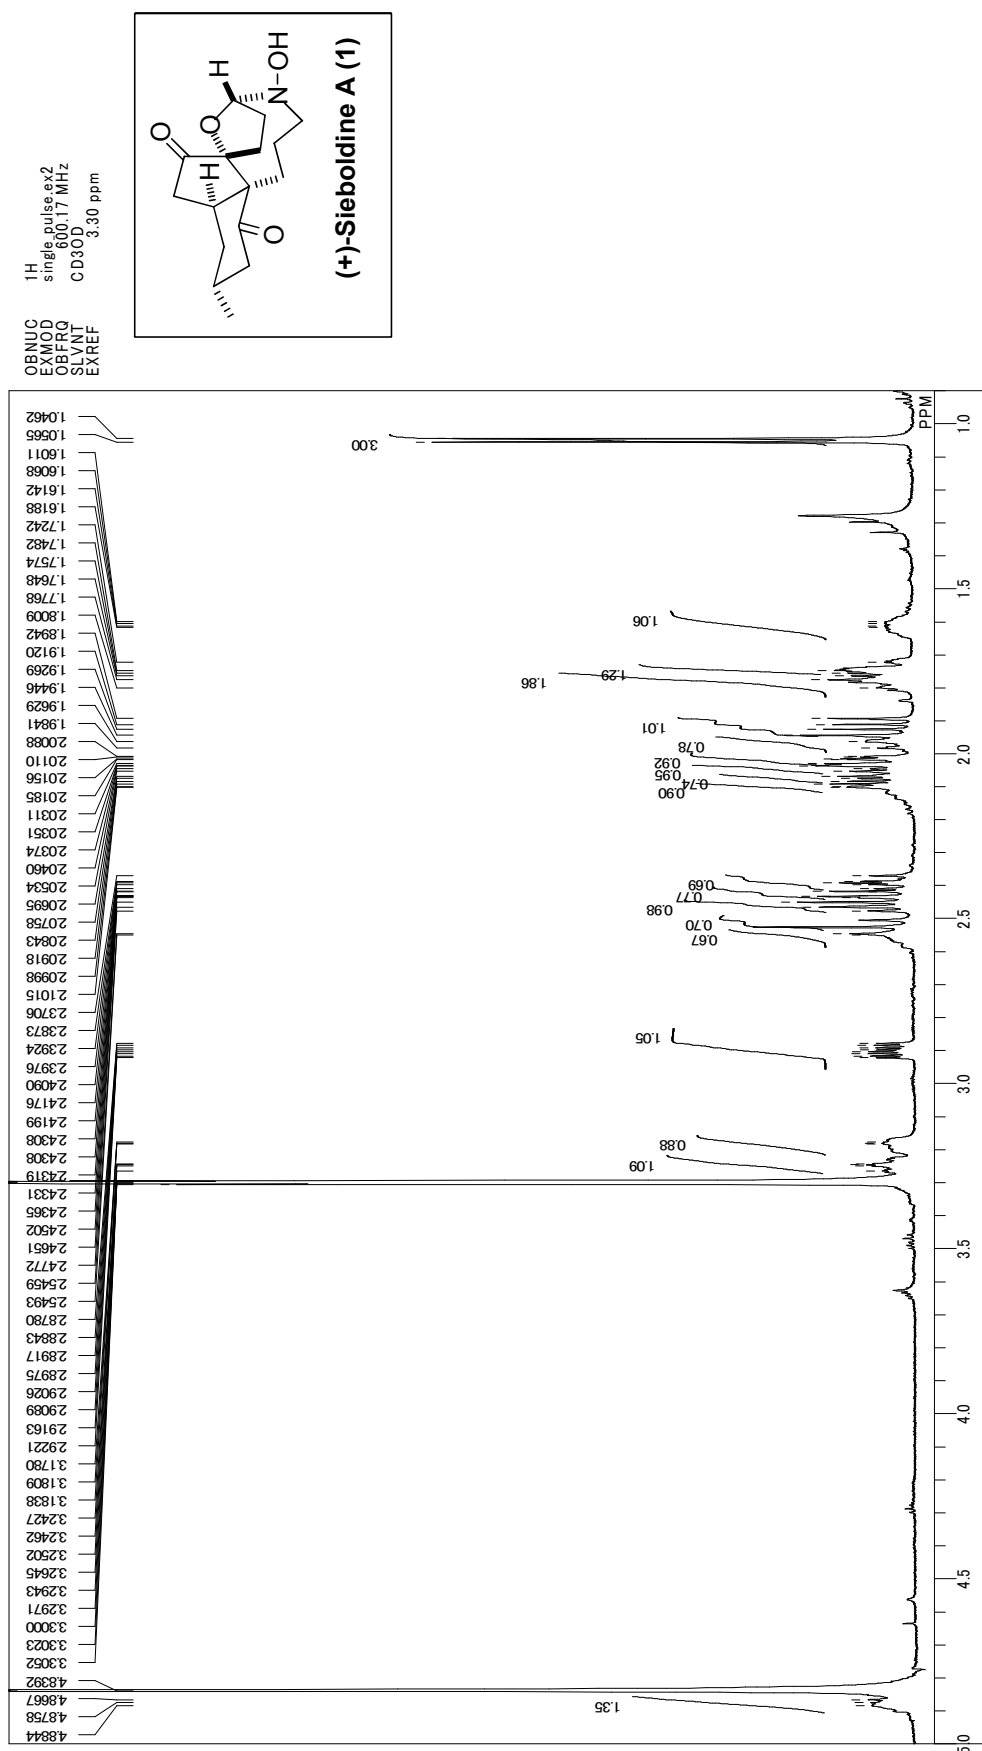



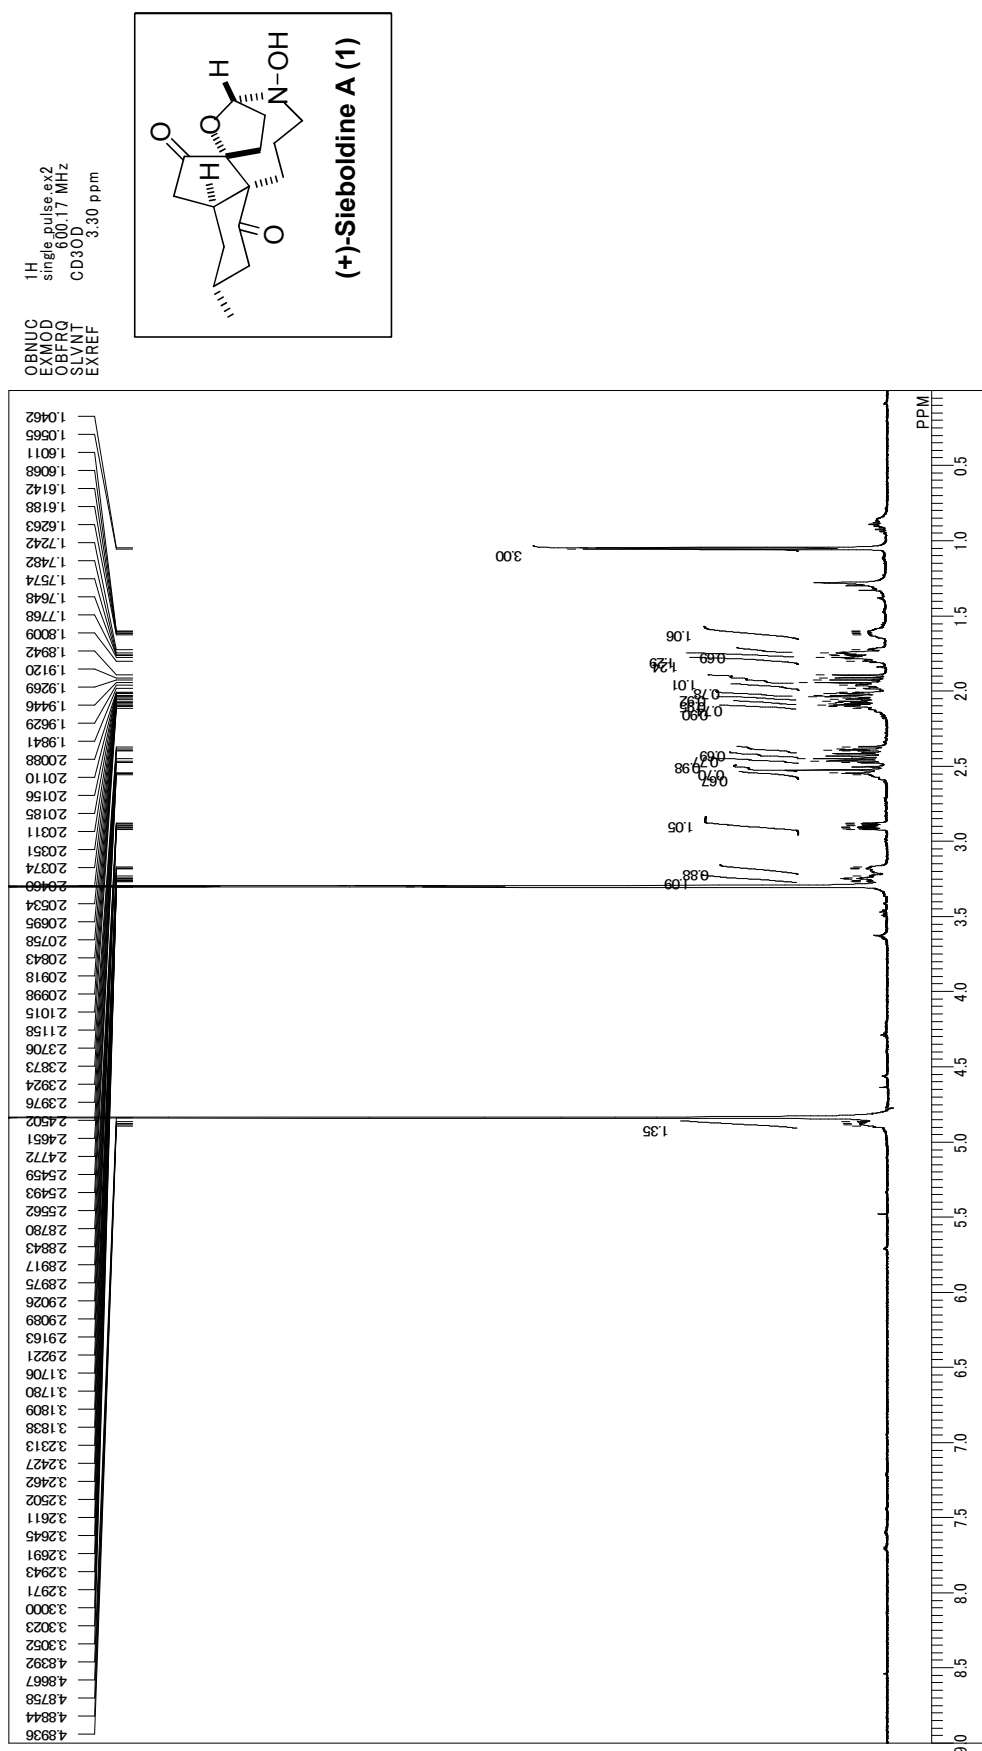



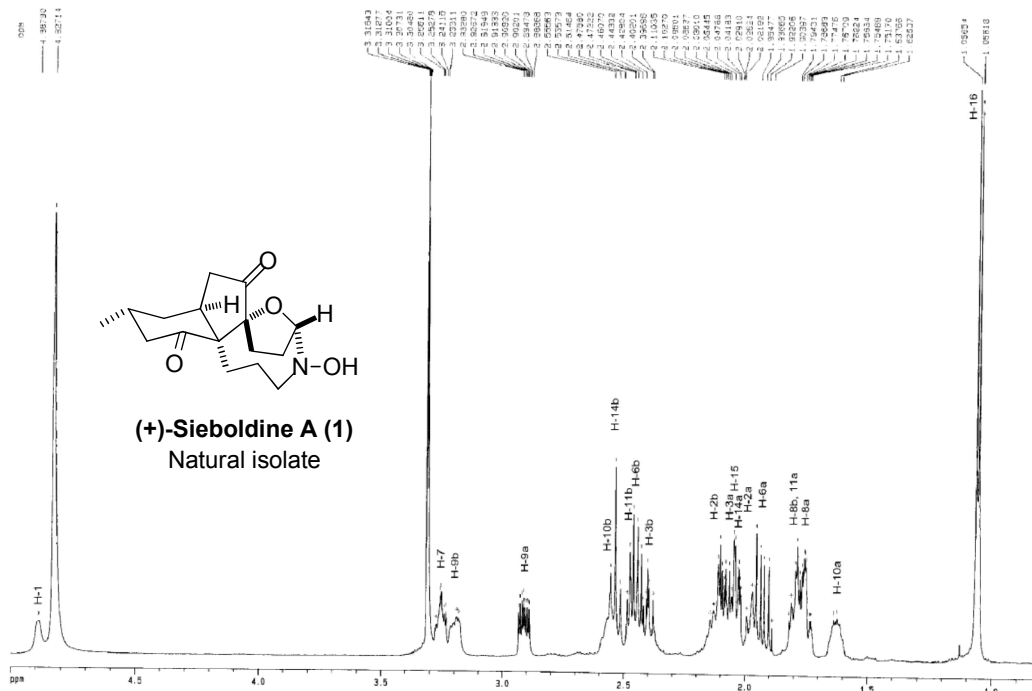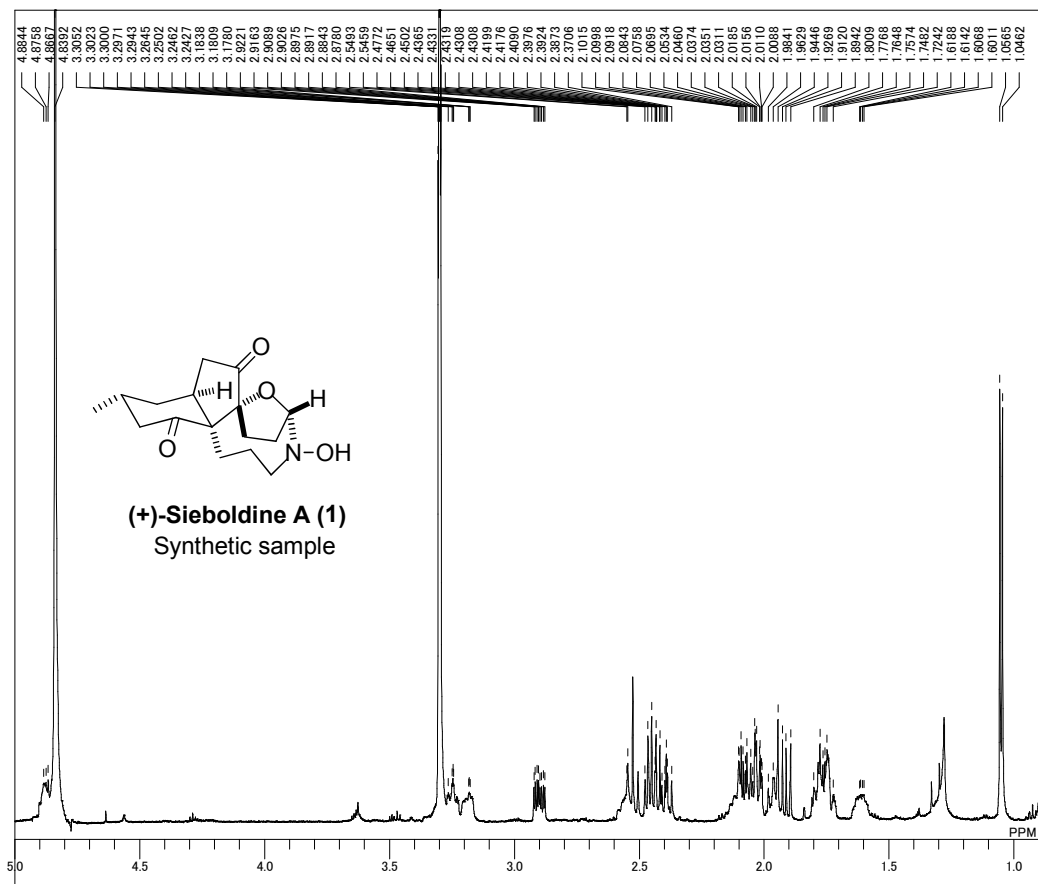

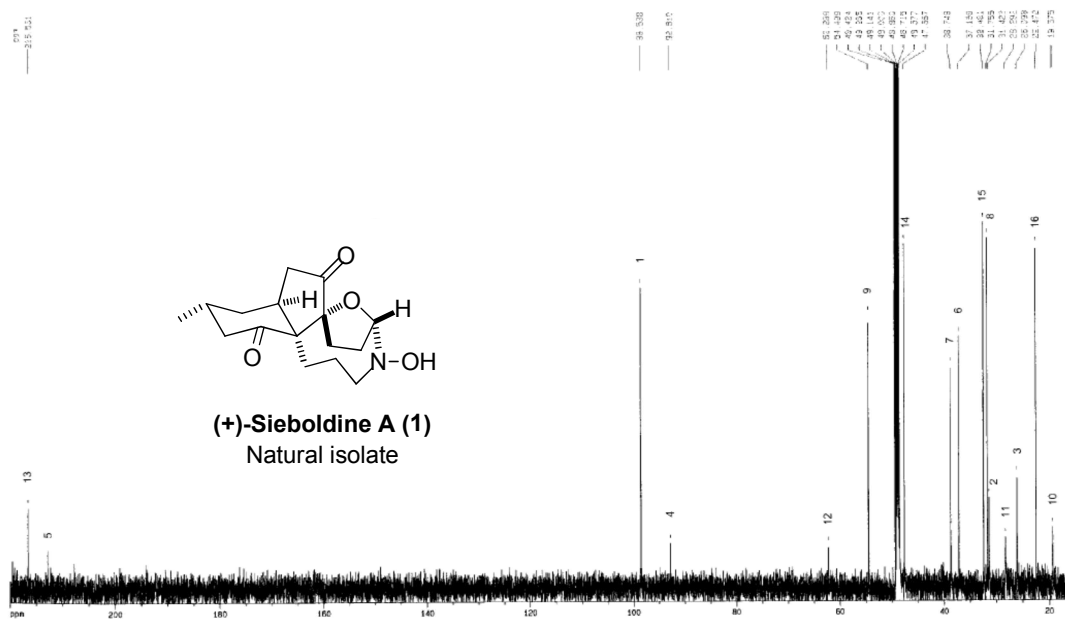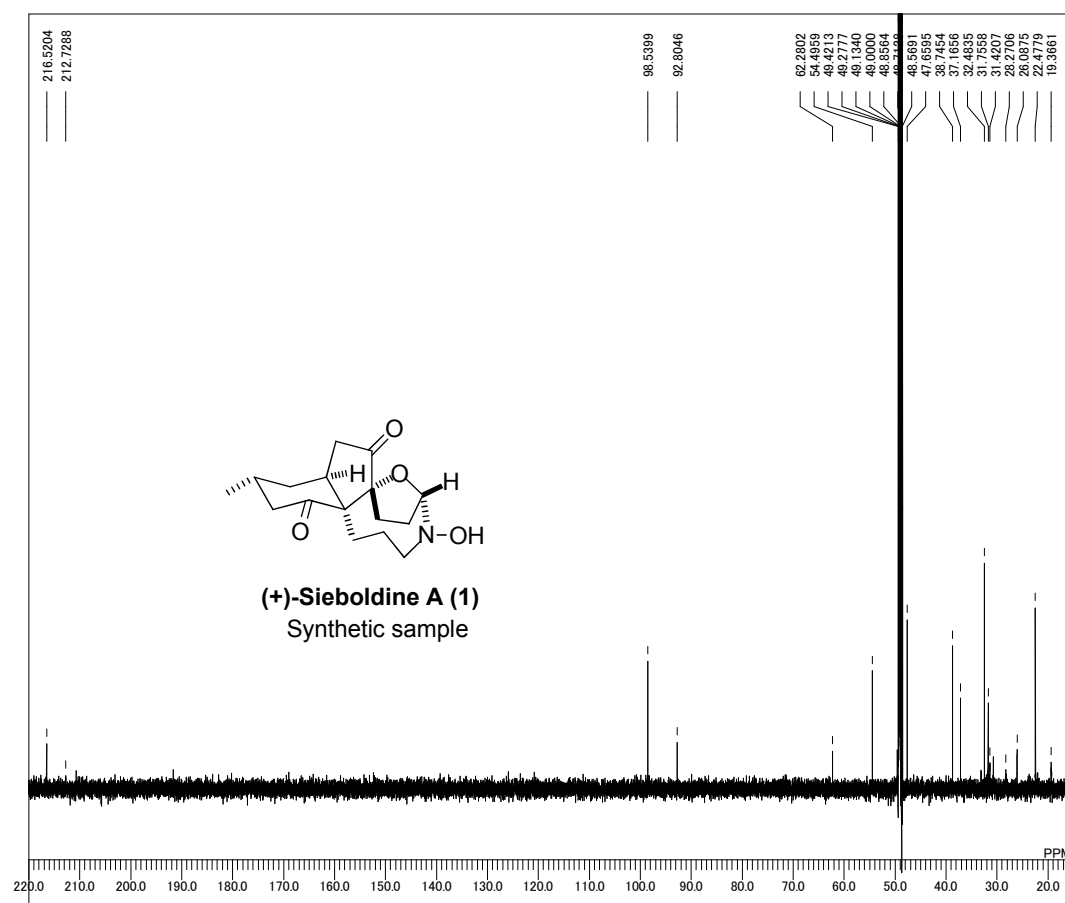

Supplement: Supplementary file 1 [file 7543531]
